# Supplementary material for: Flora of herbaceous and arboreous plants in Komaba Campus of the University of Tokyo, Japan
Source: Biodivers Data J. 2021 Sep 27;9:e73177. doi: 10.3897/BDJ.9.e73177 (PMC8490343; doi:10.3897/BDJ.9.e73177)
Supplement: Supplementary material 1 — The list of samples collected in Komaba I Campus of University of Tokyo [file bdj-09-e73177-s001.csv]

parentNameUsage	occurrenceID	modified	language	basisOfRecord	acceptedNameUsage	scientificName	kingdom	class	order	family	genus	specificEpithet	infraspecificEpithet	identificationRemarks	taxonRank	scientificNameAuthorship	taxonomicStatus	recordedBy	country	stateProvince	municipality	locality	minimumElevationInMeters	maximumElevationInMeters	decimalLatitude	decimalLongitude	identifiedBy	recordNumber	license	eventDate	coordinateUncertaintyInMeters
Justicia L.	77	2021/8/18	en	HumanObservation	Justicia procumbens L. var. procumbens	Justicia procumbens L. var. procumbens	Plantae	Equisetopsida	Lamiales	Acanthaceae	Justicia	procumbens	procumbens		varietas	Linnaeus	accepted	S. Kurata | N. Ishikawa | D. T. Vasques	Japan	Tokyo	Meguro-ku	The University of Tokyo Campus, Komaba I	31	39	35.66	139.685	S. Kurata | N. Ishikawa | D. T. Vasques	KOMABA77	https://creativecommons.org/licenses/by/4.0/legalcode	2017/8/18	100
Sambucus L.	128	2021/8/18	en	HumanObservation	Sambucus chinensis Lindl.	Sambucus chinensis Lindl.	Plantae	Equisetopsida	Dipsacales	Adoxaceae	Sambucus	chinensis			species	Lindley	accepted	S. Kurata | N. Ishikawa | D. T. Vasques	Japan	Tokyo	Meguro-ku	The University of Tokyo Campus, Komaba I	31	39	35.66	139.685	S. Kurata | N. Ishikawa | D. T. Vasques	KOMABA128	https://creativecommons.org/licenses/by/4.0/legalcode	2017/8/19	100
Achyranthes L.	177	2021/8/18	en	HumanObservation	Achyranthes bidentata Blume var. japonica Miq.	Achyranthes bidentata Blume var. japonica Miq.	Plantae	Equisetopsida	Caryophyllales	Amaranthaceae	Achyranthes	bidentata	japonica		varietas	Miquel	accepted	S. Kurata | N. Ishikawa | D. T. Vasques	Japan	Tokyo	Meguro-ku	The University of Tokyo Campus, Komaba I	31	39	35.66	139.685	S. Kurata | N. Ishikawa | D. T. Vasques	KOMABA177	https://creativecommons.org/licenses/by/4.0/legalcode	2017/8/19	100
Achyranthes L.	283	2021/8/18	en	HumanObservation	Achyranthes bidentata Blume var. fauriei (H.Lév. et Vaniot)	Achyranthes bidentata Blume var. fauriei (H.Lév. et Vaniot)	Plantae	Equisetopsida	Caryophyllales	Amaranthaceae	Achyranthes	bidentata	fauriei		varietas	(H. Léveillé et Vaniot)	accepted	S. Kurata | N. Ishikawa | D. T. Vasques	Japan	Tokyo	Meguro-ku	The University of Tokyo Campus, Komaba I	31	39	35.66	139.685	S. Kurata | N. Ishikawa | D. T. Vasques	KOMABA283	https://creativecommons.org/licenses/by/4.0/legalcode	2017/10/9	100
Lycoris Herb.	118	2021/8/18	en	HumanObservation	Lycoris x albiflora Koidz.	Lycoris x albiflora Koidz.	Plantae	Equisetopsida	Asparagales	Amaryllidaceae	Lycoris	x albiflora			species	Koidzumi	accepted	S. Kurata | N. Ishikawa | D. T. Vasques	Japan	Tokyo	Meguro-ku	The University of Tokyo Campus, Komaba I	31	39	35.66	139.685	S. Kurata | N. Ishikawa | D. T. Vasques	KOMABA118	https://creativecommons.org/licenses/by/4.0/legalcode	2018/9/15	100
Allium L.	162	2021/8/18	en	HumanObservation	Allium macrostemon Bunge	Allium macrostemon Bunge	Plantae	Equisetopsida	Asparagales	Amaryllidaceae	Allium	macrostemon			species	Bunge	accepted	S. Kurata | N. Ishikawa | D. T. Vasques	Japan	Tokyo	Meguro-ku	The University of Tokyo Campus, Komaba I	31	39	35.66	139.685	S. Kurata | N. Ishikawa | D. T. Vasques	KOMABA162	https://creativecommons.org/licenses/by/4.0/legalcode	2018/5/6	100
Tristagma Poepp.	170	2021/8/18	en	HumanObservation	Ipheion uniflorum (Graham) Raf.	Ipheion uniflorum (Graham) Raf.	Plantae	Equisetopsida	Asparagales	Amaryllidaceae	Ipheion	uniflorum			species	(Graham) Rafinesque	accepted	S. Kurata | N. Ishikawa | D. T. Vasques	Japan	Tokyo	Meguro-ku	The University of Tokyo Campus, Komaba I	31	39	35.66	139.685	S. Kurata | N. Ishikawa | D. T. Vasques	KOMABA170	https://creativecommons.org/licenses/by/4.0/legalcode	2018/3/29	100
Torilis Adans.	51	2021/8/18	en	HumanObservation	Torilis scabra (Thunb.) DC.	Torilis scabra (Thunb.) DC.	Plantae	Equisetopsida	Apiales	Apiaceae	Torilis	scabra			species	(Thunberg) Candolle	accepted	S. Kurata | N. Ishikawa | D. T. Vasques	Japan	Tokyo	Meguro-ku	The University of Tokyo Campus, Komaba I	31	39	35.66	139.685	S. Kurata | N. Ishikawa | D. T. Vasques	KOMABA51	https://creativecommons.org/licenses/by/4.0/legalcode	2018/5/3	100
Cryptotaenia DC.	207	2021/8/18	en	HumanObservation	Cryptotaenia canadensis (L.) DC. subsp. japonica (Hassk.) Hand.-Mazz.	Cryptotaenia canadensis (L.) DC. subsp. japonica (Hassk.) Hand.-Mazz.	Plantae	Equisetopsida	Apiales	Apiaceae	Cryptotaenia	canadensis	japonica		subspecies	(Hasskarl) Handel-Mazzetti	accepted	S. Kurata | N. Ishikawa | D. T. Vasques	Japan	Tokyo	Meguro-ku	The University of Tokyo Campus, Komaba I	31	39	35.66	139.685	S. Kurata | N. Ishikawa | D. T. Vasques	KOMABA207	https://creativecommons.org/licenses/by/4.0/legalcode	2017/7/2	100
Torilis Adans.	221	2021/8/18	en	HumanObservation	Torilis japonica (Houtt.) DC.	Torilis japonica (Houtt.) DC.	Plantae	Equisetopsida	Apiales	Apiaceae	Torilis	japonica			species	(Houttuyn) Candolle	accepted	S. Kurata | N. Ishikawa | D. T. Vasques	Japan	Tokyo	Meguro-ku	The University of Tokyo Campus, Komaba I	31	39	35.66	139.685	S. Kurata | N. Ishikawa | D. T. Vasques	KOMABA221	https://creativecommons.org/licenses/by/4.0/legalcode	2018/4/20	100
Osmorhiza Raf.	301	2021/8/18	en	HumanObservation	Osmorhiza aristata (Thunb.) Rydb. var. aristata	Osmorhiza aristata (Thunb.) Rydb. var. aristata	Plantae	Equisetopsida	Apiales	Apiaceae	Osmorhiza	aristata	aristata		varietas	(Thunberg) Rydberg	accepted	S. Kurata | N. Ishikawa | D. T. Vasques	Japan	Tokyo	Meguro-ku	The University of Tokyo Campus, Komaba I	31	39	35.66	139.685	S. Kurata | N. Ishikawa | D. T. Vasques	KOMABA301	https://creativecommons.org/licenses/by/4.0/legalcode	2018/5/2	100
Metaplexis R.Br.	54	2021/8/18	en	HumanObservation	Metaplexis japonica (Thunb.) Makino	Metaplexis japonica (Thunb.) Makino	Plantae	Equisetopsida	Gentianales	Apocynaceae	Metaplexis	japonica			species	(Thunberg) Makino	accepted	S. Kurata | N. Ishikawa | D. T. Vasques	Japan	Tokyo	Meguro-ku	The University of Tokyo Campus, Komaba I	31	39	35.66	139.685	S. Kurata | N. Ishikawa | D. T. Vasques	KOMABA54	https://creativecommons.org/licenses/by/4.0/legalcode	2017/8/18	100
Nerium	81	2021/8/18	en	HumanObservation	Nerium oleander L. var. indicum (Mill.) O.Deg. et Greenwell	Nerium oleander L. var. indicum (Mill.) O.Deg. et Greenwell	Plantae	Equisetopsida	Gentianales	Apocynaceae	Nerium	oleander	indicum		varietas	(Miller) O. Degener et Greenwell	accepted	S. Kurata | N. Ishikawa | D. T. Vasques	Japan	Tokyo	Meguro-ku	The University of Tokyo Campus, Komaba I	31	39	35.66	139.685	S. Kurata | N. Ishikawa | D. T. Vasques	KOMABA81	https://creativecommons.org/licenses/by/4.0/legalcode	2018/6/2	100
Vinca L.	139	2021/8/18	en	HumanObservation	Vinca major L.	Vinca major L.	Plantae	Equisetopsida	Gentianales	Apocynaceae	Vinca	major			species	Linnaeus	accepted	S. Kurata | N. Ishikawa | D. T. Vasques	Japan	Tokyo	Meguro-ku	The University of Tokyo Campus, Komaba I	31	39	35.66	139.685	S. Kurata | N. Ishikawa | D. T. Vasques	KOMABA139	https://creativecommons.org/licenses/by/4.0/legalcode	2017/4/28	100
Ilex L.	26	2021/8/18	en	HumanObservation	Ilex crenata Thunb. var. crenata	Ilex crenata Thunb. var. crenata	Plantae	Equisetopsida	Aquifoliales	Aquifoliaceae	Ilex	crenata	crenata		varietas	Thunberg	accepted	S. Kurata | N. Ishikawa | D. T. Vasques	Japan	Tokyo	Meguro-ku	The University of Tokyo Campus, Komaba I	31	39	35.66	139.685	S. Kurata | N. Ishikawa | D. T. Vasques	KOMABA26	https://creativecommons.org/licenses/by/4.0/legalcode	2018/5/18	100
Pinellia Ten.	281	2021/8/18	en	HumanObservation	Pinellia ternata (Thunb.) Breitenb.	Pinellia ternata (Thunb.) Breitenb.	Plantae	Equisetopsida	Alismatales	Araceae	Pinellia	ternata			species	(Thunberg) Breitenbach	accepted	S. Kurata | N. Ishikawa | D. T. Vasques	Japan	Tokyo	Meguro-ku	The University of Tokyo Campus, Komaba I	31	39	35.66	139.685	S. Kurata | N. Ishikawa | D. T. Vasques	KOMABA281	https://creativecommons.org/licenses/by/4.0/legalcode	2017/8/19	100
Hydrocotyle L.	160	2021/8/18	en	HumanObservation	Hydrocotyle maritima Honda	Hydrocotyle maritima Honda	Plantae	Equisetopsida	Apiales	Araliaceae	Hydrocotyle	maritima			species	Honda	accepted	S. Kurata | N. Ishikawa | D. T. Vasques	Japan	Tokyo	Meguro-ku	The University of Tokyo Campus, Komaba I	31	39	35.66	139.685	S. Kurata | N. Ishikawa | D. T. Vasques	KOMABA160	https://creativecommons.org/licenses/by/4.0/legalcode	2018/5/18	100
Fatsia Decne. & Planch.	220	2021/8/18	en	HumanObservation	Fatsia japonica (Thunb.) Decne. et Planch.	Fatsia japonica (Thunb.) Decne. et Planch.	Plantae	Equisetopsida	Apiales	Araliaceae	Fatsia	japonica			species	(Thunberg) Decaisne et Planchon	accepted	S. Kurata | N. Ishikawa | D. T. Vasques	Japan	Tokyo	Meguro-ku	The University of Tokyo Campus, Komaba I	31	39	35.66	139.685	S. Kurata | N. Ishikawa | D. T. Vasques	KOMABA220	https://creativecommons.org/licenses/by/4.0/legalcode	2017/8/18	100
Barnardia Lindl.	140	2021/8/18	en	HumanObservation	Barnardia japonica (Thunb.) Schult. et Schult.f.	Barnardia japonica (Thunb.) Schult. et Schult.f.	Plantae	Equisetopsida	Asparagales	Asparagaceae	Barnardia	japonica			species	(Thunberg) Schultes et Schultesf	accepted	S. Kurata | N. Ishikawa | D. T. Vasques	Japan	Tokyo	Meguro-ku	The University of Tokyo Campus, Komaba I	31	39	35.66	139.685	S. Kurata | N. Ishikawa | D. T. Vasques	KOMABA140	https://creativecommons.org/licenses/by/4.0/legalcode	2018/10/2	100
Liriope Lesson	228	2021/8/18	en	HumanObservation	Liriope muscari (Decne.) L.H.Bailey	Liriope muscari (Decne.) L.H.Bailey	Plantae	Equisetopsida	Asparagales	Asparagaceae	Liriope	muscari			species	(Decaisne) L.H. Bailey	accepted	S. Kurata | N. Ishikawa | D. T. Vasques	Japan	Tokyo	Meguro-ku	The University of Tokyo Campus, Komaba I	31	39	35.66	139.685	S. Kurata | N. Ishikawa | D. T. Vasques	KOMABA228	https://creativecommons.org/licenses/by/4.0/legalcode	2017/8/18	100
Ornithogalum L.	244	2021/8/18	en	HumanObservation	Ornithogalum umbellatum L.	Ornithogalum umbellatum L.	Plantae	Equisetopsida	Asparagales	Asparagaceae	Ornithogalum	umbellatum			species	Linnaeus	accepted	S. Kurata | N. Ishikawa | D. T. Vasques	Japan	Tokyo	Meguro-ku	The University of Tokyo Campus, Komaba I	31	39	35.66	139.685	S. Kurata | N. Ishikawa | D. T. Vasques	KOMABA244	https://creativecommons.org/licenses/by/4.0/legalcode	2017/4/14	100
Asplenium L.	267	2021/8/18	en	HumanObservation	Asplenium incisum Thunb.	Asplenium incisum Thunb.	Plantae	Equisetopsida	Polypodiales	Aspleniaceae	Asplenium	incisum			species	Thunberg	accepted	S. Kurata | N. Ishikawa | D. T. Vasques	Japan	Tokyo	Meguro-ku	The University of Tokyo Campus, Komaba I	31	39	35.66	139.685	S. Kurata | N. Ishikawa | D. T. Vasques	KOMABA267	https://creativecommons.org/licenses/by/4.0/legalcode	2018/6/2	100
Lactuca L.	9	2021/8/18	en	HumanObservation	Lactuca indica L.	Lactuca indica L.	Plantae	Equisetopsida	Asterales	Asteraceae	Lactuca	indica			species	Linnaeus	accepted	S. Kurata | N. Ishikawa | D. T. Vasques	Japan	Tokyo	Meguro-ku	The University of Tokyo Campus, Komaba I	31	39	35.66	139.685	S. Kurata | N. Ishikawa | D. T. Vasques	KOMABA9	https://creativecommons.org/licenses/by/4.0/legalcode	2018/8/20	100
Cirsium Mill.	14	2021/8/18	en	HumanObservation	Cirsium vulgare (Savi) Ten.	Cirsium vulgare (Savi) Ten.	Plantae	Equisetopsida	Asterales	Asteraceae	Cirsium	vulgare			species	(Savi) Tenore	accepted	S. Kurata | N. Ishikawa | D. T. Vasques	Japan	Tokyo	Meguro-ku	The University of Tokyo Campus, Komaba I	31	39	35.66	139.685	S. Kurata | N. Ishikawa | D. T. Vasques	KOMABA14	https://creativecommons.org/licenses/by/4.0/legalcode	2018/6/11	100
Gamochaeta Wedd.	33	2021/8/18	en	HumanObservation	Gamochaeta coarctata (Willd.) Kerguélen	Gamochaeta coarctata (Willd.) Kerguélen	Plantae	Equisetopsida	Asterales	Asteraceae	Gamochaeta	coarctata			species	(Willdenow) Kerguélen	accepted	S. Kurata | N. Ishikawa | D. T. Vasques	Japan	Tokyo	Meguro-ku	The University of Tokyo Campus, Komaba I	31	39	35.66	139.685	S. Kurata | N. Ishikawa | D. T. Vasques	KOMABA33	https://creativecommons.org/licenses/by/4.0/legalcode	2017/7/2	100
Erigeron L.	40	2021/8/18	en	HumanObservation	Erigeron sumatrensis Retz.	Erigeron sumatrensis Retz.	Plantae	Equisetopsida	Asterales	Asteraceae	Erigeron	sumatrensis			species	Retzius	accepted	S. Kurata | N. Ishikawa | D. T. Vasques	Japan	Tokyo	Meguro-ku	The University of Tokyo Campus, Komaba I	31	39	35.66	139.685	S. Kurata | N. Ishikawa | D. T. Vasques	KOMABA40	https://creativecommons.org/licenses/by/4.0/legalcode	2017/8/18	100
Youngia Cass.	48	2021/8/18	en	HumanObservation	Youngia japonica (L.) DC.	Youngia japonica (L.) DC.	Plantae	Equisetopsida	Asterales	Asteraceae	Youngia	japonica			species	(Linnaeus) Candolle	accepted	S. Kurata | N. Ishikawa | D. T. Vasques	Japan	Tokyo	Meguro-ku	The University of Tokyo Campus, Komaba I	31	39	35.66	139.685	S. Kurata | N. Ishikawa | D. T. Vasques	KOMABA48	https://creativecommons.org/licenses/by/4.0/legalcode	2017/4/14	100
Taraxacum F.H. Wigg.	69	2021/8/18	en	HumanObservation	Taraxacum platycarpum Dahlst. var. platycarpum	Taraxacum platycarpum Dahlst. var. platycarpum	Plantae	Equisetopsida	Asterales	Asteraceae	Taraxacum	platycarpum	platycarpum		varietas	Dahlstedt	accepted	S. Kurata | N. Ishikawa | D. T. Vasques	Japan	Tokyo	Meguro-ku	The University of Tokyo Campus, Komaba I	31	39	35.66	139.685	S. Kurata | N. Ishikawa | D. T. Vasques	KOMABA69	https://creativecommons.org/licenses/by/4.0/legalcode	2017/4/28	100
Helianthus L.	72	2021/8/18	en	HumanObservation	Helianthus tuberosus L.	Helianthus tuberosus L.	Plantae	Equisetopsida	Asterales	Asteraceae	Helianthus	tuberosus			species	Linnaeus	accepted	S. Kurata | N. Ishikawa | D. T. Vasques	Japan	Tokyo	Meguro-ku	The University of Tokyo Campus, Komaba I	31	39	35.66	139.685	S. Kurata | N. Ishikawa | D. T. Vasques	KOMABA72	https://creativecommons.org/licenses/by/4.0/legalcode	2018/9/23	100
Cosmos Cav.	78	2021/8/18	en	HumanObservation	Cosmos sulphureus Cav.	Cosmos sulphureus Cav.	Plantae	Equisetopsida	Asterales	Asteraceae	Cosmos	sulphureus			species	Cavanilles	accepted	S. Kurata | N. Ishikawa | D. T. Vasques	Japan	Tokyo	Meguro-ku	The University of Tokyo Campus, Komaba I	31	39	35.66	139.685	S. Kurata | N. Ishikawa | D. T. Vasques	KOMABA78	https://creativecommons.org/licenses/by/4.0/legalcode	2018/10/2	100
Bidens L.	95	2021/8/18	en	HumanObservation	Bidens pilosa L. var. pilosa	Bidens pilosa L. var. pilosa	Plantae	Equisetopsida	Asterales	Asteraceae	Bidens	pilosa	pilosa		varietas	Linnaeus	accepted	S. Kurata | N. Ishikawa | D. T. Vasques	Japan	Tokyo	Meguro-ku	The University of Tokyo Campus, Komaba I	31	39	35.66	139.685	S. Kurata | N. Ishikawa | D. T. Vasques	KOMABA95	https://creativecommons.org/licenses/by/4.0/legalcode	2017/10/9	100
Taraxacum F.H. Wigg.	117	2021/8/18	en	HumanObservation	Taraxacum albidum Dahlst.	Taraxacum albidum Dahlst.	Plantae	Equisetopsida	Asterales	Asteraceae	Taraxacum	albidum			species	Dahlstedt	accepted	S. Kurata | N. Ishikawa | D. T. Vasques	Japan	Tokyo	Meguro-ku	The University of Tokyo Campus, Komaba I	31	39	35.66	139.685	S. Kurata | N. Ishikawa | D. T. Vasques	KOMABA117	https://creativecommons.org/licenses/by/4.0/legalcode	2018/11/21	100
Solidago L.	124	2021/8/18	en	HumanObservation	Solidago altissima L.	Solidago altissima L.	Plantae	Equisetopsida	Asterales	Asteraceae	Solidago	altissima			species	Linnaeus	accepted	S. Kurata | N. Ishikawa | D. T. Vasques	Japan	Tokyo	Meguro-ku	The University of Tokyo Campus, Komaba I	31	39	35.66	139.685	S. Kurata | N. Ishikawa | D. T. Vasques	KOMABA124	https://creativecommons.org/licenses/by/4.0/legalcode	2018/6/1	100
Gnaphalium L.	134	2021/8/18	en	HumanObservation	Gnaphalium japonicum Thunb.	Gnaphalium japonicum Thunb.	Plantae	Equisetopsida	Asterales	Asteraceae	Gnaphalium	japonicum			species	Thunberg	accepted	S. Kurata | N. Ishikawa | D. T. Vasques	Japan	Tokyo	Meguro-ku	The University of Tokyo Campus, Komaba I	31	39	35.66	139.685	S. Kurata | N. Ishikawa | D. T. Vasques	KOMABA134	https://creativecommons.org/licenses/by/4.0/legalcode	2018/5/18	100
Ixeridium (A.Gray) Tzvelev	153	2021/8/18	en	HumanObservation	Ixeridium dentatum (Thunb.) Tzvelev subsp. dentatum	Ixeridium dentatum (Thunb.) Tzvelev subsp. dentatum	Plantae	Equisetopsida	Asterales	Asteraceae	Ixeridium	dentatum	dentatum		subspecies	(Thunberg) Tzvelev	accepted	S. Kurata | N. Ishikawa | D. T. Vasques	Japan	Tokyo	Meguro-ku	The University of Tokyo Campus, Komaba I	31	39	35.66	139.685	S. Kurata | N. Ishikawa | D. T. Vasques	KOMABA153	https://creativecommons.org/licenses/by/4.0/legalcode	2018/5/18	100
Sonchus L.	158	2021/8/18	en	HumanObservation	Sonchus oleraceus L.	Sonchus oleraceus L.	Plantae	Equisetopsida	Asterales	Asteraceae	Sonchus	oleraceus			species	Linnaeus	accepted	S. Kurata | N. Ishikawa | D. T. Vasques	Japan	Tokyo	Meguro-ku	The University of Tokyo Campus, Komaba I	31	39	35.66	139.685	S. Kurata | N. Ishikawa | D. T. Vasques	KOMABA158	https://creativecommons.org/licenses/by/4.0/legalcode	2017/4/28	100
Aster L.	159	2021/8/18	en	HumanObservation	Aster microcephalus (Miq.) Franch. et Sav. var. ovatus (Franch. et Sav.) Soejima et Mot.Ito	Aster microcephalus (Miq.) Franch. et Sav. var. ovatus (Franch. et Sav.) Soejima et Mot.Ito	Plantae	Equisetopsida	Asterales	Asteraceae	Aster	microcephalus	ovatus		varietas	(Franchet et Savatier) Soejima et M. Ito	accepted	S. Kurata | N. Ishikawa | D. T. Vasques	Japan	Tokyo	Meguro-ku	The University of Tokyo Campus, Komaba I	31	39	35.66	139.685	S. Kurata | N. Ishikawa | D. T. Vasques	KOMABA159	https://creativecommons.org/licenses/by/4.0/legalcode	2018/11/12	100
Galinsoga Ruiz & Pav.	164	2021/8/18	en	HumanObservation	Galinsoga quadriradiata Ruiz et Pav.	Galinsoga quadriradiata Ruiz et Pav.	Plantae	Equisetopsida	Asterales	Asteraceae	Galinsoga	quadriradiata			species	Ruiz et Pavon	accepted	S. Kurata | N. Ishikawa | D. T. Vasques	Japan	Tokyo	Meguro-ku	The University of Tokyo Campus, Komaba I	31	39	35.66	139.685	S. Kurata | N. Ishikawa | D. T. Vasques	KOMABA164	https://creativecommons.org/licenses/by/4.0/legalcode	2017/6/16	100
Pseudognaphalium Kirp.	171	2021/8/18	en	HumanObservation	Pseudognaphalium affine (D.Don) Anderb.	Pseudognaphalium affine (D.Don) Anderb.	Plantae	Equisetopsida	Asterales	Asteraceae	Pseudognaphalium	affine			species	(D. Don) Anderbeg	accepted	S. Kurata | N. Ishikawa | D. T. Vasques	Japan	Tokyo	Meguro-ku	The University of Tokyo Campus, Komaba I	31	39	35.66	139.685	S. Kurata | N. Ishikawa | D. T. Vasques	KOMABA171	https://creativecommons.org/licenses/by/4.0/legalcode	2018/5/2	100
Erigeron L.	176	2021/8/18	en	HumanObservation	Erigeron philadelphicus L.	Erigeron philadelphicus L.	Plantae	Equisetopsida	Asterales	Asteraceae	Erigeron	philadelphicus			species	Linnaeus	accepted	S. Kurata | N. Ishikawa | D. T. Vasques	Japan	Tokyo	Meguro-ku	The University of Tokyo Campus, Komaba I	31	39	35.66	139.685	S. Kurata | N. Ishikawa | D. T. Vasques	KOMABA176	https://creativecommons.org/licenses/by/4.0/legalcode	2017/4/21	100
Erigeron L.	184	2021/8/18	en	HumanObservation	Erigeron annuus (L.) Pers.	Erigeron annuus (L.) Pers.	Plantae	Equisetopsida	Asterales	Asteraceae	Erigeron	annuus			species	(Linnaeus) Persoon	accepted	S. Kurata | N. Ishikawa | D. T. Vasques	Japan	Tokyo	Meguro-ku	The University of Tokyo Campus, Komaba I	31	39	35.66	139.685	S. Kurata | N. Ishikawa | D. T. Vasques	KOMABA184	https://creativecommons.org/licenses/by/4.0/legalcode	2017/6/16	100
Ambrosia L.	190	2021/8/18	en	HumanObservation	Ambrosia artemisiifolia L.	Ambrosia artemisiifolia L.	Plantae	Equisetopsida	Asterales	Asteraceae	Ambrosia	artemisiifolia			species	Linnaeus	accepted	S. Kurata | N. Ishikawa | D. T. Vasques	Japan	Tokyo	Meguro-ku	The University of Tokyo Campus, Komaba I	31	39	35.66	139.685	S. Kurata | N. Ishikawa | D. T. Vasques	KOMABA190	https://creativecommons.org/licenses/by/4.0/legalcode	2017/8/18	100
Ageratina Spach	205	2021/8/18	en	HumanObservation	Ageratina altissima (L.) R.M.King et H.Rob.	Ageratina altissima (L.) R.M.King et H.Rob.	Plantae	Equisetopsida	Asterales	Asteraceae	Ageratina	altissima			species	(Linnaeus) R.M.King et H. Robinson	accepted	S. Kurata | N. Ishikawa | D. T. Vasques	Japan	Tokyo	Meguro-ku	The University of Tokyo Campus, Komaba I	31	39	35.66	139.685	S. Kurata | N. Ishikawa | D. T. Vasques	KOMABA205	https://creativecommons.org/licenses/by/4.0/legalcode	2017/10/9	100
Carpesium L.	223	2021/8/18	en	HumanObservation	Carpesium abrotanoides L.	Carpesium abrotanoides L.	Plantae	Equisetopsida	Asterales	Asteraceae	Carpesium	abrotanoides			species	Linnaeus	accepted	S. Kurata | N. Ishikawa | D. T. Vasques	Japan	Tokyo	Meguro-ku	The University of Tokyo Campus, Komaba I	31	39	35.66	139.685	S. Kurata | N. Ishikawa | D. T. Vasques	KOMABA223	https://creativecommons.org/licenses/by/4.0/legalcode	2017/10/9	100
Aster L.	232	2021/8/18	en	HumanObservation	Aster iinumae Kitam.	Aster iinumae Kitam.	Plantae	Equisetopsida	Asterales	Asteraceae	Aster	iinumae			species	Kitamura	accepted	S. Kurata | N. Ishikawa | D. T. Vasques	Japan	Tokyo	Meguro-ku	The University of Tokyo Campus, Komaba I	31	39	35.66	139.685	S. Kurata | N. Ishikawa | D. T. Vasques	KOMABA232	https://creativecommons.org/licenses/by/4.0/legalcode	2018/8/20	100
Artemisia L.	234	2021/8/18	en	HumanObservation	Artemisia indica Willd. var. maximowiczii (Nakai) H.Hara	Artemisia indica Willd. var. maximowiczii (Nakai) H.Hara	Plantae	Equisetopsida	Asterales	Asteraceae	Artemisia	indica	maximowiczii		varietas	(Nakai) H. Hara	accepted	S. Kurata | N. Ishikawa | D. T. Vasques	Japan	Tokyo	Meguro-ku	The University of Tokyo Campus, Komaba I	31	39	35.66	139.685	S. Kurata | N. Ishikawa | D. T. Vasques	KOMABA234	https://creativecommons.org/licenses/by/4.0/legalcode	2018/6/1	100
Youngia Cass.	238	2021/8/18	en	HumanObservation	Youngia japonica (L.) DC. subsp. japonica	Youngia japonica (L.) DC. subsp. japonica	Plantae	Equisetopsida	Asterales	Asteraceae	Youngia	japonica	japonica		subspecies	(Linnaeus) Candolle	accepted	S. Kurata | N. Ishikawa | D. T. Vasques	Japan	Tokyo	Meguro-ku	The University of Tokyo Campus, Komaba I	31	39	35.66	139.685	S. Kurata | N. Ishikawa | D. T. Vasques	KOMABA238	https://creativecommons.org/licenses/by/4.0/legalcode	2018/4/20	100
Bidens L.	241	2021/8/18	en	HumanObservation	Bidens frondosa L.	Bidens frondosa L.	Plantae	Equisetopsida	Asterales	Asteraceae	Bidens	frondosa			species	Linnaeus	accepted	S. Kurata | N. Ishikawa | D. T. Vasques	Japan	Tokyo	Meguro-ku	The University of Tokyo Campus, Komaba I	31	39	35.66	139.685	S. Kurata | N. Ishikawa | D. T. Vasques	KOMABA241	https://creativecommons.org/licenses/by/4.0/legalcode	2017/10/9	100
Rudbeckia L.	246	2021/8/18	en	HumanObservation	Rudbeckia laciniata L.	Rudbeckia laciniata L.	Plantae	Equisetopsida	Asterales	Asteraceae	Rudbeckia	laciniata			species	Linnaeus	accepted	S. Kurata | N. Ishikawa | D. T. Vasques	Japan	Tokyo	Meguro-ku	The University of Tokyo Campus, Komaba I	31	39	35.66	139.685	S. Kurata | N. Ishikawa | D. T. Vasques	KOMABA246	https://creativecommons.org/licenses/by/4.0/legalcode	2017/8/18	100
Ambrosia L.	247	2021/8/18	en	HumanObservation	Ambrosia trifida L.	Ambrosia trifida L.	Plantae	Equisetopsida	Asterales	Asteraceae	Ambrosia	trifida			species	Linnaeus	accepted	S. Kurata | N. Ishikawa | D. T. Vasques	Japan	Tokyo	Meguro-ku	The University of Tokyo Campus, Komaba I	31	39	35.66	139.685	S. Kurata | N. Ishikawa | D. T. Vasques	KOMABA247	https://creativecommons.org/licenses/by/4.0/legalcode	2018/10/2	100
Bidens L.	260	2021/8/18	en	HumanObservation	Bidens pilosa L. var. minor (Blume) Sherff	Bidens pilosa L. var. minor (Blume) Sherff	Plantae	Equisetopsida	Asterales	Asteraceae	Bidens	pilosa	minor		varietas	(Blume) Sherff	accepted	S. Kurata | N. Ishikawa | D. T. Vasques	Japan	Tokyo	Meguro-ku	The University of Tokyo Campus, Komaba I	31	39	35.66	139.685	S. Kurata | N. Ishikawa | D. T. Vasques	KOMABA260	https://creativecommons.org/licenses/by/4.0/legalcode	2017/10/9	100
Conoclinium DC.	261	2021/8/18	en	HumanObservation	Conoclinium coelestinum (L.) DC.	Conoclinium coelestinum (L.) DC.	Plantae	Equisetopsida	Asterales	Asteraceae	Conoclinium	coelestinum			species	(Linnaeus) Candolle	accepted	S. Kurata | N. Ishikawa | D. T. Vasques	Japan	Tokyo	Meguro-ku	The University of Tokyo Campus, Komaba I	31	39	35.66	139.685	S. Kurata | N. Ishikawa | D. T. Vasques	KOMABA261	https://creativecommons.org/licenses/by/4.0/legalcode	2018/10/2	100
Erechtites Raf.	266	2021/8/18	en	HumanObservation	Erechtites hieraciifolius (L.) Raf. ex DC.	Erechtites hieraciifolius (L.) Raf. ex DC.	Plantae	Equisetopsida	Asterales	Asteraceae	Erechtites	hieraciifolius			species	(Linnaeus) Rafinesque ex Candolle	accepted	S. Kurata | N. Ishikawa | D. T. Vasques	Japan	Tokyo	Meguro-ku	The University of Tokyo Campus, Komaba I	31	39	35.66	139.685	S. Kurata | N. Ishikawa | D. T. Vasques	KOMABA266	https://creativecommons.org/licenses/by/4.0/legalcode	2017/10/9	100
Erigeron L.	287	2021/8/18	en	HumanObservation	Erigeron canadensis L.	Erigeron canadensis L.	Plantae	Equisetopsida	Asterales	Asteraceae	Erigeron	canadensis			species	Linnaeus	accepted	S. Kurata | N. Ishikawa | D. T. Vasques	Japan	Tokyo	Meguro-ku	The University of Tokyo Campus, Komaba I	31	39	35.66	139.685	S. Kurata | N. Ishikawa | D. T. Vasques	KOMABA287	https://creativecommons.org/licenses/by/4.0/legalcode	2018/8/20	100
Symphyotrichum Nees	291	2021/8/18	en	HumanObservation	Symphyotrichum subulatum (Michx.) G.L.Nesom var. subulatum	Symphyotrichum subulatum (Michx.) G.L.Nesom var. subulatum	Plantae	Equisetopsida	Asterales	Asteraceae	Symphyotrichum	subulatum	subulatum		varietas	(Michaux) G.L. Nesom	accepted	S. Kurata | N. Ishikawa | D. T. Vasques	Japan	Tokyo	Meguro-ku	The University of Tokyo Campus, Komaba I	31	39	35.66	139.685	S. Kurata | N. Ishikawa | D. T. Vasques	KOMABA291	https://creativecommons.org/licenses/by/4.0/legalcode	2018/9/15	100
Anisocampium C.Presl	30	2021/8/18	en	HumanObservation	Anisocampium niponicum (Mett.) Y.C.Liu, W.L.Chiou et M.Kato	Anisocampium niponicum (Mett.) Y.C.Liu, W.L.Chiou et M.Kato	Plantae	Equisetopsida	Polypodiales	Athyriaceae	Anisocampium	niponicum			species	(Mettenius) Y.C. Liu, W.L. Chiou et M. Kato	accepted	S. Kurata | N. Ishikawa | D. T. Vasques	Japan	Tokyo	Meguro-ku	The University of Tokyo Campus, Komaba I	31	39	35.66	139.685	S. Kurata | N. Ishikawa | D. T. Vasques	KOMABA30	https://creativecommons.org/licenses/by/4.0/legalcode	2017/6/28	100
Aucuba Thunb.	2	2021/8/18	en	HumanObservation	Aucuba japonica Thunb. var. japonica	Aucuba japonica Thunb. var. japonica	Plantae	Equisetopsida	Garryales	Garryaceae	Aucuba	japonica	japonica		varietas	Thunberg	accepted	S. Kurata | N. Ishikawa | D. T. Vasques	Japan	Tokyo	Meguro-ku	The University of Tokyo Campus, Komaba I	31	39	35.66	139.685	S. Kurata | N. Ishikawa | D. T. Vasques	KOMABA2	https://creativecommons.org/licenses/by/4.0/legalcode	2018/3/29	100
Berberis L.	245	2021/8/18	en	HumanObservation	Berberis tschonoskyana Regel	Berberis tschonoskyana Regel	Plantae	Equisetopsida	Ranunculales	Berberidaceae	Berberis	tschonoskyana			species	Regel	accepted	S. Kurata | N. Ishikawa | D. T. Vasques	Japan	Tokyo	Meguro-ku	The University of Tokyo Campus, Komaba I	31	39	35.66	139.685	S. Kurata | N. Ishikawa | D. T. Vasques	KOMABA245	https://creativecommons.org/licenses/by/4.0/legalcode	2018/10/2	100
Nandina Thunb.	269	2021/8/18	en	HumanObservation	Nandina domestica Thunb.	Nandina domestica Thunb.	Plantae	Equisetopsida	Ranunculales	Berberidaceae	Nandina	domestica			species	Thunberg	accepted	S. Kurata | N. Ishikawa | D. T. Vasques	Japan	Tokyo	Meguro-ku	The University of Tokyo Campus, Komaba I	31	39	35.66	139.685	S. Kurata | N. Ishikawa | D. T. Vasques	KOMABA269	https://creativecommons.org/licenses/by/4.0/legalcode	2018/6/28	100
Betula L.	258	2021/8/18	en	HumanObservation	Betula platyphylla Sukaczev var. japonica (Miq.) H.Hara	Betula platyphylla Sukaczev var. japonica (Miq.) H.Hara	Plantae	Equisetopsida	Fagales	Betulaceae	Betula	platyphylla	japonica		varietas	(Miquel) H. Hara	accepted	S. Kurata | N. Ishikawa | D. T. Vasques	Japan	Tokyo	Meguro-ku	The University of Tokyo Campus, Komaba I	31	39	35.66	139.685	S. Kurata | N. Ishikawa | D. T. Vasques	KOMABA258	https://creativecommons.org/licenses/by/4.0/legalcode	2019	100
Trigonotis Steven	79	2021/8/18	en	HumanObservation	Trigonotis peduncularis (Trevir.) F.B.Forbes et Hemsl.	Trigonotis peduncularis (Trevir.) F.B.Forbes et Hemsl.	Plantae	Equisetopsida	Boraginales	Boraginaceae	Trigonotis	peduncularis			species	(Treviranus) F.B. Forbes et Hemsley	accepted	S. Kurata | N. Ishikawa | D. T. Vasques	Japan	Tokyo	Meguro-ku	The University of Tokyo Campus, Komaba I	31	39	35.66	139.685	S. Kurata | N. Ishikawa | D. T. Vasques	KOMABA79	https://creativecommons.org/licenses/by/4.0/legalcode	2017/4/21	100
Bothriospermum Bunge	272	2021/8/18	en	HumanObservation	Bothriospermum zeylanicum (J.Jacq.) Druce	Bothriospermum zeylanicum (J.Jacq.) Druce	Plantae	Equisetopsida	Boraginales	Boraginaceae	Bothriospermum	zeylanicum			species	(J. Jacquin) Druce	accepted	S. Kurata | N. Ishikawa | D. T. Vasques	Japan	Tokyo	Meguro-ku	The University of Tokyo Campus, Komaba I	31	39	35.66	139.685	S. Kurata | N. Ishikawa | D. T. Vasques	KOMABA272	https://creativecommons.org/licenses/by/4.0/legalcode	2018/5/2	100
Rorippa Scop.	24	2021/8/18	en	HumanObservation	Rorippa indica (L.) Hiern	Rorippa indica (L.) Hiern	Plantae	Equisetopsida	Brassicales	Brassicaceae	Rorippa	indica			species	(Linnaeus) Hiern	accepted	S. Kurata | N. Ishikawa | D. T. Vasques	Japan	Tokyo	Meguro-ku	The University of Tokyo Campus, Komaba I	31	39	35.66	139.685	S. Kurata | N. Ishikawa | D. T. Vasques	KOMABA24	https://creativecommons.org/licenses/by/4.0/legalcode	2018/5/2	100
Orychophragmus Bunge	39	2021/8/18	en	HumanObservation	Orychophragmus violaceus (L.) O.E.Schulz	Orychophragmus violaceus (L.) O.E.Schulz	Plantae	Equisetopsida	Brassicales	Brassicaceae	Orychophragmus	violaceus			species	(Linnaeus) O.E. Schulz	accepted	S. Kurata | N. Ishikawa | D. T. Vasques	Japan	Tokyo	Meguro-ku	The University of Tokyo Campus, Komaba I	31	39	35.66	139.685	S. Kurata | N. Ishikawa | D. T. Vasques	KOMABA39	https://creativecommons.org/licenses/by/4.0/legalcode	2017/4/14	100
Nasturtium W.T.Aiton	52	2021/8/18	en	HumanObservation	Nasturtium officinale R.Br.	Nasturtium officinale R.Br.	Plantae	Equisetopsida	Brassicales	Brassicaceae	Nasturtium	officinale			species	R. Brown	accepted	S. Kurata | N. Ishikawa | D. T. Vasques	Japan	Tokyo	Meguro-ku	The University of Tokyo Campus, Komaba I	31	39	35.66	139.685	S. Kurata | N. Ishikawa | D. T. Vasques	KOMABA52	https://creativecommons.org/licenses/by/4.0/legalcode	2017/4/21	100
Sisymbrium L.	55	2021/8/18	en	HumanObservation	Sisymbrium officinale (L.) Scop.	Sisymbrium officinale (L.) Scop.	Plantae	Equisetopsida	Brassicales	Brassicaceae	Sisymbrium	officinale			species	(Linnaeus) Scopoli	accepted	S. Kurata | N. Ishikawa | D. T. Vasques	Japan	Tokyo	Meguro-ku	The University of Tokyo Campus, Komaba I	31	39	35.66	139.685	S. Kurata | N. Ishikawa | D. T. Vasques	KOMABA55	https://creativecommons.org/licenses/by/4.0/legalcode	2018/4/20	100
Brassica L.	126	2021/8/18	en	HumanObservation	Brassica napus L.	Brassica napus L.	Plantae	Equisetopsida	Brassicales	Brassicaceae	Brassica	napus			species	Linnaeus	accepted	S. Kurata | N. Ishikawa | D. T. Vasques	Japan	Tokyo	Meguro-ku	The University of Tokyo Campus, Komaba I	31	39	35.66	139.685	S. Kurata | N. Ishikawa | D. T. Vasques	KOMABA126	https://creativecommons.org/licenses/by/4.0/legalcode	2017/4/28	100
Capsella Medik.	150	2021/8/18	en	HumanObservation	Capsella bursa-pastoris (L.) Medik.	Capsella bursa-pastoris (L.) Medik.	Plantae	Equisetopsida	Brassicales	Brassicaceae	Capsella	bursa-pastoris			species	(Linnaeus) Medikus	accepted	S. Kurata | N. Ishikawa | D. T. Vasques	Japan	Tokyo	Meguro-ku	The University of Tokyo Campus, Komaba I	31	39	35.66	139.685	S. Kurata | N. Ishikawa | D. T. Vasques	KOMABA150	https://creativecommons.org/licenses/by/4.0/legalcode	2017/4/14	100
Raphanus L.	172	2021/8/18	en	HumanObservation	Raphanus sativus L. var. hortensis Backer f. raphanistroides Makino	Raphanus sativus L. var. hortensis Backer f. raphanistroides Makino	Plantae	Equisetopsida	Brassicales	Brassicaceae	Raphanus	sativus	raphanistroides		forma	Makino	accepted	S. Kurata | N. Ishikawa | D. T. Vasques	Japan	Tokyo	Meguro-ku	The University of Tokyo Campus, Komaba I	31	39	35.66	139.685	S. Kurata | N. Ishikawa | D. T. Vasques	KOMABA172	https://creativecommons.org/licenses/by/4.0/legalcode	2018/3/29	100
Triodanis Raf.	250	2021/8/18	en	HumanObservation	Triodanis perfoliata (L.) Nieuwl.	Triodanis perfoliata (L.) Nieuwl.	Plantae	Equisetopsida	Asterales	Campanulaceae	Triodanis	perfoliata			species	(Linnaeus) Nieuwland	accepted	S. Kurata | N. Ishikawa | D. T. Vasques	Japan	Tokyo	Meguro-ku	The University of Tokyo Campus, Komaba I	31	39	35.66	139.685	S. Kurata | N. Ishikawa | D. T. Vasques	KOMABA250	https://creativecommons.org/licenses/by/4.0/legalcode	2018/6/5	100
Celtis L.	36	2021/8/18	en	HumanObservation	Celtis sinensis Pers.	Celtis sinensis Pers.	Plantae	Equisetopsida	Rosales	Cannabaceae	Celtis	sinensis			species	Persoon	accepted	S. Kurata | N. Ishikawa | D. T. Vasques	Japan	Tokyo	Meguro-ku	The University of Tokyo Campus, Komaba I	31	39	35.66	139.685	S. Kurata | N. Ishikawa | D. T. Vasques	KOMABA36	https://creativecommons.org/licenses/by/4.0/legalcode	2017/6/16	100
Humulus L.	60	2021/8/18	en	HumanObservation	Humulus scandens (Lour.) Merr.	Humulus scandens (Lour.) Merr.	Plantae	Equisetopsida	Rosales	Cannabaceae	Humulus	scandens			species	(Loureiro) Merrill	accepted	S. Kurata | N. Ishikawa | D. T. Vasques	Japan	Tokyo	Meguro-ku	The University of Tokyo Campus, Komaba I	31	39	35.66	139.685	S. Kurata | N. Ishikawa | D. T. Vasques	KOMABA60	https://creativecommons.org/licenses/by/4.0/legalcode	2017/8/18	100
Aphananthe Planch.	210	2021/8/18	en	HumanObservation	Aphananthe aspera (Thunb.) Planch.	Aphananthe aspera (Thunb.) Planch.	Plantae	Equisetopsida	Rosales	Cannabaceae	Aphananthe	aspera			species	(Thunberg) Planchon	accepted	S. Kurata | N. Ishikawa | D. T. Vasques	Japan	Tokyo	Meguro-ku	The University of Tokyo Campus, Komaba I	31	39	35.66	139.685	S. Kurata | N. Ishikawa | D. T. Vasques	KOMABA210	https://creativecommons.org/licenses/by/4.0/legalcode	2017/8/19	100
Canna L.	70	2021/8/18	en	HumanObservation	Canna x generalis L.H.Bailey	Canna x generalis L.H.Bailey	Plantae	Equisetopsida	Zingiberales	Cannaceae	Canna	x generalis			species	L.H. Bailey	accepted	S. Kurata | N. Ishikawa | D. T. Vasques	Japan	Tokyo	Meguro-ku	The University of Tokyo Campus, Komaba I	31	39	35.66	139.685	S. Kurata | N. Ishikawa | D. T. Vasques	KOMABA70	https://creativecommons.org/licenses/by/4.0/legalcode	2018/8/3	100
Weigela Thunb.	271	2021/8/18	en	HumanObservation	Weigela coraeensis Thunb.	Weigela coraeensis Thunb.	Plantae	Equisetopsida	Dipsacales	Caprifoliaceae	Weigela	coraeensis			species	Thunberg	accepted	S. Kurata | N. Ishikawa | D. T. Vasques	Japan	Tokyo	Meguro-ku	The University of Tokyo Campus, Komaba I	31	39	35.66	139.685	S. Kurata | N. Ishikawa | D. T. Vasques	KOMABA271	https://creativecommons.org/licenses/by/4.0/legalcode	2018/5/11	100
Abelia R.Br.	274	2021/8/18	en	HumanObservation	Abelia x grandiflora (Rovelli ex André) Rehder	Abelia x grandiflora (Rovelli ex André) Rehder	Plantae	Equisetopsida	Dipsacales	Caprifoliaceae	Abelia	x grandiflora			species	(Rovelli ex André) Rehder	accepted	S. Kurata | N. Ishikawa | D. T. Vasques	Japan	Tokyo	Meguro-ku	The University of Tokyo Campus, Komaba I	31	39	35.66	139.685	S. Kurata | N. Ishikawa | D. T. Vasques	KOMABA274	https://creativecommons.org/licenses/by/4.0/legalcode	2018/9/15	100
Lonicera L.	279	2021/8/18	en	HumanObservation	Lonicera japonica Thunb.	Lonicera japonica Thunb.	Plantae	Equisetopsida	Dipsacales	Caprifoliaceae	Lonicera	japonica			species	Thunberg	accepted	S. Kurata | N. Ishikawa | D. T. Vasques	Japan	Tokyo	Meguro-ku	The University of Tokyo Campus, Komaba I	31	39	35.66	139.685	S. Kurata | N. Ishikawa | D. T. Vasques	KOMABA279	https://creativecommons.org/licenses/by/4.0/legalcode	2017/5/16	100
Lonicera L.	304	2021/8/18	en	HumanObservation	Lonicera gracilipes Miq. var. glabra Miq.	Lonicera gracilipes Miq. var. glabra Miq.	Plantae	Equisetopsida	Dipsacales	Caprifoliaceae	Lonicera	gracilipes	glabra		varietas	Miquel	accepted	S. Kurata | N. Ishikawa | D. T. Vasques	Japan	Tokyo	Meguro-ku	The University of Tokyo Campus, Komaba I	31	39	35.66	139.685	S. Kurata | N. Ishikawa | D. T. Vasques	KOMABA304	https://creativecommons.org/licenses/by/4.0/legalcode	2019/4/13	100
Stellaria L.	32	2021/8/18	en	HumanObservation	Stellaria aquatica (L.) Scop.	Stellaria aquatica (L.) Scop.	Plantae	Equisetopsida	Caryophyllales	Caryophyllaceae	Stellaria	aquatica			species	(Linnaeus) Scopoli	accepted	S. Kurata | N. Ishikawa | D. T. Vasques	Japan	Tokyo	Meguro-ku	The University of Tokyo Campus, Komaba I	31	39	35.66	139.685	S. Kurata | N. Ishikawa | D. T. Vasques	KOMABA32	https://creativecommons.org/licenses/by/4.0/legalcode	2017/5/16	100
Cerastium L.	53	2021/8/18	en	HumanObservation	Cerastium glomeratum Thuill.	Cerastium glomeratum Thuill.	Plantae	Equisetopsida	Caryophyllales	Caryophyllaceae	Cerastium	glomeratum			species	Thuillier	accepted	S. Kurata | N. Ishikawa | D. T. Vasques	Japan	Tokyo	Meguro-ku	The University of Tokyo Campus, Komaba I	31	39	35.66	139.685	S. Kurata | N. Ishikawa | D. T. Vasques	KOMABA53	https://creativecommons.org/licenses/by/4.0/legalcode	2017/4/12	100
Sagina L.	137	2021/8/18	en	HumanObservation	Sagina japonica (Sw.) Ohwi	Sagina japonica (Sw.) Ohwi	Plantae	Equisetopsida	Caryophyllales	Caryophyllaceae	Sagina	japonica			species	(Swartz) Ohwi	accepted	S. Kurata | N. Ishikawa | D. T. Vasques	Japan	Tokyo	Meguro-ku	The University of Tokyo Campus, Komaba I	31	39	35.66	139.685	S. Kurata | N. Ishikawa | D. T. Vasques	KOMABA137	https://creativecommons.org/licenses/by/4.0/legalcode	2018/6/2	100
Stellaria L.	208	2021/8/18	en	HumanObservation	Stellaria neglecta Weihe	Stellaria neglecta Weihe	Plantae	Equisetopsida	Caryophyllales	Caryophyllaceae	Stellaria	neglecta			species	Weihe	accepted	S. Kurata | N. Ishikawa | D. T. Vasques	Japan	Tokyo	Meguro-ku	The University of Tokyo Campus, Komaba I	31	39	35.66	139.685	S. Kurata | N. Ishikawa | D. T. Vasques	KOMABA208	https://creativecommons.org/licenses/by/4.0/legalcode	2017/4/20	100
Euonymus L.	202	2021/8/18	en	HumanObservation	Euonymus sieboldianus Blume	Euonymus sieboldianus Blume	Plantae	Equisetopsida	Celastrales	Celastraceae	Euonymus	sieboldianus			species	Blume	accepted	S. Kurata | N. Ishikawa | D. T. Vasques	Japan	Tokyo	Meguro-ku	The University of Tokyo Campus, Komaba I	31	39	35.66	139.685	S. Kurata | N. Ishikawa | D. T. Vasques	KOMABA202	https://creativecommons.org/licenses/by/4.0/legalcode	2018/11/12	100
Commelina L.	138	2021/8/18	en	HumanObservation	Commelina communis L.	Commelina communis L.	Plantae	Equisetopsida	Commelinales	Commelinaceae	Commelina	communis			species	Linnaeus	accepted	S. Kurata | N. Ishikawa | D. T. Vasques	Japan	Tokyo	Meguro-ku	The University of Tokyo Campus, Komaba I	31	39	35.66	139.685	S. Kurata | N. Ishikawa | D. T. Vasques	KOMABA138	https://creativecommons.org/licenses/by/4.0/legalcode	2017/6/16	100
Tradescantia L.	161	2021/8/18	en	HumanObservation	Tradescantia fluminensis Vell.	Tradescantia fluminensis Vell.	Plantae	Equisetopsida	Commelinales	Commelinaceae	Tradescantia	fluminensis			species	Vellozo	accepted	S. Kurata | N. Ishikawa | D. T. Vasques	Japan	Tokyo	Meguro-ku	The University of Tokyo Campus, Komaba I	31	39	35.66	139.685	S. Kurata | N. Ishikawa | D. T. Vasques	KOMABA161	https://creativecommons.org/licenses/by/4.0/legalcode	2017/4/28	100
Tradescantia L.	214	2021/8/18	en	HumanObservation	Tradescantia ohiensis Raf.	Tradescantia ohiensis Raf.	Plantae	Equisetopsida	Commelinales	Commelinaceae	Tradescantia	ohiensis			species	Rafinesque	accepted	S. Kurata | N. Ishikawa | D. T. Vasques	Japan	Tokyo	Meguro-ku	The University of Tokyo Campus, Komaba I	31	39	35.66	139.685	S. Kurata | N. Ishikawa | D. T. Vasques	KOMABA214	https://creativecommons.org/licenses/by/4.0/legalcode	2018/6/2	100
Pollia Thunb.	227	2021/8/18	en	HumanObservation	Pollia japonica Thunb.	Pollia japonica Thunb.	Plantae	Equisetopsida	Commelinales	Commelinaceae	Pollia	japonica			species	Thunberg	accepted	S. Kurata | N. Ishikawa | D. T. Vasques	Japan	Tokyo	Meguro-ku	The University of Tokyo Campus, Komaba I	31	39	35.66	139.685	S. Kurata | N. Ishikawa | D. T. Vasques	KOMABA227	https://creativecommons.org/licenses/by/4.0/legalcode	2017/8/17	100
Calystegia	188	2021/8/18	en	HumanObservation	Calystegia pubescens Lindl.	Calystegia pubescens Lindl.	Plantae	Equisetopsida	Solanales	Convolvulaceae	Calystegia	pubescens			species	Lindley	accepted	S. Kurata | N. Ishikawa | D. T. Vasques	Japan	Tokyo	Meguro-ku	The University of Tokyo Campus, Komaba I	31	39	35.66	139.685	S. Kurata | N. Ishikawa | D. T. Vasques	KOMABA188	https://creativecommons.org/licenses/by/4.0/legalcode	2017/6/16	100
Ipomoea L.	203	2021/8/18	en	HumanObservation	Ipomoea purpurea (L.) Roth	Ipomoea purpurea (L.) Roth	Plantae	Equisetopsida	Solanales	Convolvulaceae	Ipomoea	purpurea			species	(Linnaeus) Roth	accepted	S. Kurata | N. Ishikawa | D. T. Vasques	Japan	Tokyo	Meguro-ku	The University of Tokyo Campus, Komaba I	31	39	35.66	139.685	S. Kurata | N. Ishikawa | D. T. Vasques	KOMABA203	https://creativecommons.org/licenses/by/4.0/legalcode	2018/11/12	100
Cornus L.	293	2021/8/18	en	HumanObservation	Cornus controversa Hemsl. ex Prain	Cornus controversa Hemsl. ex Prain	Plantae	Equisetopsida	Cornales	Cornaceae	Cornus	controversa			species	Hemsley ex Prain	accepted	S. Kurata | N. Ishikawa | D. T. Vasques	Japan	Tokyo	Meguro-ku	The University of Tokyo Campus, Komaba I	31	39	35.66	139.685	S. Kurata | N. Ishikawa | D. T. Vasques	KOMABA293	https://creativecommons.org/licenses/by/4.0/legalcode	2017/4/24	100
Sedum L.	102	2021/8/18	en	HumanObservation	Sedum bulbiferum Makino	Sedum bulbiferum Makino	Plantae	Equisetopsida	Saxifragales	Crassulaceae	Sedum	bulbiferum			species	Makino	accepted	S. Kurata | N. Ishikawa | D. T. Vasques	Japan	Tokyo	Meguro-ku	The University of Tokyo Campus, Komaba I	31	39	35.66	139.685	S. Kurata | N. Ishikawa | D. T. Vasques	KOMABA102	https://creativecommons.org/licenses/by/4.0/legalcode	2018/5/17	100
Gynostemma Blume	13	2021/8/18	en	HumanObservation	Gynostemma pentaphyllum (Thunb.) Makino	Gynostemma pentaphyllum (Thunb.) Makino	Plantae	Equisetopsida	Cucurbitales	Cucurbitaceae	Gynostemma	pentaphyllum			species	(Thunberg) Makino	accepted	S. Kurata | N. Ishikawa | D. T. Vasques	Japan	Tokyo	Meguro-ku	The University of Tokyo Campus, Komaba I	31	39	35.66	139.685	S. Kurata | N. Ishikawa | D. T. Vasques	KOMABA13	https://creativecommons.org/licenses/by/4.0/legalcode	2018/8/20	100
Trichosanthes L.	65	2021/8/18	en	HumanObservation	Trichosanthes cucumeroides (Ser.) Maxim. ex Franch. et Sav.	Trichosanthes cucumeroides (Ser.) Maxim. ex Franch. et Sav.	Plantae	Equisetopsida	Cucurbitales	Cucurbitaceae	Trichosanthes	cucumeroides			species	(Seringe) Maximowicz ex Franchet et Savatier	accepted	S. Kurata | N. Ishikawa | D. T. Vasques	Japan	Tokyo	Meguro-ku	The University of Tokyo Campus, Komaba I	31	39	35.66	139.685	S. Kurata | N. Ishikawa | D. T. Vasques	KOMABA65	https://creativecommons.org/licenses/by/4.0/legalcode	2017/8/19	100
Trichosanthes L.	71	2021/8/18	en	HumanObservation	Trichosanthes kirilowii Maxim. var. japonica (Miq.) Kitam.	Trichosanthes kirilowii Maxim. var. japonica (Miq.) Kitam.	Plantae	Equisetopsida	Cucurbitales	Cucurbitaceae	Trichosanthes	kirilowii	japonica		varietas	(Miquel) Kitamura	accepted	S. Kurata | N. Ishikawa | D. T. Vasques	Japan	Tokyo	Meguro-ku	The University of Tokyo Campus, Komaba I	31	39	35.66	139.685	S. Kurata | N. Ishikawa | D. T. Vasques	KOMABA71	https://creativecommons.org/licenses/by/4.0/legalcode	2017/6/27	100
Platycladus Spach	254	2021/8/18	en	HumanObservation	Platycladus orientalis (L.) Franco	Platycladus orientalis (L.) Franco	Plantae	Equisetopsida	Cupressales	Cupressaceae	Platycladus	orientalis			species	(Linnaeus) Franco	accepted	S. Kurata | N. Ishikawa | D. T. Vasques	Japan	Tokyo	Meguro-ku	The University of Tokyo Campus, Komaba I	31	39	35.66	139.685	S. Kurata | N. Ishikawa | D. T. Vasques	KOMABA254	https://creativecommons.org/licenses/by/4.0/legalcode	2018/6/11	100
Chamaecyparis Spach	284	2021/8/18	en	HumanObservation	Chamaecyparis obtusa (Siebold et Zucc.) Endl.	Chamaecyparis obtusa (Siebold et Zucc.) Endl.	Plantae	Equisetopsida	Cupressales	Cupressaceae	Chamaecyparis	obtusa			species	(Siebold et Zuccarini) Endlicher	accepted	S. Kurata | N. Ishikawa | D. T. Vasques	Japan	Tokyo	Meguro-ku	The University of Tokyo Campus, Komaba I	31	39	35.66	139.685	S. Kurata | N. Ishikawa | D. T. Vasques	KOMABA284	https://creativecommons.org/licenses/by/4.0/legalcode	2018/5/18	100
Metasequoia Hu & W.C.Cheng	297	2021/8/18	en	HumanObservation	Metasequoia glyptostroboides Hu et W.C.Cheng	Metasequoia glyptostroboides Hu et W.C.Cheng	Plantae	Equisetopsida	Cupressales	Cupressaceae	Metasequoia	glyptostroboides			species	Hu et W.C. Cheng	accepted	S. Kurata | N. Ishikawa | D. T. Vasques	Japan	Tokyo	Meguro-ku	The University of Tokyo Campus, Komaba I	31	39	35.66	139.685	S. Kurata | N. Ishikawa | D. T. Vasques	KOMABA297	https://creativecommons.org/licenses/by/4.0/legalcode	2017/8/21	100
Carex L.	10	2021/8/18	en	HumanObservation	Carex dimorpholepis Steud.	Carex dimorpholepis Steud.	Plantae	Equisetopsida	Poales	Cyperaceae	Carex	dimorpholepis			species	Steudel	accepted	S. Kurata | N. Ishikawa | D. T. Vasques	Japan	Tokyo	Meguro-ku	The University of Tokyo Campus, Komaba I	31	39	35.66	139.685	S. Kurata | N. Ishikawa | D. T. Vasques	KOMABA10	https://creativecommons.org/licenses/by/4.0/legalcode	2018/6/2	100
Scirpus L.	11	2021/8/18	en	HumanObservation	Scirpus wichurae Boeck. f. concolor (Maxim.) Ohwi	Scirpus wichurae Boeck. f. concolor (Maxim.) Ohwi	Plantae	Equisetopsida	Poales	Cyperaceae	Scirpus	wichurae	concolor		forma	(Maximowicz) Ohwi	accepted	S. Kurata | N. Ishikawa | D. T. Vasques	Japan	Tokyo	Meguro-ku	The University of Tokyo Campus, Komaba I	31	39	35.66	139.685	S. Kurata | N. Ishikawa | D. T. Vasques	KOMABA11	https://creativecommons.org/licenses/by/4.0/legalcode	2017/8/19	100
Carex L.	35	2021/8/18	en	HumanObservation	Carex aphanolepis Franch. et Sav.	Carex aphanolepis Franch. et Sav.	Plantae	Equisetopsida	Poales	Cyperaceae	Carex	aphanolepis			species	Franchet et Savatier	accepted	S. Kurata | N. Ishikawa | D. T. Vasques	Japan	Tokyo	Meguro-ku	The University of Tokyo Campus, Komaba I	31	39	35.66	139.685	S. Kurata | N. Ishikawa | D. T. Vasques	KOMABA35	https://creativecommons.org/licenses/by/4.0/legalcode	2018/5/2	100
Carex L.	47	2021/8/18	en	HumanObservation	Carex dickinsii Franch. et Sav.	Carex dickinsii Franch. et Sav.	Plantae	Equisetopsida	Poales	Cyperaceae	Carex	dickinsii			species	Franchet et Savatier	accepted	S. Kurata | N. Ishikawa | D. T. Vasques	Japan	Tokyo	Meguro-ku	The University of Tokyo Campus, Komaba I	31	39	35.66	139.685	S. Kurata | N. Ishikawa | D. T. Vasques	KOMABA47	https://creativecommons.org/licenses/by/4.0/legalcode	2018/6/2	100
Cyperus L.	64	2021/8/18	en	HumanObservation	Cyperus microiria Steud.	Cyperus microiria Steud.	Plantae	Equisetopsida	Poales	Cyperaceae	Cyperus	microiria			species	Steudel	accepted	S. Kurata | N. Ishikawa | D. T. Vasques	Japan	Tokyo	Meguro-ku	The University of Tokyo Campus, Komaba I	31	39	35.66	139.685	S. Kurata | N. Ishikawa | D. T. Vasques	KOMABA64	https://creativecommons.org/licenses/by/4.0/legalcode	2018/8/15	100
Carex L.	94	2021/8/18	en	HumanObservation	Carex maximowiczii Miq.	Carex maximowiczii Miq.	Plantae	Equisetopsida	Poales	Cyperaceae	Carex	maximowiczii			species	Miquel	accepted	S. Kurata | N. Ishikawa | D. T. Vasques	Japan	Tokyo	Meguro-ku	The University of Tokyo Campus, Komaba I	31	39	35.66	139.685	S. Kurata | N. Ishikawa | D. T. Vasques	KOMABA94	https://creativecommons.org/licenses/by/4.0/legalcode	2018/5/2	100
Cyperus L.	113	2021/8/18	en	HumanObservation	Cyperus alternifolius L. subsp. flabelliformis Kük.	Cyperus alternifolius L. subsp. flabelliformis Kük.	Plantae	Equisetopsida	Poales	Cyperaceae	Cyperus	alternifolius	flabelliformis		subspecies	Kükenthal	accepted	S. Kurata | N. Ishikawa | D. T. Vasques	Japan	Tokyo	Meguro-ku	The University of Tokyo Campus, Komaba I	31	39	35.66	139.685	S. Kurata | N. Ishikawa | D. T. Vasques	KOMABA113	https://creativecommons.org/licenses/by/4.0/legalcode	2017/8/18	100
Carex L.	149	2021/8/18	en	HumanObservation	Carex lenta D.Don var. lenta	Carex lenta D.Don var. lenta	Plantae	Equisetopsida	Poales	Cyperaceae	Carex	lenta	lenta		varietas	D. Don	accepted	S. Kurata | N. Ishikawa | D. T. Vasques	Japan	Tokyo	Meguro-ku	The University of Tokyo Campus, Komaba I	31	39	35.66	139.685	S. Kurata | N. Ishikawa | D. T. Vasques	KOMABA149	https://creativecommons.org/licenses/by/4.0/legalcode	2018/10/2	100
Carex L.	198	2021/8/18	en	HumanObservation	Carex gibba Wahlenb.	Carex gibba Wahlenb.	Plantae	Equisetopsida	Poales	Cyperaceae	Carex	gibba			species	Wahlenberg	accepted	S. Kurata | N. Ishikawa | D. T. Vasques	Japan	Tokyo	Meguro-ku	The University of Tokyo Campus, Komaba I	31	39	35.66	139.685	S. Kurata | N. Ishikawa | D. T. Vasques	KOMABA198	https://creativecommons.org/licenses/by/4.0/legalcode	2017/7/2	100
Carex L.	222	2021/8/18	en	HumanObservation	Carex rochebrunei Franch. et Sav.	Carex rochebrunei Franch. et Sav.	Plantae	Equisetopsida	Poales	Cyperaceae	Carex	rochebrunei			species	Franchet et Savatier	accepted	S. Kurata | N. Ishikawa | D. T. Vasques	Japan	Tokyo	Meguro-ku	The University of Tokyo Campus, Komaba I	31	39	35.66	139.685	S. Kurata | N. Ishikawa | D. T. Vasques	KOMABA222	https://creativecommons.org/licenses/by/4.0/legalcode	2018/5/18	100
Carex L.	282	2021/8/18	en	HumanObservation	Carex japonica Thunb.	Carex japonica Thunb.	Plantae	Equisetopsida	Poales	Cyperaceae	Carex	japonica			species	Thunberg	accepted	S. Kurata | N. Ishikawa | D. T. Vasques	Japan	Tokyo	Meguro-ku	The University of Tokyo Campus, Komaba I	31	39	35.66	139.685	S. Kurata | N. Ishikawa | D. T. Vasques	KOMABA282	https://creativecommons.org/licenses/by/4.0/legalcode	2018/5/2	100
Dioscorea L.	49	2021/8/18	en	HumanObservation	Dioscorea tokoro Makino	Dioscorea tokoro Makino	Plantae	Equisetopsida	Dioscoreales	Dioscoreaceae	Dioscorea	tokoro			species	Makino	accepted	S. Kurata | N. Ishikawa | D. T. Vasques	Japan	Tokyo	Meguro-ku	The University of Tokyo Campus, Komaba I	31	39	35.66	139.685	S. Kurata | N. Ishikawa | D. T. Vasques	KOMABA49	https://creativecommons.org/licenses/by/4.0/legalcode	2017/8/19	100
Dioscorea L.	229	2021/8/18	en	HumanObservation	Dioscorea japonica Thunb.	Dioscorea japonica Thunb.	Plantae	Equisetopsida	Dioscoreales	Dioscoreaceae	Dioscorea	japonica			species	Thunberg	accepted	S. Kurata | N. Ishikawa | D. T. Vasques	Japan	Tokyo	Meguro-ku	The University of Tokyo Campus, Komaba I	31	39	35.66	139.685	S. Kurata | N. Ishikawa | D. T. Vasques	KOMABA229	https://creativecommons.org/licenses/by/4.0/legalcode	2018/8/15	100
Dioscorea L.	286	2021/8/18	en	HumanObservation	Dioscorea tenuipes Franch. et Sav.	Dioscorea tenuipes Franch. et Sav.	Plantae	Equisetopsida	Dioscoreales	Dioscoreaceae	Dioscorea	tenuipes			species	Franchet et Savatier	accepted	S. Kurata | N. Ishikawa | D. T. Vasques	Japan	Tokyo	Meguro-ku	The University of Tokyo Campus, Komaba I	31	39	35.66	139.685	S. Kurata | N. Ishikawa | D. T. Vasques	KOMABA286	https://creativecommons.org/licenses/by/4.0/legalcode	2017/10/9	100
Cyrtomium C.Presl	141	2021/8/18	en	HumanObservation	Cyrtomium laetevirens (Hiyama) Nakaike	Cyrtomium laetevirens (Hiyama) Nakaike	Plantae	Equisetopsida	Polypodiales	Dryopteridaceae	Cyrtomium	laetevirens			species	(Hiyama) Nakaike	accepted	S. Kurata | N. Ishikawa | D. T. Vasques	Japan	Tokyo	Meguro-ku	The University of Tokyo Campus, Komaba I	31	39	35.66	139.685	S. Kurata | N. Ishikawa | D. T. Vasques	KOMABA141	https://creativecommons.org/licenses/by/4.0/legalcode	2018/6/2	100
Cyrtomium C.Presl	148	2021/8/18	en	HumanObservation	Cyrtomium devexiscapulae (Koidz.) Ching	Cyrtomium devexiscapulae (Koidz.) Ching	Plantae	Equisetopsida	Polypodiales	Dryopteridaceae	Cyrtomium	devexiscapulae			species	(Koidzumi) Ching	accepted	S. Kurata | N. Ishikawa | D. T. Vasques	Japan	Tokyo	Meguro-ku	The University of Tokyo Campus, Komaba I	31	39	35.66	139.685	S. Kurata | N. Ishikawa | D. T. Vasques	KOMABA148	https://creativecommons.org/licenses/by/4.0/legalcode	2018/5/14	100
Dryopteris Adans.	192	2021/8/18	en	HumanObservation	Dryopteris erythrosora (D.C.Eaton) Kuntze	Dryopteris erythrosora (D.C.Eaton) Kuntze	Plantae	Equisetopsida	Polypodiales	Dryopteridaceae	Dryopteris	erythrosora			species	(D.C. Eaton) Kuntze	accepted	S. Kurata | N. Ishikawa | D. T. Vasques	Japan	Tokyo	Meguro-ku	The University of Tokyo Campus, Komaba I	31	39	35.66	139.685	S. Kurata | N. Ishikawa | D. T. Vasques	KOMABA192	https://creativecommons.org/licenses/by/4.0/legalcode	2018/5/2	100
Arachniodes Blume	235	2021/8/18	en	HumanObservation	Arachniodes standishii (T.Moore) Ohwi	Arachniodes standishii (T.Moore) Ohwi	Plantae	Equisetopsida	Polypodiales	Dryopteridaceae	Arachniodes	standishii			species	(T. Moore) Ohwi	accepted	S. Kurata | N. Ishikawa | D. T. Vasques	Japan	Tokyo	Meguro-ku	The University of Tokyo Campus, Komaba I	31	39	35.66	139.685	S. Kurata | N. Ishikawa | D. T. Vasques	KOMABA235	https://creativecommons.org/licenses/by/4.0/legalcode	2018/8/15	100
Diospyros L.	201	2021/8/18	en	HumanObservation	Diospyros lotus L. var. laevis H.Ohba et S.Akiyama	Diospyros lotus L. var. laevis H.Ohba et S.Akiyama	Plantae	Equisetopsida	Ericales	Ebenaceae	Diospyros	lotus	laevis		varietas	H. Ohba et S. Akiyama	accepted	S. Kurata | N. Ishikawa | D. T. Vasques	Japan	Tokyo	Meguro-ku	The University of Tokyo Campus, Komaba I	31	39	35.66	139.685	S. Kurata | N. Ishikawa | D. T. Vasques	KOMABA201	https://creativecommons.org/licenses/by/4.0/legalcode	2017/7/6	100
Elaeagnus L.	151	2021/8/18	en	HumanObservation	Elaeagnus multiflora Thunb. var. multiflora	Elaeagnus multiflora Thunb. var. multiflora	Plantae	Equisetopsida	Rosales	Elaeagnaceae	Elaeagnus	multiflora	multiflora		varietas	Thunberg	accepted	S. Kurata | N. Ishikawa | D. T. Vasques	Japan	Tokyo	Meguro-ku	The University of Tokyo Campus, Komaba I	31	39	35.66	139.685	S. Kurata | N. Ishikawa | D. T. Vasques	KOMABA151	https://creativecommons.org/licenses/by/4.0/legalcode	2018/5/18	100
Equisetum L.	120	2021/8/18	en	HumanObservation	Equisetum arvense L.	Equisetum arvense L.	Plantae	Equisetopsida	Equisetales	Equisetaceae	Equisetum	arvense			species	Linnaeus	accepted	S. Kurata | N. Ishikawa | D. T. Vasques	Japan	Tokyo	Meguro-ku	The University of Tokyo Campus, Komaba I	31	39	35.66	139.685	S. Kurata | N. Ishikawa | D. T. Vasques	KOMABA120	https://creativecommons.org/licenses/by/4.0/legalcode	2018/3/29	100
Rhododendron L.	106	2021/8/18	en	HumanObservation	Rhododendron indicum (L.) Sweet	Rhododendron indicum (L.) Sweet	Plantae	Equisetopsida	Ericales	Ericaceae	Rhododendron	indicum			species	(Linnaeus) Sweet	accepted	S. Kurata | N. Ishikawa | D. T. Vasques	Japan	Tokyo	Meguro-ku	The University of Tokyo Campus, Komaba I	31	39	35.66	139.685	S. Kurata | N. Ishikawa | D. T. Vasques	KOMABA106	https://creativecommons.org/licenses/by/4.0/legalcode	2018/5/18	100
Mallotus Lour.	6	2021/8/18	en	HumanObservation	Mallotus japonicus (L.f.) Müll.Arg.	Mallotus japonicus (L.f.) Müll.Arg.	Plantae	Equisetopsida	Malpighiales	Euphorbiaceae	Mallotus	japonicus			species	(Linnaeus) Müller Argoviensis	accepted	S. Kurata | N. Ishikawa | D. T. Vasques	Japan	Tokyo	Meguro-ku	The University of Tokyo Campus, Komaba I	31	39	35.66	139.685	S. Kurata | N. Ishikawa | D. T. Vasques	KOMABA6	https://creativecommons.org/licenses/by/4.0/legalcode	2018/5/18	100
Acalypha L.	37	2021/8/18	en	HumanObservation	Acalypha australis L.	Acalypha australis L.	Plantae	Equisetopsida	Malpighiales	Euphorbiaceae	Acalypha	australis			species	Linnaeus	accepted	S. Kurata | N. Ishikawa | D. T. Vasques	Japan	Tokyo	Meguro-ku	The University of Tokyo Campus, Komaba I	31	39	35.66	139.685	S. Kurata | N. Ishikawa | D. T. Vasques	KOMABA37	https://creativecommons.org/licenses/by/4.0/legalcode	2017/10/9	100
Euphorbia L.	42	2021/8/18	en	HumanObservation	Euphorbia nutans Lag.	Euphorbia nutans Lag.	Plantae	Equisetopsida	Malpighiales	Euphorbiaceae	Euphorbia	nutans			species	Lagasca	accepted	S. Kurata | N. Ishikawa | D. T. Vasques	Japan	Tokyo	Meguro-ku	The University of Tokyo Campus, Komaba I	31	39	35.66	139.685	S. Kurata | N. Ishikawa | D. T. Vasques	KOMABA42	https://creativecommons.org/licenses/by/4.0/legalcode	2017/8/18	100
Euphorbia L.	98	2021/8/18	en	HumanObservation	Euphorbia maculata L.	Euphorbia maculata L.	Plantae	Equisetopsida	Malpighiales	Euphorbiaceae	Euphorbia	maculata			species	Linnaeus	accepted	S. Kurata | N. Ishikawa | D. T. Vasques	Japan	Tokyo	Meguro-ku	The University of Tokyo Campus, Komaba I	31	39	35.66	139.685	S. Kurata | N. Ishikawa | D. T. Vasques	KOMABA98	https://creativecommons.org/licenses/by/4.0/legalcode	2017/8/18	100
Euphorbia L.	114	2021/8/18	en	HumanObservation	Euphorbia cyathophora Murray	Euphorbia cyathophora Murray	Plantae	Equisetopsida	Malpighiales	Euphorbiaceae	Euphorbia	cyathophora			species	Murray	accepted	S. Kurata | N. Ishikawa | D. T. Vasques	Japan	Tokyo	Meguro-ku	The University of Tokyo Campus, Komaba I	31	39	35.66	139.685	S. Kurata | N. Ishikawa | D. T. Vasques	KOMABA114	https://creativecommons.org/licenses/by/4.0/legalcode	2017/8/18	100
Euphorbia L.	136	2021/8/18	en	HumanObservation	Euphorbia peplus L.	Euphorbia peplus L.	Plantae	Equisetopsida	Malpighiales	Euphorbiaceae	Euphorbia	peplus			species	Linnaeus	accepted	S. Kurata | N. Ishikawa | D. T. Vasques	Japan	Tokyo	Meguro-ku	The University of Tokyo Campus, Komaba I	31	39	35.66	139.685	S. Kurata | N. Ishikawa | D. T. Vasques	KOMABA136	https://creativecommons.org/licenses/by/4.0/legalcode	2017/4/12	100
Euphorbia L.	142	2021/8/18	en	HumanObservation	Euphorbia helioscopia L.	Euphorbia helioscopia L.	Plantae	Equisetopsida	Malpighiales	Euphorbiaceae	Euphorbia	helioscopia			species	Linnaeus	accepted	S. Kurata | N. Ishikawa | D. T. Vasques	Japan	Tokyo	Meguro-ku	The University of Tokyo Campus, Komaba I	31	39	35.66	139.685	S. Kurata | N. Ishikawa | D. T. Vasques	KOMABA142	https://creativecommons.org/licenses/by/4.0/legalcode	2018/3/29	100
Vicia L.	66	2021/8/18	en	HumanObservation	Vicia sativa L. subsp. nigra (L.) Ehrh.	Vicia sativa L. subsp. nigra (L.) Ehrh.	Plantae	Equisetopsida	Fabales	Fabaceae	Vicia	sativa	nigra		subspecies	(Linnaeus) Ehrhart	accepted	S. Kurata | N. Ishikawa | D. T. Vasques	Japan	Tokyo	Meguro-ku	The University of Tokyo Campus, Komaba I	31	39	35.66	139.685	S. Kurata | N. Ishikawa | D. T. Vasques	KOMABA66	https://creativecommons.org/licenses/by/4.0/legalcode	2017/4/14	100
Pueraria DC.	88	2021/8/18	en	HumanObservation	Pueraria lobata (Willd.) Ohwi	Pueraria lobata (Willd.) Ohwi	Plantae	Equisetopsida	Fabales	Fabaceae	Pueraria	lobata			species	(Willdenow) Ohwi	accepted	S. Kurata | N. Ishikawa | D. T. Vasques	Japan	Tokyo	Meguro-ku	The University of Tokyo Campus, Komaba I	31	39	35.66	139.685	S. Kurata | N. Ishikawa | D. T. Vasques	KOMABA88	https://creativecommons.org/licenses/by/4.0/legalcode	2018/6/1	100
Trifolium L.	101	2021/8/18	en	HumanObservation	Trifolium dubium Sibth.	Trifolium dubium Sibth.	Plantae	Equisetopsida	Fabales	Fabaceae	Trifolium	dubium			species	Sibthorp	accepted	S. Kurata | N. Ishikawa | D. T. Vasques	Japan	Tokyo	Meguro-ku	The University of Tokyo Campus, Komaba I	31	39	35.66	139.685	S. Kurata | N. Ishikawa | D. T. Vasques	KOMABA101	https://creativecommons.org/licenses/by/4.0/legalcode	2018/5/18	100
Vicia L.	122	2021/8/18	en	HumanObservation	Vicia hirsuta (L.) Gray	Vicia hirsuta (L.) Gray	Plantae	Equisetopsida	Fabales	Fabaceae	Vicia	hirsuta			species	(Linnaeus) Gray	accepted	S. Kurata | N. Ishikawa | D. T. Vasques	Japan	Tokyo	Meguro-ku	The University of Tokyo Campus, Komaba I	31	39	35.66	139.685	S. Kurata | N. Ishikawa | D. T. Vasques	KOMABA122	https://creativecommons.org/licenses/by/4.0/legalcode	2018/5/2	100
Vicia L.	189	2021/8/18	en	HumanObservation	Vicia villosa Roth subsp. villosa	Vicia villosa Roth subsp. villosa	Plantae	Equisetopsida	Fabales	Fabaceae	Vicia	villosa	villosa		subspecies	Roth	accepted	S. Kurata | N. Ishikawa | D. T. Vasques	Japan	Tokyo	Meguro-ku	The University of Tokyo Campus, Komaba I	31	39	35.66	139.685	S. Kurata | N. Ishikawa | D. T. Vasques	KOMABA189	https://creativecommons.org/licenses/by/4.0/legalcode	2018/5/18	100
Trifolium L.	213	2021/8/18	en	HumanObservation	Trifolium pratense L.	Trifolium pratense L.	Plantae	Equisetopsida	Fabales	Fabaceae	Trifolium	pratense			species	Linnaeus	accepted	S. Kurata | N. Ishikawa | D. T. Vasques	Japan	Tokyo	Meguro-ku	The University of Tokyo Campus, Komaba I	31	39	35.66	139.685	S. Kurata | N. Ishikawa | D. T. Vasques	KOMABA213	https://creativecommons.org/licenses/by/4.0/legalcode	2018/6/2	100
Amphicarpaea Elliott ex Nutt.	226	2021/8/18	en	HumanObservation	Amphicarpaea edgeworthii Benth.	Amphicarpaea edgeworthii Benth.	Plantae	Equisetopsida	Fabales	Fabaceae	Amphicarpaea	edgeworthii			species	Bentham	accepted	S. Kurata | N. Ishikawa | D. T. Vasques	Japan	Tokyo	Meguro-ku	The University of Tokyo Campus, Komaba I	31	39	35.66	139.685	S. Kurata | N. Ishikawa | D. T. Vasques	KOMABA226	https://creativecommons.org/licenses/by/4.0/legalcode	2017/10/9	100
Trifolium L.	259	2021/8/18	en	HumanObservation	Trifolium repens L.	Trifolium repens L.	Plantae	Equisetopsida	Fabales	Fabaceae	Trifolium	repens			species	Linnaeus	accepted	S. Kurata | N. Ishikawa | D. T. Vasques	Japan	Tokyo	Meguro-ku	The University of Tokyo Campus, Komaba I	31	39	35.66	139.685	S. Kurata | N. Ishikawa | D. T. Vasques	KOMABA259	https://creativecommons.org/licenses/by/4.0/legalcode	2018/5/18	100
Vicia L.	268	2021/8/18	en	HumanObservation	Vicia villosa Roth subsp. varia (Host) Corb.	Vicia villosa Roth subsp. varia (Host) Corb.	Plantae	Equisetopsida	Fabales	Fabaceae	Vicia	villosa	varia		subspecies	(Host) Corbière	accepted	S. Kurata | N. Ishikawa | D. T. Vasques	Japan	Tokyo	Meguro-ku	The University of Tokyo Campus, Komaba I	31	39	35.66	139.685	S. Kurata | N. Ishikawa | D. T. Vasques	KOMABA268	https://creativecommons.org/licenses/by/4.0/legalcode	2017/4/28	100
Robinia L.	275	2021/8/18	en	HumanObservation	Robinia pseudoacacia L.	Robinia pseudoacacia L.	Plantae	Equisetopsida	Fabales	Fabaceae	Robinia	pseudoacacia			species	Linnaeus	accepted	S. Kurata | N. Ishikawa | D. T. Vasques	Japan	Tokyo	Meguro-ku	The University of Tokyo Campus, Komaba I	31	39	35.66	139.685	S. Kurata | N. Ishikawa | D. T. Vasques	KOMABA275	https://creativecommons.org/licenses/by/4.0/legalcode	2018/4/20	100
Styphnolobium Schott	280	2021/8/18	en	HumanObservation	Styphnolobium japonicum (L.) Schott	Styphnolobium japonicum (L.) Schott	Plantae	Equisetopsida	Fabales	Fabaceae	Styphnolobium	japonicum			species	(Linnaeus) Schott	accepted	S. Kurata | N. Ishikawa | D. T. Vasques	Japan	Tokyo	Meguro-ku	The University of Tokyo Campus, Komaba I	31	39	35.66	139.685	S. Kurata | N. Ishikawa | D. T. Vasques	KOMABA280	https://creativecommons.org/licenses/by/4.0/legalcode	2017/8/18	100
Quercus L.	97	2021/8/18	en	HumanObservation	Quercus serrata Murray	Quercus serrata Murray	Plantae	Equisetopsida	Fagales	Fagaceae	Quercus	serrata			species	Murray	accepted	S. Kurata | N. Ishikawa | D. T. Vasques	Japan	Tokyo	Meguro-ku	The University of Tokyo Campus, Komaba I	31	39	35.66	139.685	S. Kurata | N. Ishikawa | D. T. Vasques	KOMABA97	https://creativecommons.org/licenses/by/4.0/legalcode	2017/8/18	100
Quercus L.	115	2021/8/18	en	HumanObservation	Quercus myrsinifolia Blume	Quercus myrsinifolia Blume	Plantae	Equisetopsida	Fagales	Fagaceae	Quercus	myrsinifolia			species	Blume	accepted	S. Kurata | N. Ishikawa | D. T. Vasques	Japan	Tokyo	Meguro-ku	The University of Tokyo Campus, Komaba I	31	39	35.66	139.685	S. Kurata | N. Ishikawa | D. T. Vasques	KOMABA115	https://creativecommons.org/licenses/by/4.0/legalcode	2017/7/2	100
Lithocarpus Blume	199	2021/8/18	en	HumanObservation	Lithocarpus edulis (Makino) Nakai	Lithocarpus edulis (Makino) Nakai	Plantae	Equisetopsida	Fagales	Fagaceae	Lithocarpus	edulis			species	(Makino) Nakai	accepted	S. Kurata | N. Ishikawa | D. T. Vasques	Japan	Tokyo	Meguro-ku	The University of Tokyo Campus, Komaba I	31	39	35.66	139.685	S. Kurata | N. Ishikawa | D. T. Vasques	KOMABA199	https://creativecommons.org/licenses/by/4.0/legalcode	2017/7/2	100
Quercus L.	249	2021/8/18	en	HumanObservation	Quercus dentata Thunb.	Quercus dentata Thunb.	Plantae	Equisetopsida	Fagales	Fagaceae	Quercus	dentata			species	Thunberg	accepted	S. Kurata | N. Ishikawa | D. T. Vasques	Japan	Tokyo	Meguro-ku	The University of Tokyo Campus, Komaba I	31	39	35.66	139.685	S. Kurata | N. Ishikawa | D. T. Vasques	KOMABA249	https://creativecommons.org/licenses/by/4.0/legalcode	2017/8/21	100
Geranium L.	16	2021/8/18	en	HumanObservation	Geranium carolinianum L.	Geranium carolinianum L.	Plantae	Equisetopsida	Geraniales	Geraniaceae	Geranium	carolinianum			species	Linnaeus	accepted	S. Kurata | N. Ishikawa | D. T. Vasques	Japan	Tokyo	Meguro-ku	The University of Tokyo Campus, Komaba I	31	39	35.66	139.685	S. Kurata | N. Ishikawa | D. T. Vasques	KOMABA16	https://creativecommons.org/licenses/by/4.0/legalcode	2017/4/28	100
Geranium L.	253	2021/8/18	en	HumanObservation	Geranium thunbergii Siebold ex Lindl. et Paxton	Geranium thunbergii Siebold ex Lindl. et Paxton	Plantae	Equisetopsida	Geraniales	Geraniaceae	Geranium	thunbergii			species	Siebold ex Lindley et Paxton	accepted	S. Kurata | N. Ishikawa | D. T. Vasques	Japan	Tokyo	Meguro-ku	The University of Tokyo Campus, Komaba I	31	39	35.66	139.685	S. Kurata | N. Ishikawa | D. T. Vasques	KOMABA253	https://creativecommons.org/licenses/by/4.0/legalcode	2018/8/20	100
Ginkgo L.	22	2021/8/18	en	HumanObservation	Ginkgo biloba L.	Ginkgo biloba L.	Plantae	Equisetopsida	Ginkgoales	Ginkgoaceae	Ginkgo	biloba			species	Linnaeus	accepted	S. Kurata | N. Ishikawa | D. T. Vasques	Japan	Tokyo	Meguro-ku	The University of Tokyo Campus, Komaba I	31	39	35.66	139.685	S. Kurata | N. Ishikawa | D. T. Vasques	KOMABA22	https://creativecommons.org/licenses/by/4.0/legalcode	2017/7/6	100
Hydrangea L.	56	2021/8/18	en	HumanObservation	Hydrangea macrophylla (Thunb.) Ser. f. normalis (E.H.Wilson) H.Hara	Hydrangea macrophylla (Thunb.) Ser. f. normalis (E.H.Wilson) H.Hara	Plantae	Equisetopsida	Cornales	Hydrangeaceae	Hydrangea	macrophylla	normalis		forma	(E.H. Wilson) H. Hara	accepted	S. Kurata | N. Ishikawa | D. T. Vasques	Japan	Tokyo	Meguro-ku	The University of Tokyo Campus, Komaba I	31	39	35.66	139.685	S. Kurata | N. Ishikawa | D. T. Vasques	KOMABA56	https://creativecommons.org/licenses/by/4.0/legalcode	2018/6/2	100
Hypericum L.	288	2021/8/18	en	HumanObservation	Hypericum monogynum L.	Hypericum monogynum L.	Plantae	Equisetopsida	Malpighiales	Hypericaceae	Hypericum	monogynum			species	Linnaeus	accepted	S. Kurata | N. Ishikawa | D. T. Vasques	Japan	Tokyo	Meguro-ku	The University of Tokyo Campus, Komaba I	31	39	35.66	139.685	S. Kurata | N. Ishikawa | D. T. Vasques	KOMABA288	https://creativecommons.org/licenses/by/4.0/legalcode	2018/6/19	100
Nothoscordum Kunth	168	2021/8/18	en	HumanObservation	Nothoscordum gracile (Dryand.) Stearn	Nothoscordum gracile (Dryand.) Stearn	Plantae	Equisetopsida	Asparagales	Iridaceae	Nothoscordum	gracile			species	(Dryander) Stearn	accepted	S. Kurata | N. Ishikawa | D. T. Vasques	Japan	Tokyo	Meguro-ku	The University of Tokyo Campus, Komaba I	31	39	35.66	139.685	S. Kurata | N. Ishikawa | D. T. Vasques	KOMABA168	https://creativecommons.org/licenses/by/4.0/legalcode	2018/5/2	100
Lycoris Herb.	178	2021/8/18	en	HumanObservation	Lycoris radiata (L'Hér.) Herb.	Lycoris radiata (L'Hér.) Herb.	Plantae	Equisetopsida	Asparagales	Amaryllidaceae	Lycoris	radiata			species	(L'Héritier) Herbert	accepted	S. Kurata | N. Ishikawa | D. T. Vasques	Japan	Tokyo	Meguro-ku	The University of Tokyo Campus, Komaba I	31	39	35.66	139.685	S. Kurata | N. Ishikawa | D. T. Vasques	KOMABA178	https://creativecommons.org/licenses/by/4.0/legalcode	2018/9/15	100
Iris L.	251	2021/8/18	en	HumanObservation	Iris pseudacorus L.	Iris pseudacorus L.	Plantae	Equisetopsida	Asparagales	Iridaceae	Iris	pseudacorus			species	Linnaeus	accepted	S. Kurata | N. Ishikawa | D. T. Vasques	Japan	Tokyo	Meguro-ku	The University of Tokyo Campus, Komaba I	31	39	35.66	139.685	S. Kurata | N. Ishikawa | D. T. Vasques	KOMABA251	https://creativecommons.org/licenses/by/4.0/legalcode	2018/5/2	100
Crocosmia Planch.	277	2021/8/18	en	HumanObservation	Crocosmia x crocosmiiflora (Lemoine) N.E.Br.	Crocosmia x crocosmiiflora (Lemoine) N.E.Br.	Plantae	Equisetopsida	Asparagales	Iridaceae	Crocosmia	x crocosmiiflora			species	(Lemoine) N.E. Brown	accepted	S. Kurata | N. Ishikawa | D. T. Vasques	Japan	Tokyo	Meguro-ku	The University of Tokyo Campus, Komaba I	31	39	35.66	139.685	S. Kurata | N. Ishikawa | D. T. Vasques	KOMABA277	https://creativecommons.org/licenses/by/4.0/legalcode	2018/6/19	100
Juglans L.	46	2021/8/18	en	HumanObservation	Juglans mandshurica Maxim. var. sachalinensis (Komatsu) Kitam.	Juglans mandshurica Maxim. var. sachalinensis (Komatsu) Kitam.	Plantae	Equisetopsida	Fagales	Juglandaceae	Juglans	mandshurica	sachalinensis		varietas	(Komatsu) Kitamura	accepted	S. Kurata | N. Ishikawa | D. T. Vasques	Japan	Tokyo	Meguro-ku	The University of Tokyo Campus, Komaba I	31	39	35.66	139.685	S. Kurata | N. Ishikawa | D. T. Vasques	KOMABA46	https://creativecommons.org/licenses/by/4.0/legalcode	2018/7/21	100
Juncus L.	18	2021/8/18	en	HumanObservation	Juncus decipiens (Buchenau) Nakai	Juncus decipiens (Buchenau) Nakai	Plantae	Equisetopsida	Poales	Juncaceae	Juncus	decipiens			species	(Buchenau) Nakai	accepted	S. Kurata | N. Ishikawa | D. T. Vasques	Japan	Tokyo	Meguro-ku	The University of Tokyo Campus, Komaba I	31	39	35.66	139.685	S. Kurata | N. Ishikawa | D. T. Vasques	KOMABA18	https://creativecommons.org/licenses/by/4.0/legalcode	2018/5/2	100
Juncus L.	85	2021/8/18	en	HumanObservation	Juncus tenuis Willd.	Juncus tenuis Willd.	Plantae	Equisetopsida	Poales	Juncaceae	Juncus	tenuis			species	Willdenow	accepted	S. Kurata | N. Ishikawa | D. T. Vasques	Japan	Tokyo	Meguro-ku	The University of Tokyo Campus, Komaba I	31	39	35.66	139.685	S. Kurata | N. Ishikawa | D. T. Vasques	KOMABA85	https://creativecommons.org/licenses/by/4.0/legalcode	2018/5/18	100
Salvia	108	2021/8/18	en	HumanObservation	Salvia guaranitica A.St.-Hil. ex Benth.	Salvia guaranitica A.St.-Hil. ex Benth.	Plantae	Equisetopsida	Lamiales	Lamiaceae	Salvia	guaranitica			species	A.St-Hilaire ex Bentham	accepted	S. Kurata | N. Ishikawa | D. T. Vasques	Japan	Tokyo	Meguro-ku	The University of Tokyo Campus, Komaba I	31	39	35.66	139.685	S. Kurata | N. Ishikawa | D. T. Vasques	KOMABA108	https://creativecommons.org/licenses/by/4.0/legalcode	2018/6/2	100
Clinopodium L.	144	2021/8/18	en	HumanObservation	Clinopodium gracile (Benth.) Kuntze	Clinopodium gracile (Benth.) Kuntze	Plantae	Equisetopsida	Lamiales	Lamiaceae	Clinopodium	gracile			species	(Bentham) Kuntze	accepted	S. Kurata | N. Ishikawa | D. T. Vasques	Japan	Tokyo	Meguro-ku	The University of Tokyo Campus, Komaba I	31	39	35.66	139.685	S. Kurata | N. Ishikawa | D. T. Vasques	KOMABA144	https://creativecommons.org/licenses/by/4.0/legalcode	2018/5/18	100
Lamium	182	2021/8/18	en	HumanObservation	Lamium purpureum L.	Lamium purpureum L.	Plantae	Equisetopsida	Lamiales	Lamiaceae	Lamium	purpureum			species	Linnaeus	accepted	S. Kurata | N. Ishikawa | D. T. Vasques	Japan	Tokyo	Meguro-ku	The University of Tokyo Campus, Komaba I	31	39	35.66	139.685	S. Kurata | N. Ishikawa | D. T. Vasques	KOMABA182	https://creativecommons.org/licenses/by/4.0/legalcode	2017/4/21	100
Clerodendrum L.	196	2021/8/18	en	HumanObservation	Clerodendrum bungei Steud.	Clerodendrum bungei Steud.	Plantae	Equisetopsida	Lamiales	Lamiaceae	Clerodendrum	bungei			species	Steudel	accepted	S. Kurata | N. Ishikawa | D. T. Vasques	Japan	Tokyo	Meguro-ku	The University of Tokyo Campus, Komaba I	31	39	35.66	139.685	S. Kurata | N. Ishikawa | D. T. Vasques	KOMABA196	https://creativecommons.org/licenses/by/4.0/legalcode	2017/8/19	100
Callicarpa L.	212	2021/8/18	en	HumanObservation	Callicarpa japonica Thunb.	Callicarpa japonica Thunb.	Plantae	Equisetopsida	Lamiales	Lamiaceae	Callicarpa	japonica			species	Thunberg	accepted	S. Kurata | N. Ishikawa | D. T. Vasques	Japan	Tokyo	Meguro-ku	The University of Tokyo Campus, Komaba I	31	39	35.66	139.685	S. Kurata | N. Ishikawa | D. T. Vasques	KOMABA212	https://creativecommons.org/licenses/by/4.0/legalcode	2018/5/18	100
Perilla L.	239	2021/8/18	en	HumanObservation	Perilla frutescens (L.) Britton var. crispa (Benth.) W.Deane f. viridis (Makino) Makino	Perilla frutescens (L.) Britton var. crispa (Benth.) W.Deane f. viridis (Makino) Makino	Plantae	Equisetopsida	Lamiales	Lamiaceae	Perilla	frutescens	viridis		forma	(Makino) Makino	accepted	S. Kurata | N. Ishikawa | D. T. Vasques	Japan	Tokyo	Meguro-ku	The University of Tokyo Campus, Komaba I	31	39	35.66	139.685	S. Kurata | N. Ishikawa | D. T. Vasques	KOMABA239	https://creativecommons.org/licenses/by/4.0/legalcode	2018/10/2	100
Clerodendrum L.	252	2021/8/18	en	HumanObservation	Clerodendrum trichotomum Thunb.	Clerodendrum trichotomum Thunb.	Plantae	Equisetopsida	Lamiales	Lamiaceae	Clerodendrum	trichotomum			species	Thunberg	accepted	S. Kurata | N. Ishikawa | D. T. Vasques	Japan	Tokyo	Meguro-ku	The University of Tokyo Campus, Komaba I	31	39	35.66	139.685	S. Kurata | N. Ishikawa | D. T. Vasques	KOMABA252	https://creativecommons.org/licenses/by/4.0/legalcode	2018/7/21	100
Lindera Thunb.	12	2021/8/18	en	HumanObservation	Lindera praecox (Siebold et Zucc.) Blume	Lindera praecox (Siebold et Zucc.) Blume	Plantae	Equisetopsida	Laurales	Lauraceae	Lindera	praecox			species	(Siebold et Zuccarini) Blume	accepted	S. Kurata | N. Ishikawa | D. T. Vasques	Japan	Tokyo	Meguro-ku	The University of Tokyo Campus, Komaba I	31	39	35.66	139.685	S. Kurata | N. Ishikawa | D. T. Vasques	KOMABA12	https://creativecommons.org/licenses/by/4.0/legalcode	2018/11/12	100
Cinnamomum Schaeff.	89	2021/8/18	en	HumanObservation	Cinnamomum camphora (L.) J.Presl	Cinnamomum camphora (L.) J.Presl	Plantae	Equisetopsida	Laurales	Lauraceae	Cinnamomum	camphora			species	(Linnaeus) J. Presl	accepted	S. Kurata | N. Ishikawa | D. T. Vasques	Japan	Tokyo	Meguro-ku	The University of Tokyo Campus, Komaba I	31	39	35.66	139.685	S. Kurata | N. Ishikawa | D. T. Vasques	KOMABA89	https://creativecommons.org/licenses/by/4.0/legalcode	2017/5/16	100
Neolitsea (Benth.) Merr.	116	2021/8/18	en	HumanObservation	Neolitsea sericea (Blume) Koidz.	Neolitsea sericea (Blume) Koidz.	Plantae	Equisetopsida	Laurales	Lauraceae	Neolitsea	sericea			species	(Blume) Koidzumi	accepted	S. Kurata | N. Ishikawa | D. T. Vasques	Japan	Tokyo	Meguro-ku	The University of Tokyo Campus, Komaba I	31	39	35.66	139.685	S. Kurata | N. Ishikawa | D. T. Vasques	KOMABA116	https://creativecommons.org/licenses/by/4.0/legalcode	2017/6/28	100
Lygodium Sw.	61	2021/8/18	en	HumanObservation	Lygodium japonicum (Thunb.) Sw.	Lygodium japonicum (Thunb.) Sw.	Plantae	Equisetopsida	Schizaeales	Lygodiaceae	Lygodium	japonicum			species	(Thunberg) Swartz	accepted	S. Kurata | N. Ishikawa | D. T. Vasques	Japan	Tokyo	Meguro-ku	The University of Tokyo Campus, Komaba I	31	39	35.66	139.685	S. Kurata | N. Ishikawa | D. T. Vasques	KOMABA61	https://creativecommons.org/licenses/by/4.0/legalcode	2018/7/27	100
Punica L.	103	2021/8/18	en	HumanObservation	Punica granatum L.	Punica granatum L.	Plantae	Equisetopsida	Myrtales	Lythraceae	Punica	granatum			species	Linnaeus	accepted	S. Kurata | N. Ishikawa | D. T. Vasques	Japan	Tokyo	Meguro-ku	The University of Tokyo Campus, Komaba I	31	39	35.66	139.685	S. Kurata | N. Ishikawa | D. T. Vasques	KOMABA103	https://creativecommons.org/licenses/by/4.0/legalcode	2018/6/11	100
Lagerstroemia L.	107	2021/8/18	en	HumanObservation	Lagerstroemia indica L.	Lagerstroemia indica L.	Plantae	Equisetopsida	Myrtales	Lythraceae	Lagerstroemia	indica			species	Linnaeus	accepted	S. Kurata | N. Ishikawa | D. T. Vasques	Japan	Tokyo	Meguro-ku	The University of Tokyo Campus, Komaba I	31	39	35.66	139.685	S. Kurata | N. Ishikawa | D. T. Vasques	KOMABA107	https://creativecommons.org/licenses/by/4.0/legalcode	2018/7/21	100
Magnolia L.	255	2021/8/18	en	HumanObservation	Magnolia kobus DC.	Magnolia kobus DC.	Plantae	Equisetopsida	Magnoliales	Magnoliaceae	Magnolia	kobus			species	Candolle	accepted	S. Kurata | N. Ishikawa | D. T. Vasques	Japan	Tokyo	Meguro-ku	The University of Tokyo Campus, Komaba I	31	39	35.66	139.685	S. Kurata | N. Ishikawa | D. T. Vasques	KOMABA255	https://creativecommons.org/licenses/by/4.0/legalcode	2018/8/15	100
Magnolia L.	263	2021/8/18	en	HumanObservation	Magnolia grandiflora L.	Magnolia grandiflora L.	Plantae	Equisetopsida	Magnoliales	Magnoliaceae	Magnolia	grandiflora			species	Linnaeus	accepted	S. Kurata | N. Ishikawa | D. T. Vasques	Japan	Tokyo	Meguro-ku	The University of Tokyo Campus, Komaba I	31	39	35.66	139.685	S. Kurata | N. Ishikawa | D. T. Vasques	KOMABA263	https://creativecommons.org/licenses/by/4.0/legalcode	2018/6/5	100
Magnolia L.	292	2021/8/18	en	HumanObservation	Magnolia obovata Thunb.	Magnolia obovata Thunb.	Plantae	Equisetopsida	Magnoliales	Magnoliaceae	Magnolia	obovata			species	Thunberg	accepted	S. Kurata | N. Ishikawa | D. T. Vasques	Japan	Tokyo	Meguro-ku	The University of Tokyo Campus, Komaba I	31	39	35.66	139.685	S. Kurata | N. Ishikawa | D. T. Vasques	KOMABA292	https://creativecommons.org/licenses/by/4.0/legalcode	2017/10/9	100
Firmiana Marsili	3	2021/8/18	en	HumanObservation	Firmiana simplex (L.) W.F.Wight	Firmiana simplex (L.) W.F.Wight	Plantae	Equisetopsida	Malvales	Malvaceae	Firmiana	simplex			species	(Linnaeus) W.F. Wight	accepted	S. Kurata | N. Ishikawa | D. T. Vasques	Japan	Tokyo	Meguro-ku	The University of Tokyo Campus, Komaba I	31	39	35.66	139.685	S. Kurata | N. Ishikawa | D. T. Vasques	KOMABA3	https://creativecommons.org/licenses/by/4.0/legalcode	2017/8/18	100
Alcea L.	129	2021/8/18	en	HumanObservation	Alcea rosea L.	Alcea rosea L.	Plantae	Equisetopsida	Malvales	Malvaceae	Alcea	rosea			species	Linnaeus	accepted	S. Kurata | N. Ishikawa | D. T. Vasques	Japan	Tokyo	Meguro-ku	The University of Tokyo Campus, Komaba I	31	39	35.66	139.685	S. Kurata | N. Ishikawa | D. T. Vasques	KOMABA129	https://creativecommons.org/licenses/by/4.0/legalcode	2018/6/2	100
Broussonetia L'Hér. ex Vent.	57	2021/8/18	en	HumanObservation	Broussonetia papyrifera (L.) L'Hér. ex Vent.	Broussonetia papyrifera (L.) L'Hér. ex Vent.	Plantae	Equisetopsida	Rosales	Moraceae	Broussonetia	papyrifera			species	(Linnaeus) L'Héritier ex Ventenat	accepted	S. Kurata | N. Ishikawa | D. T. Vasques	Japan	Tokyo	Meguro-ku	The University of Tokyo Campus, Komaba I	31	39	35.66	139.685	S. Kurata | N. Ishikawa | D. T. Vasques	KOMABA57	https://creativecommons.org/licenses/by/4.0/legalcode	2017/8/19	100
Fatoua Gaudich.	91	2021/8/18	en	HumanObservation	Fatoua villosa (Thunb.) Nakai	Fatoua villosa (Thunb.) Nakai	Plantae	Equisetopsida	Rosales	Moraceae	Fatoua	villosa			species	(Thunberg) Nakai	accepted	S. Kurata | N. Ishikawa | D. T. Vasques	Japan	Tokyo	Meguro-ku	The University of Tokyo Campus, Komaba I	31	39	35.66	139.685	S. Kurata | N. Ishikawa | D. T. Vasques	KOMABA91	https://creativecommons.org/licenses/by/4.0/legalcode	2017/10/9	100
Morella Lour.	231	2021/8/18	en	HumanObservation	Morella rubra Lour.	Morella rubra Lour.	Plantae	Equisetopsida	Fagales	Myricaceae	Morella	rubra			species	Loureiro	accepted	S. Kurata | N. Ishikawa | D. T. Vasques	Japan	Tokyo	Meguro-ku	The University of Tokyo Campus, Komaba I	31	39	35.66	139.685	S. Kurata | N. Ishikawa | D. T. Vasques	KOMABA231	https://creativecommons.org/licenses/by/4.0/legalcode	2017/8/18	100
Mirabilis L.	45	2021/8/18	en	HumanObservation	Mirabilis jalapa L.	Mirabilis jalapa L.	Plantae	Equisetopsida	Caryophyllales	Nyctaginaceae	Mirabilis	jalapa			species	Carl Linnaeus	accepted	S. Kurata | N. Ishikawa | D. T. Vasques	Japan	Tokyo	Meguro-ku	The University of Tokyo Campus, Komaba I	31	39	35.66	139.685	S. Kurata | N. Ishikawa | D. T. Vasques	KOMABA45	https://creativecommons.org/licenses/by/4.0/legalcode	2017/8/18	100
Ligustrum L.	143	2021/8/18	en	HumanObservation	Ligustrum lucidum Aiton	Ligustrum lucidum Aiton	Plantae	Equisetopsida	Lamiales	Oleaceae	Ligustrum	lucidum			species	Aiton	accepted	S. Kurata | N. Ishikawa | D. T. Vasques	Japan	Tokyo	Meguro-ku	The University of Tokyo Campus, Komaba I	31	39	35.66	139.685	S. Kurata | N. Ishikawa | D. T. Vasques	KOMABA143	https://creativecommons.org/licenses/by/4.0/legalcode	2017/8/18	100
Oenothera L.	298	2021/8/18	en	HumanObservation	Oenothera biennis L.	Oenothera biennis L.	Plantae	Equisetopsida	Myrtales	Onagraceae	Oenothera	biennis			species	Linnaeus	accepted	S. Kurata | N. Ishikawa | D. T. Vasques	Japan	Tokyo	Meguro-ku	The University of Tokyo Campus, Komaba I	31	39	35.66	139.685	S. Kurata | N. Ishikawa | D. T. Vasques	KOMABA298	https://creativecommons.org/licenses/by/4.0/legalcode	2018/8/20	100
Cephalanthera Rich.	84	2021/8/18	en	HumanObservation	Cephalanthera erecta (Thunb.) Blume	Cephalanthera erecta (Thunb.) Blume	Plantae	Equisetopsida	Asparagales	Orchidaceae	Cephalanthera	erecta			species	(Thunberg) Blume	accepted	S. Kurata | N. Ishikawa | D. T. Vasques	Japan	Tokyo	Meguro-ku	The University of Tokyo Campus, Komaba I	31	39	35.66	139.685	S. Kurata | N. Ishikawa | D. T. Vasques	KOMABA84	https://creativecommons.org/licenses/by/4.0/legalcode	2018/6/11	100
Spiranthes Rich.	278	2021/8/18	en	HumanObservation	Spiranthes sinensis (Pers.) Ames var. amoena (M.Bieb.) H.Hara	Spiranthes sinensis (Pers.) Ames var. amoena (M.Bieb.) H.Hara	Plantae	Equisetopsida	Asparagales	Orchidaceae	Spiranthes	sinensis	amoena		varietas	(M. Bieberstein) H.Hara	accepted	S. Kurata | N. Ishikawa | D. T. Vasques	Japan	Tokyo	Meguro-ku	The University of Tokyo Campus, Komaba I	31	39	35.66	139.685	S. Kurata | N. Ishikawa | D. T. Vasques	KOMABA278	https://creativecommons.org/licenses/by/4.0/legalcode	2017/6/27	100
Orobanche L.	219	2021/8/18	en	HumanObservation	Orobanche minor Sm.	Orobanche minor Sm.	Plantae	Equisetopsida	Lamiales	Orobanchaceae	Orobanche	minor			species	Smith	accepted	S. Kurata | N. Ishikawa | D. T. Vasques	Japan	Tokyo	Meguro-ku	The University of Tokyo Campus, Komaba I	31	39	35.66	139.685	S. Kurata | N. Ishikawa | D. T. Vasques	KOMABA219	https://creativecommons.org/licenses/by/4.0/legalcode	2017/5/16	100
Oxalis L.	44	2021/8/18	en	HumanObservation	Oxalis triangularis A.St.Hil.	Oxalis triangularis A.St.Hil.	Plantae	Equisetopsida	Oxalidales	Oxalidaceae	Oxalis	triangularis			species	A.St-Hilaire	accepted	S. Kurata | N. Ishikawa | D. T. Vasques	Japan	Tokyo	Meguro-ku	The University of Tokyo Campus, Komaba I	31	39	35.66	139.685	S. Kurata | N. Ishikawa | D. T. Vasques	KOMABA44	https://creativecommons.org/licenses/by/4.0/legalcode	2018/6/2	100
Oxalis L.	59	2021/8/18	en	HumanObservation	Oxalis corniculata L.	Oxalis corniculata L.	Plantae	Equisetopsida	Oxalidales	Oxalidaceae	Oxalis	corniculata			species	Linnaeus	accepted	S. Kurata | N. Ishikawa | D. T. Vasques	Japan	Tokyo	Meguro-ku	The University of Tokyo Campus, Komaba I	31	39	35.66	139.685	S. Kurata | N. Ishikawa | D. T. Vasques	KOMABA59	https://creativecommons.org/licenses/by/4.0/legalcode	2017/4/20	100
Oxalis L.	273	2021/8/18	en	HumanObservation	Oxalis bowiei W.T.Aiton ex G.Don	Oxalis bowiei W.T.Aiton ex G.Don	Plantae	Equisetopsida	Oxalidales	Oxalidaceae	Oxalis	bowiei			species	W.T. Aiton ex G. Don	accepted	S. Kurata | N. Ishikawa | D. T. Vasques	Japan	Tokyo	Meguro-ku	The University of Tokyo Campus, Komaba I	31	39	35.66	139.685	S. Kurata | N. Ishikawa | D. T. Vasques	KOMABA273	https://creativecommons.org/licenses/by/4.0/legalcode	2018/10/2	100
Oxalis L.	296	2021/8/18	en	HumanObservation	Oxalis debilis Kunth subsp. corymbosa (DC.) Lourteig	Oxalis debilis Kunth subsp. corymbosa (DC.) Lourteig	Plantae	Equisetopsida	Oxalidales	Oxalidaceae	Oxalis	debilis	corymbosa		subspecies	(Candolle) Lourteig	accepted	S. Kurata | N. Ishikawa | D. T. Vasques	Japan	Tokyo	Meguro-ku	The University of Tokyo Campus, Komaba I	31	39	35.66	139.685	S. Kurata | N. Ishikawa | D. T. Vasques	KOMABA296	https://creativecommons.org/licenses/by/4.0/legalcode	2017/4/28	100
Orobanche L.	73	2021/8/18	en	HumanObservation	Corydalis heterocarpa Siebold et Zucc. var. japonica (Franch. et Sav.) Ohwi	Corydalis heterocarpa Siebold et Zucc. var. japonica (Franch. et Sav.) Ohwi	Plantae	Equisetopsida	Ranunculales	Papaveraceae	Corydalis	heterocarpa	japonica		varietas	(Franchet et Savatier) Ohwi	accepted	S. Kurata | N. Ishikawa | D. T. Vasques	Japan	Tokyo	Meguro-ku	The University of Tokyo Campus, Komaba I	31	39	35.66	139.685	S. Kurata | N. Ishikawa | D. T. Vasques	KOMABA73	https://creativecommons.org/licenses/by/4.0/legalcode	2018/3/29	100
Chelidonium L.	87	2021/8/18	en	HumanObservation	Chelidonium majus L. subsp. asiaticum H.Hara	Chelidonium majus L. subsp. asiaticum H.Hara	Plantae	Equisetopsida	Ranunculales	Papaveraceae	Chelidonium	majus	asiaticum		subspecies	H. Hara	accepted	S. Kurata | N. Ishikawa | D. T. Vasques	Japan	Tokyo	Meguro-ku	The University of Tokyo Campus, Komaba I	31	39	35.66	139.685	S. Kurata | N. Ishikawa | D. T. Vasques	KOMABA87	https://creativecommons.org/licenses/by/4.0/legalcode	2018/5/18	100
Orobanche L.	211	2021/8/18	en	HumanObservation	Corydalis incisa (Thunb.) Pers.	Corydalis incisa (Thunb.) Pers.	Plantae	Equisetopsida	Ranunculales	Papaveraceae	Corydalis	incisa			species	(Thunberg) Persoon	accepted	S. Kurata | N. Ishikawa | D. T. Vasques	Japan	Tokyo	Meguro-ku	The University of Tokyo Campus, Komaba I	31	39	35.66	139.685	S. Kurata | N. Ishikawa | D. T. Vasques	KOMABA211	https://creativecommons.org/licenses/by/4.0/legalcode	2017/4/21	100
Macleaya R.Br.	265	2021/8/18	en	HumanObservation	Macleaya cordata (Willd.) R.Br.	Macleaya cordata (Willd.) R.Br.	Plantae	Equisetopsida	Ranunculales	Papaveraceae	Macleaya	cordata			species	(Willdenow) R. Brown	accepted	S. Kurata | N. Ishikawa | D. T. Vasques	Japan	Tokyo	Meguro-ku	The University of Tokyo Campus, Komaba I	31	39	35.66	139.685	S. Kurata | N. Ishikawa | D. T. Vasques	KOMABA265	https://creativecommons.org/licenses/by/4.0/legalcode	2017/8/18	100
Papaver L.	303	2021/8/18	en	HumanObservation	Papaver dubium L.	Papaver dubium L.	Plantae	Equisetopsida	Ranunculales	Papaveraceae	Papaver	dubium			species	Linnaeus	accepted	S. Kurata | N. Ishikawa | D. T. Vasques	Japan	Tokyo	Meguro-ku	The University of Tokyo Campus, Komaba I	31	39	35.66	139.685	S. Kurata | N. Ishikawa | D. T. Vasques	KOMABA303	https://creativecommons.org/licenses/by/4.0/legalcode	2019/4/13	100
Eurya Thunb.	173	2021/8/18	en	HumanObservation	Eurya emarginata (Thunb.) Makino	Eurya emarginata (Thunb.) Makino	Plantae	Equisetopsida	Ericales	Pentaphylacaceae	Eurya	emarginata			species	(Thunberg) Makino	accepted	S. Kurata | N. Ishikawa | D. T. Vasques	Japan	Tokyo	Meguro-ku	The University of Tokyo Campus, Komaba I	31	39	35.66	139.685	S. Kurata | N. Ishikawa | D. T. Vasques	KOMABA173	https://creativecommons.org/licenses/by/4.0/legalcode	2018/11/12	100
Mazus Lour.	145	2021/8/18	en	HumanObservation	Mazus pumilus (Burm.f.) Steenis	Mazus pumilus (Burm.f.) Steenis	Plantae	Equisetopsida	Lamiales	Phrymaceae	Mazus	pumilus			species	(Burman) Steenis	accepted	S. Kurata | N. Ishikawa | D. T. Vasques	Japan	Tokyo	Meguro-ku	The University of Tokyo Campus, Komaba I	31	39	35.66	139.685	S. Kurata | N. Ishikawa | D. T. Vasques	KOMABA145	https://creativecommons.org/licenses/by/4.0/legalcode	2017/4/13	100
Phyllanthus L.	256	2021/8/18	en	HumanObservation	Phyllanthus lepidocarpus Siebold et Zucc.	Phyllanthus lepidocarpus Siebold et Zucc.	Plantae	Equisetopsida	Malpighiales	Phyllanthaceae	Phyllanthus	lepidocarpus			species	Siebold et Zuccarini	accepted	S. Kurata | N. Ishikawa | D. T. Vasques	Japan	Tokyo	Meguro-ku	The University of Tokyo Campus, Komaba I	31	39	35.66	139.685	S. Kurata | N. Ishikawa | D. T. Vasques	KOMABA256	https://creativecommons.org/licenses/by/4.0/legalcode	2017/10/9	100
Phytolacca L.	233	2021/8/18	en	HumanObservation	Phytolacca americana L.	Phytolacca americana L.	Plantae	Equisetopsida	Caryophyllales	Phytolaccaceae	Phytolacca	americana			species	Linnaeus	accepted	S. Kurata | N. Ishikawa | D. T. Vasques	Japan	Tokyo	Meguro-ku	The University of Tokyo Campus, Komaba I	31	39	35.66	139.685	S. Kurata | N. Ishikawa | D. T. Vasques	KOMABA233	https://creativecommons.org/licenses/by/4.0/legalcode	2018/6/2	100
Pinus L.	90	2021/8/18	en	HumanObservation	Pinus thunbergii Parl.	Pinus thunbergii Parl.	Plantae	Equisetopsida	Pinales	Pinaceae	Pinus	thunbergii			species	Parlatore	accepted	S. Kurata | N. Ishikawa | D. T. Vasques	Japan	Tokyo	Meguro-ku	The University of Tokyo Campus, Komaba I	31	39	35.66	139.685	S. Kurata | N. Ishikawa | D. T. Vasques	KOMABA90	https://creativecommons.org/licenses/by/4.0/legalcode	2018/10/2	100
Cedrus Trew	179	2021/8/18	en	HumanObservation	Cedrus deodara (Roxb.) G.Don	Cedrus deodara (Roxb.) G.Don	Plantae	Equisetopsida	Pinales	Pinaceae	Cedrus	deodara			species	(Roxburgh ex D. Don) G. Don	accepted	S. Kurata | N. Ishikawa | D. T. Vasques	Japan	Tokyo	Meguro-ku	The University of Tokyo Campus, Komaba I	31	39	35.66	139.685	S. Kurata | N. Ishikawa | D. T. Vasques	KOMABA179	https://creativecommons.org/licenses/by/4.0/legalcode	2018/10/2	100
Plantago L.	43	2021/8/18	en	HumanObservation	Plantago asiatica L.	Plantago asiatica L.	Plantae	Equisetopsida	Lamiales	Plantaginaceae	Plantago	asiatica			species	Linnaeus	accepted	S. Kurata | N. Ishikawa | D. T. Vasques	Japan	Tokyo	Meguro-ku	The University of Tokyo Campus, Komaba I	31	39	35.66	139.685	S. Kurata | N. Ishikawa | D. T. Vasques	KOMABA43	https://creativecommons.org/licenses/by/4.0/legalcode	2017/5/16	100
Plantago L.	290	2021/8/18	en	HumanObservation	Plantago lanceolata L.	Plantago lanceolata L.	Plantae	Equisetopsida	Lamiales	Plantaginaceae	Plantago	lanceolata			species	Linnaeus	accepted	S. Kurata | N. Ishikawa | D. T. Vasques	Japan	Tokyo	Meguro-ku	The University of Tokyo Campus, Komaba I	31	39	35.66	139.685	S. Kurata | N. Ishikawa | D. T. Vasques	KOMABA290	https://creativecommons.org/licenses/by/4.0/legalcode	2018/5/2	100
Platanus L.	240	2021/8/18	en	HumanObservation	Platanus occidentalis L.	Platanus occidentalis L.	Plantae	Equisetopsida	Proteales	Platanaceae	Platanus	occidentalis			species	Linnaeus	accepted	S. Kurata | N. Ishikawa | D. T. Vasques	Japan	Tokyo	Meguro-ku	The University of Tokyo Campus, Komaba I	31	39	35.66	139.685	S. Kurata | N. Ishikawa | D. T. Vasques	KOMABA240	https://creativecommons.org/licenses/by/4.0/legalcode	2017/10/9	100
Elymus L.	1	2021/8/18	en	HumanObservation	Elymus racemifer (Steud.) Tzvelev var. racemifer	Elymus racemifer (Steud.) Tzvelev var. racemifer	Plantae	Equisetopsida	Poales	Poaceae	Elymus	racemifer	racemifer		varietas	(Steudel) Tzvelev	accepted	S. Kurata | N. Ishikawa | D. T. Vasques	Japan	Tokyo	Meguro-ku	The University of Tokyo Campus, Komaba I	31	39	35.66	139.685	S. Kurata | N. Ishikawa | D. T. Vasques	KOMABA1	https://creativecommons.org/licenses/by/4.0/legalcode	2018/5/2	100
Pennisetum Rich.	4	2021/8/18	en	HumanObservation	Pennisetum alopecuroides (L.) Spreng. f. viridescens (Miq.) Ohwi	Pennisetum alopecuroides (L.) Spreng. f. viridescens (Miq.) Ohwi	Plantae	Equisetopsida	Poales	Poaceae	Pennisetum	alopecuroides	viridescens		forma	(Miquel) Ohwi	accepted	S. Kurata | N. Ishikawa | D. T. Vasques	Japan	Tokyo	Meguro-ku	The University of Tokyo Campus, Komaba I	31	39	35.66	139.685	S. Kurata | N. Ishikawa | D. T. Vasques	KOMABA4	https://creativecommons.org/licenses/by/4.0/legalcode	2018/10/2	100
Setaria P.Beauv.	8	2021/8/18	en	HumanObservation	Setaria faberi R.A.W.Herrm.	Setaria faberi R.A.W.Herrm.	Plantae	Equisetopsida	Poales	Poaceae	Setaria	faberi			species	R.A.W. Herrmann	accepted	S. Kurata | N. Ishikawa | D. T. Vasques	Japan	Tokyo	Meguro-ku	The University of Tokyo Campus, Komaba I	31	39	35.66	139.685	S. Kurata | N. Ishikawa | D. T. Vasques	KOMABA8	https://creativecommons.org/licenses/by/4.0/legalcode	2017/8/19	100
Setaria P.Beauv.	23	2021/8/18	en	HumanObservation	Setaria chondrachne (Steud.) Honda	Setaria chondrachne (Steud.) Honda	Plantae	Equisetopsida	Poales	Poaceae	Setaria	chondrachne			species	(Steudel) Honda	accepted	S. Kurata | N. Ishikawa | D. T. Vasques	Japan	Tokyo	Meguro-ku	The University of Tokyo Campus, Komaba I	31	39	35.66	139.685	S. Kurata | N. Ishikawa | D. T. Vasques	KOMABA23	https://creativecommons.org/licenses/by/4.0/legalcode	2018/8/15	100
Echinochloa P.Beauv.	27	2021/8/18	en	HumanObservation	Echinochloa crus-galli (L.) P.Beauv. var. crus-galli	Echinochloa crus-galli (L.) P.Beauv. var. crus-galli	Plantae	Equisetopsida	Poales	Poaceae	Echinochloa	crus-galli	crus-galli		varietas	(Linnaeus) P. Beauvois	accepted	S. Kurata | N. Ishikawa | D. T. Vasques	Japan	Tokyo	Meguro-ku	The University of Tokyo Campus, Komaba I	31	39	35.66	139.685	S. Kurata | N. Ishikawa | D. T. Vasques	KOMABA27	https://creativecommons.org/licenses/by/4.0/legalcode	2018/7/21	100
Bromus L.	29	2021/8/18	en	HumanObservation	Bromus catharticus Vahl	Bromus catharticus Vahl	Plantae	Equisetopsida	Poales	Poaceae	Bromus	catharticus			species	Vahl	accepted	S. Kurata | N. Ishikawa | D. T. Vasques	Japan	Tokyo	Meguro-ku	The University of Tokyo Campus, Komaba I	31	39	35.66	139.685	S. Kurata | N. Ishikawa | D. T. Vasques	KOMABA29	https://creativecommons.org/licenses/by/4.0/legalcode	2018/5/2	100
Setaria P.Beauv.	38	2021/8/18	en	HumanObservation	Setaria viridis (L.) P.Beauv.	Setaria viridis (L.) P.Beauv.	Plantae	Equisetopsida	Poales	Poaceae	Setaria	viridis			species	(Linnaeus) P. Beauvois	accepted	S. Kurata | N. Ishikawa | D. T. Vasques	Japan	Tokyo	Meguro-ku	The University of Tokyo Campus, Komaba I	31	39	35.66	139.685	S. Kurata | N. Ishikawa | D. T. Vasques	KOMABA38	https://creativecommons.org/licenses/by/4.0/legalcode	2017/7/2	100
Poa L.	41	2021/8/18	en	HumanObservation	Poa trivialis L.	Poa trivialis L.	Plantae	Equisetopsida	Poales	Poaceae	Poa	trivialis			species	Linnaeus	accepted	S. Kurata | N. Ishikawa | D. T. Vasques	Japan	Tokyo	Meguro-ku	The University of Tokyo Campus, Komaba I	31	39	35.66	139.685	S. Kurata | N. Ishikawa | D. T. Vasques	KOMABA41	https://creativecommons.org/licenses/by/4.0/legalcode	2018/5/2	100
Eleusine Gaertn.	50	2021/8/18	en	HumanObservation	Eleusine indica (L.) Gaertn.	Eleusine indica (L.) Gaertn.	Plantae	Equisetopsida	Poales	Poaceae	Eleusine	indica			species	(Linnaeus) Gaertner	accepted	S. Kurata | N. Ishikawa | D. T. Vasques	Japan	Tokyo	Meguro-ku	The University of Tokyo Campus, Komaba I	31	39	35.66	139.685	S. Kurata | N. Ishikawa | D. T. Vasques	KOMABA50	https://creativecommons.org/licenses/by/4.0/legalcode	2017/8/18	100
Eragrostis Wolf	58	2021/8/18	en	HumanObservation	Eragrostis ferruginea (Thunb.) P.Beauv.	Eragrostis ferruginea (Thunb.) P.Beauv.	Plantae	Equisetopsida	Poales	Poaceae	Eragrostis	ferruginea			species	(Thunberg) P. Beauvois	accepted	S. Kurata | N. Ishikawa | D. T. Vasques	Japan	Tokyo	Meguro-ku	The University of Tokyo Campus, Komaba I	31	39	35.66	139.685	S. Kurata | N. Ishikawa | D. T. Vasques	KOMABA58	https://creativecommons.org/licenses/by/4.0/legalcode	2017/8/18	100
Dactylis L.	62	2021/8/18	en	HumanObservation	Dactylis glomerata L.	Dactylis glomerata L.	Plantae	Equisetopsida	Poales	Poaceae	Dactylis	glomerata			species	Linnaeus	accepted	S. Kurata | N. Ishikawa | D. T. Vasques	Japan	Tokyo	Meguro-ku	The University of Tokyo Campus, Komaba I	31	39	35.66	139.685	S. Kurata | N. Ishikawa | D. T. Vasques	KOMABA62	https://creativecommons.org/licenses/by/4.0/legalcode	2018/4/20	100
Elymus L.	63	2021/8/18	en	HumanObservation	Elymus tsukushiensis Honda var. transiens (Hack.) Osada	Elymus tsukushiensis Honda var. transiens (Hack.) Osada	Plantae	Equisetopsida	Poales	Poaceae	Elymus	tsukushiensis	transiens		varietas	(Hackel) Osada	accepted	S. Kurata | N. Ishikawa | D. T. Vasques	Japan	Tokyo	Meguro-ku	The University of Tokyo Campus, Komaba I	31	39	35.66	139.685	S. Kurata | N. Ishikawa | D. T. Vasques	KOMABA63	https://creativecommons.org/licenses/by/4.0/legalcode	2017/8/19	100
Avena L.	67	2021/8/18	en	HumanObservation	Avena fatua L.	Avena fatua L.	Plantae	Equisetopsida	Poales	Poaceae	Avena	fatua			species	Linnaeus	accepted	S. Kurata | N. Ishikawa | D. T. Vasques	Japan	Tokyo	Meguro-ku	The University of Tokyo Campus, Komaba I	31	39	35.66	139.685	S. Kurata | N. Ishikawa | D. T. Vasques	KOMABA67	https://creativecommons.org/licenses/by/4.0/legalcode	2018/5/18	100
Bromus L.	75	2021/8/18	en	HumanObservation	Bromus remotiflorus (Steud.) Ohwi	Bromus remotiflorus (Steud.) Ohwi	Plantae	Equisetopsida	Poales	Poaceae	Bromus	remotiflorus			species	(Steudel) Ohwi	accepted	S. Kurata | N. Ishikawa | D. T. Vasques	Japan	Tokyo	Meguro-ku	The University of Tokyo Campus, Komaba I	31	39	35.66	139.685	S. Kurata | N. Ishikawa | D. T. Vasques	KOMABA75	https://creativecommons.org/licenses/by/4.0/legalcode	2018/6/29	100
Cynodon Rich.	80	2021/8/18	en	HumanObservation	Cynodon dactylon (L.) Pers.	Cynodon dactylon (L.) Pers.	Plantae	Equisetopsida	Poales	Poaceae	Cynodon	dactylon			species	(Linnaeus) Persoon	accepted	S. Kurata | N. Ishikawa | D. T. Vasques	Japan	Tokyo	Meguro-ku	The University of Tokyo Campus, Komaba I	31	39	35.66	139.685	S. Kurata | N. Ishikawa | D. T. Vasques	KOMABA80	https://creativecommons.org/licenses/by/4.0/legalcode	2018/6/2	100
Setaria P.Beauv.	82	2021/8/18	en	HumanObservation	Setaria pumila (Poir.) Roem. et Schult.	Setaria pumila (Poir.) Roem. et Schult.	Plantae	Equisetopsida	Poales	Poaceae	Setaria	pumila			species	(Poiret) Roemer et Schultes	accepted	S. Kurata | N. Ishikawa | D. T. Vasques	Japan	Tokyo	Meguro-ku	The University of Tokyo Campus, Komaba I	31	39	35.66	139.685	S. Kurata | N. Ishikawa | D. T. Vasques	KOMABA82	https://creativecommons.org/licenses/by/4.0/legalcode	2017/10/9	100
Briza L.	99	2021/8/18	en	HumanObservation	Briza maxima L.	Briza maxima L.	Plantae	Equisetopsida	Poales	Poaceae	Briza	maxima			species	Linnaeus	accepted	S. Kurata | N. Ishikawa | D. T. Vasques	Japan	Tokyo	Meguro-ku	The University of Tokyo Campus, Komaba I	31	39	35.66	139.685	S. Kurata | N. Ishikawa | D. T. Vasques	KOMABA99	https://creativecommons.org/licenses/by/4.0/legalcode	2018/5/2	100
Arthraxon P.Beauv.	100	2021/8/18	en	HumanObservation	Arthraxon hispidus (Thunb.) Makino	Arthraxon hispidus (Thunb.) Makino	Plantae	Equisetopsida	Poales	Poaceae	Arthraxon	hispidus			species	(Thunberg) Makino	accepted	S. Kurata | N. Ishikawa | D. T. Vasques	Japan	Tokyo	Meguro-ku	The University of Tokyo Campus, Komaba I	31	39	35.66	139.685	S. Kurata | N. Ishikawa | D. T. Vasques	KOMABA100	https://creativecommons.org/licenses/by/4.0/legalcode	2017/10/9	100
Leptatherum Nees	104	2021/8/18	en	HumanObservation	Leptatherum japonicum Franch. et Sav. var. japonicum	Leptatherum japonicum Franch. et Sav. var. japonicum	Plantae	Equisetopsida	Poales	Poaceae	Leptatherum	japonicum	japonicum		varietas	Franchet et Savatier	accepted	S. Kurata | N. Ishikawa | D. T. Vasques	Japan	Tokyo	Meguro-ku	The University of Tokyo Campus, Komaba I	31	39	35.66	139.685	S. Kurata | N. Ishikawa | D. T. Vasques	KOMABA104	https://creativecommons.org/licenses/by/4.0/legalcode	2018/9/15	100
Paspalum L.	111	2021/8/18	en	HumanObservation	Paspalum dilatatum Poir.	Paspalum dilatatum Poir.	Plantae	Equisetopsida	Poales	Poaceae	Paspalum	dilatatum			species	Poiret	accepted	S. Kurata | N. Ishikawa | D. T. Vasques	Japan	Tokyo	Meguro-ku	The University of Tokyo Campus, Komaba I	31	39	35.66	139.685	S. Kurata | N. Ishikawa | D. T. Vasques	KOMABA111	https://creativecommons.org/licenses/by/4.0/legalcode	2017/8/18	100
Miscanthus	121	2021/8/18	en	HumanObservation	Miscanthus sinensis Andersson	Miscanthus sinensis Andersson	Plantae	Equisetopsida	Poales	Poaceae	Miscanthus	sinensis			species	Andersson	accepted	S. Kurata | N. Ishikawa | D. T. Vasques	Japan	Tokyo	Meguro-ku	The University of Tokyo Campus, Komaba I	31	39	35.66	139.685	S. Kurata | N. Ishikawa | D. T. Vasques	KOMABA121	https://creativecommons.org/licenses/by/4.0/legalcode	2017/10/9	100
Poa L.	123	2021/8/18	en	HumanObservation	Poa annua L.	Poa annua L.	Plantae	Equisetopsida	Poales	Poaceae	Poa	annua			species	Linnaeus	accepted	S. Kurata | N. Ishikawa | D. T. Vasques	Japan	Tokyo	Meguro-ku	The University of Tokyo Campus, Komaba I	31	39	35.66	139.685	S. Kurata | N. Ishikawa | D. T. Vasques	KOMABA123	https://creativecommons.org/licenses/by/4.0/legalcode	2018/5/6	100
Sorghum Moench	125	2021/8/18	en	HumanObservation	Sorghum propinquum (Kunth) Hitchc.	Sorghum propinquum (Kunth) Hitchc.	Plantae	Equisetopsida	Poales	Poaceae	Sorghum	propinquum			species	(Kunth) Hitchcock	accepted	S. Kurata | N. Ishikawa | D. T. Vasques	Japan	Tokyo	Meguro-ku	The University of Tokyo Campus, Komaba I	31	39	35.66	139.685	S. Kurata | N. Ishikawa | D. T. Vasques	KOMABA125	https://creativecommons.org/licenses/by/4.0/legalcode	2018/6/11	100
Imperata Cirillo	132	2021/8/18	en	HumanObservation	Imperata cylindrica (L.) Raeusch. var. koenigii (Retz.) Pilg.	Imperata cylindrica (L.) Raeusch. var. koenigii (Retz.) Pilg.	Plantae	Equisetopsida	Poales	Poaceae	Imperata	cylindrica	koenigii		varietas	(Retzius) Pilger	accepted	S. Kurata | N. Ishikawa | D. T. Vasques	Japan	Tokyo	Meguro-ku	The University of Tokyo Campus, Komaba I	31	39	35.66	139.685	S. Kurata | N. Ishikawa | D. T. Vasques	KOMABA132	https://creativecommons.org/licenses/by/4.0/legalcode	2018/5/2	100
Pennisetum Rich.	133	2021/8/18	en	HumanObservation	Pennisetum alopecuroides (L.) Spreng.	Pennisetum alopecuroides (L.) Spreng.	Plantae	Equisetopsida	Poales	Poaceae	Pennisetum	alopecuroides			species	(Linnaeus) Sprengel	accepted	S. Kurata | N. Ishikawa | D. T. Vasques	Japan	Tokyo	Meguro-ku	The University of Tokyo Campus, Komaba I	31	39	35.66	139.685	S. Kurata | N. Ishikawa | D. T. Vasques	KOMABA133	https://creativecommons.org/licenses/by/4.0/legalcode	2017/10/9	100
Oplismenus P.Beauv.	135	2021/8/18	en	HumanObservation	Oplismenus undulatifolius (Ard.) Roem. et Schult.	Oplismenus undulatifolius (Ard.) Roem. et Schult.	Plantae	Equisetopsida	Poales	Poaceae	Oplismenus	undulatifolius			species	(Arduino) Roemer et Schultes	accepted	S. Kurata | N. Ishikawa | D. T. Vasques	Japan	Tokyo	Meguro-ku	The University of Tokyo Campus, Komaba I	31	39	35.66	139.685	S. Kurata | N. Ishikawa | D. T. Vasques	KOMABA135	https://creativecommons.org/licenses/by/4.0/legalcode	2017/10/9	100
Festuca L.	147	2021/8/18	en	HumanObservation	Festuca parvigluma Steud.	Festuca parvigluma Steud.	Plantae	Equisetopsida	Poales	Poaceae	Festuca	parvigluma			species	Steudel	accepted	S. Kurata | N. Ishikawa | D. T. Vasques	Japan	Tokyo	Meguro-ku	The University of Tokyo Campus, Komaba I	31	39	35.66	139.685	S. Kurata | N. Ishikawa | D. T. Vasques	KOMABA147	https://creativecommons.org/licenses/by/4.0/legalcode	2018/5/2	100
Panicum L.	155	2021/8/18	en	HumanObservation	Panicum bisulcatum Thunb.	Panicum bisulcatum Thunb.	Plantae	Equisetopsida	Poales	Poaceae	Panicum	bisulcatum			species	Thunberg	accepted	S. Kurata | N. Ishikawa | D. T. Vasques	Japan	Tokyo	Meguro-ku	The University of Tokyo Campus, Komaba I	31	39	35.66	139.685	S. Kurata | N. Ishikawa | D. T. Vasques	KOMABA155	https://creativecommons.org/licenses/by/4.0/legalcode	2018/10/2	100
Sporobolus R.Br.	156	2021/8/18	en	HumanObservation	Sporobolus fertilis (Steud.) Clayton	Sporobolus fertilis (Steud.) Clayton	Plantae	Equisetopsida	Poales	Poaceae	Sporobolus	fertilis			species	(Steudel) Clayton	accepted	S. Kurata | N. Ishikawa | D. T. Vasques	Japan	Tokyo	Meguro-ku	The University of Tokyo Campus, Komaba I	31	39	35.66	139.685	S. Kurata | N. Ishikawa | D. T. Vasques	KOMABA156	https://creativecommons.org/licenses/by/4.0/legalcode	2018/8/20	100
Lolium L.	157	2021/8/18	en	HumanObservation	Lolium multiflorum Lam.	Lolium multiflorum Lam.	Plantae	Equisetopsida	Poales	Poaceae	Lolium	multiflorum			species	Lamarck	accepted	S. Kurata | N. Ishikawa | D. T. Vasques	Japan	Tokyo	Meguro-ku	The University of Tokyo Campus, Komaba I	31	39	35.66	139.685	S. Kurata | N. Ishikawa | D. T. Vasques	KOMABA157	https://creativecommons.org/licenses/by/4.0/legalcode	2018/5/10	100
Anthoxanthum L.	175	2021/8/18	en	HumanObservation	Anthoxanthum odoratum L. subsp. odoratum	Anthoxanthum odoratum L. subsp. odoratum	Plantae	Equisetopsida	Poales	Poaceae	Anthoxanthum	odoratum	odoratum		subspecies	Linnaeus	accepted	S. Kurata | N. Ishikawa | D. T. Vasques	Japan	Tokyo	Meguro-ku	The University of Tokyo Campus, Komaba I	31	39	35.66	139.685	S. Kurata | N. Ishikawa | D. T. Vasques	KOMABA175	https://creativecommons.org/licenses/by/4.0/legalcode	2018/5/2	100
Lolium L.	195	2021/8/18	en	HumanObservation	Lolium perenne L.	Lolium perenne L.	Plantae	Equisetopsida	Poales	Poaceae	Lolium	perenne			species	Linnaeus	accepted	S. Kurata | N. Ishikawa | D. T. Vasques	Japan	Tokyo	Meguro-ku	The University of Tokyo Campus, Komaba I	31	39	35.66	139.685	S. Kurata | N. Ishikawa | D. T. Vasques	KOMABA195	https://creativecommons.org/licenses/by/4.0/legalcode	2018/5/10	100
Digitaria Haller	215	2021/8/18	en	HumanObservation	Digitaria ciliaris (Retz.) Koeler	Digitaria ciliaris (Retz.) Koeler	Plantae	Equisetopsida	Poales	Poaceae	Digitaria	ciliaris			species	(Retzius) Koeler	accepted	S. Kurata | N. Ishikawa | D. T. Vasques	Japan	Tokyo	Meguro-ku	The University of Tokyo Campus, Komaba I	31	39	35.66	139.685	S. Kurata | N. Ishikawa | D. T. Vasques	KOMABA215	https://creativecommons.org/licenses/by/4.0/legalcode	2017/8/18	100
Andropogon L.	216	2021/8/18	en	HumanObservation	Andropogon virginicus L.	Andropogon virginicus L.	Plantae	Equisetopsida	Poales	Poaceae	Andropogon	virginicus			species	Linnaeus	accepted	S. Kurata | N. Ishikawa | D. T. Vasques	Japan	Tokyo	Meguro-ku	The University of Tokyo Campus, Komaba I	31	39	35.66	139.685	S. Kurata | N. Ishikawa | D. T. Vasques	KOMABA216	https://creativecommons.org/licenses/by/4.0/legalcode	2018/9/23	100
Poa L.	243	2021/8/18	en	HumanObservation	Poa nipponica Koidz.	Poa nipponica Koidz.	Plantae	Equisetopsida	Poales	Poaceae	Poa	nipponica			species	Koidzumi	accepted	S. Kurata | N. Ishikawa | D. T. Vasques	Japan	Tokyo	Meguro-ku	The University of Tokyo Campus, Komaba I	31	39	35.66	139.685	S. Kurata | N. Ishikawa | D. T. Vasques	KOMABA243	https://creativecommons.org/licenses/by/4.0/legalcode	2018/5/18	100
Shibataea Makino ex Nakai	248	2021/8/18	en	HumanObservation	Shibataea kumasaca (Zoll. ex Steud.) Nakai	Shibataea kumasaca (Zoll. ex Steud.) Nakai	Plantae	Equisetopsida	Poales	Poaceae	Shibataea	kumasaca			species	(ZolLinnaeus ex Steudel) Nakai	accepted	S. Kurata | N. Ishikawa | D. T. Vasques	Japan	Tokyo	Meguro-ku	The University of Tokyo Campus, Komaba I	31	39	35.66	139.685	S. Kurata | N. Ishikawa | D. T. Vasques	KOMABA248	https://creativecommons.org/licenses/by/4.0/legalcode	2018/7/21	100
Echinochloa P.Beauv.	285	2021/8/18	en	HumanObservation	Echinochloa crus-galli (L.) P.Beauv. var. praticola Ohwi	Echinochloa crus-galli (L.) P.Beauv. var. praticola Ohwi	Plantae	Equisetopsida	Poales	Poaceae	Echinochloa	crus-galli	praticola		varietas	Ohwi	accepted	S. Kurata | N. Ishikawa | D. T. Vasques	Japan	Tokyo	Meguro-ku	The University of Tokyo Campus, Komaba I	31	39	35.66	139.685	S. Kurata | N. Ishikawa | D. T. Vasques	KOMABA285	https://creativecommons.org/licenses/by/4.0/legalcode	2018/6/29	100
Setaria P.Beauv.	295	2021/8/18	en	HumanObservation	Setaria viridis (L.) P.Beauv. f. misera Honda	Setaria viridis (L.) P.Beauv. f. misera Honda	Plantae	Equisetopsida	Poales	Poaceae	Setaria	viridis	misera		forma	Honda	accepted	S. Kurata | N. Ishikawa | D. T. Vasques	Japan	Tokyo	Meguro-ku	The University of Tokyo Campus, Komaba I	31	39	35.66	139.685	S. Kurata | N. Ishikawa | D. T. Vasques	KOMABA295	https://creativecommons.org/licenses/by/4.0/legalcode	2017/10/9	100
Rumex L.	17	2021/8/18	en	HumanObservation	Rumex conglomeratus Murray	Rumex conglomeratus Murray	Plantae	Equisetopsida	Caryophyllales	Polygonaceae	Rumex	conglomeratus			species	Murray	accepted	S. Kurata | N. Ishikawa | D. T. Vasques	Japan	Tokyo	Meguro-ku	The University of Tokyo Campus, Komaba I	31	39	35.66	139.685	S. Kurata | N. Ishikawa | D. T. Vasques	KOMABA17	https://creativecommons.org/licenses/by/4.0/legalcode	2018/5/5	100
Fallopia Adans.	20	2021/8/18	en	HumanObservation	Fallopia japonica (Houtt.) Ronse Decr. var. japonica	Fallopia japonica (Houtt.) Ronse Decr. var. japonica	Plantae	Equisetopsida	Caryophyllales	Polygonaceae	Fallopia	japonica	japonica		varietas	(Houttuyn) Ronse Decraene	accepted	S. Kurata | N. Ishikawa | D. T. Vasques	Japan	Tokyo	Meguro-ku	The University of Tokyo Campus, Komaba I	31	39	35.66	139.685	S. Kurata | N. Ishikawa | D. T. Vasques	KOMABA20	https://creativecommons.org/licenses/by/4.0/legalcode	2018/9/15	100
Persicaria Mill.	25	2021/8/18	en	HumanObservation	Persicaria longiseta (Bruijn) Kitag.	Persicaria longiseta (Bruijn) Kitag.	Plantae	Equisetopsida	Caryophyllales	Polygonaceae	Persicaria	longiseta			species	(Bruijn) Kitagawa	accepted	S. Kurata | N. Ishikawa | D. T. Vasques	Japan	Tokyo	Meguro-ku	The University of Tokyo Campus, Komaba I	31	39	35.66	139.685	S. Kurata | N. Ishikawa | D. T. Vasques	KOMABA25	https://creativecommons.org/licenses/by/4.0/legalcode	2017/8/19	100
Rumex L.	74	2021/8/18	en	HumanObservation	Rumex japonicus Houtt.	Rumex japonicus Houtt.	Plantae	Equisetopsida	Caryophyllales	Polygonaceae	Rumex	japonicus			species	Houttuyn	accepted	S. Kurata | N. Ishikawa | D. T. Vasques	Japan	Tokyo	Meguro-ku	The University of Tokyo Campus, Komaba I	31	39	35.66	139.685	S. Kurata | N. Ishikawa | D. T. Vasques	KOMABA74	https://creativecommons.org/licenses/by/4.0/legalcode	2018/5/2	100
Rumex L.	119	2021/8/18	en	HumanObservation	Rumex acetosa L.	Rumex acetosa L.	Plantae	Equisetopsida	Caryophyllales	Polygonaceae	Rumex	acetosa			species	Linnaeus	accepted	S. Kurata | N. Ishikawa | D. T. Vasques	Japan	Tokyo	Meguro-ku	The University of Tokyo Campus, Komaba I	31	39	35.66	139.685	S. Kurata | N. Ishikawa | D. T. Vasques	KOMABA119	https://creativecommons.org/licenses/by/4.0/legalcode	2018/4/20	100
Persicaria Mill.	169	2021/8/18	en	HumanObservation	Persicaria posumbu (Buch.-Ham. ex D.Don) H.Gross	Persicaria posumbu (Buch.-Ham. ex D.Don) H.Gross	Plantae	Equisetopsida	Caryophyllales	Polygonaceae	Persicaria	posumbu			species	(Buchanan-Hamilton ex D. Don) H. Gross	accepted	S. Kurata | N. Ishikawa | D. T. Vasques	Japan	Tokyo	Meguro-ku	The University of Tokyo Campus, Komaba I	31	39	35.66	139.685	S. Kurata | N. Ishikawa | D. T. Vasques	KOMABA169	https://creativecommons.org/licenses/by/4.0/legalcode	2018/10/2	100
Persicaria Mill.	185	2021/8/18	en	HumanObservation	Persicaria capitata (Buch.-Ham. ex D.Don) H.Gross	Persicaria capitata (Buch.-Ham. ex D.Don) H.Gross	Plantae	Equisetopsida	Caryophyllales	Polygonaceae	Persicaria	capitata			species	(Buchanan-Hamilton ex D. Don) H. Gross	accepted	S. Kurata | N. Ishikawa | D. T. Vasques	Japan	Tokyo	Meguro-ku	The University of Tokyo Campus, Komaba I	31	39	35.66	139.685	S. Kurata | N. Ishikawa | D. T. Vasques	KOMABA185	https://creativecommons.org/licenses/by/4.0/legalcode	2018/6/19	100
Persicaria Mill.	197	2021/8/18	en	HumanObservation	Persicaria pubescens (Blume) H.Hara	Persicaria pubescens (Blume) H.Hara	Plantae	Equisetopsida	Caryophyllales	Polygonaceae	Persicaria	pubescens			species	(Blume) H. Hara	accepted	S. Kurata | N. Ishikawa | D. T. Vasques	Japan	Tokyo	Meguro-ku	The University of Tokyo Campus, Komaba I	31	39	35.66	139.685	S. Kurata | N. Ishikawa | D. T. Vasques	KOMABA197	https://creativecommons.org/licenses/by/4.0/legalcode	2017/10/9	100
Polygonum L.	200	2021/8/18	en	HumanObservation	Polygonum senticosum (Meisn.) Franch. et Sav.	Polygonum senticosum (Meisn.) Franch. et Sav.	Plantae	Equisetopsida	Caryophyllales	Polygonaceae	Polygonum	senticosum			species	(Meisner) Franchet et Savatier	accepted	S. Kurata | N. Ishikawa | D. T. Vasques	Japan	Tokyo	Meguro-ku	The University of Tokyo Campus, Komaba I	31	39	35.66	139.685	S. Kurata | N. Ishikawa | D. T. Vasques	KOMABA200	https://creativecommons.org/licenses/by/4.0/legalcode	2017/8/19	100
Persicaria Mill.	206	2021/8/18	en	HumanObservation	Persicaria filiformis (Thunb.) Nakai ex W.T.Lee	Persicaria filiformis (Thunb.) Nakai ex W.T.Lee	Plantae	Equisetopsida	Caryophyllales	Polygonaceae	Persicaria	filiformis			species	(Thunberg) Nakai ex W.T. Lee	accepted	S. Kurata | N. Ishikawa | D. T. Vasques	Japan	Tokyo	Meguro-ku	The University of Tokyo Campus, Komaba I	31	39	35.66	139.685	S. Kurata | N. Ishikawa | D. T. Vasques	KOMABA206	https://creativecommons.org/licenses/by/4.0/legalcode	2017/8/18	100
Rumex L.	242	2021/8/18	en	HumanObservation	Rumex obtusifolius L.	Rumex obtusifolius L.	Plantae	Equisetopsida	Caryophyllales	Polygonaceae	Rumex	obtusifolius			species	Linnaeus	accepted	S. Kurata | N. Ishikawa | D. T. Vasques	Japan	Tokyo	Meguro-ku	The University of Tokyo Campus, Komaba I	31	39	35.66	139.685	S. Kurata | N. Ishikawa | D. T. Vasques	KOMABA242	https://creativecommons.org/licenses/by/4.0/legalcode	2018/6/2	100
Persicaria Mill.	294	2021/8/18	en	HumanObservation	Persicaria thunbergii (Siebold et Zucc.) H.Gross	Persicaria thunbergii (Siebold et Zucc.) H.Gross	Plantae	Equisetopsida	Caryophyllales	Polygonaceae	Persicaria	thunbergii			species	(Siebold et Zuccarini) H. Gross	accepted	S. Kurata | N. Ishikawa | D. T. Vasques	Japan	Tokyo	Meguro-ku	The University of Tokyo Campus, Komaba I	31	39	35.66	139.685	S. Kurata | N. Ishikawa | D. T. Vasques	KOMABA294	https://creativecommons.org/licenses/by/4.0/legalcode	2017/10/9	100
Lepisorus (Sm.) Ching	270	2021/8/18	en	HumanObservation	Lepisorus thunbergianus (Kaulf.) Ching	Lepisorus thunbergianus (Kaulf.) Ching	Plantae	Equisetopsida	Caryophyllales	Polypodiaceae	Lepisorus	thunbergianus			species	(Kaulfuss) Ching	accepted	S. Kurata | N. Ishikawa | D. T. Vasques	Japan	Tokyo	Meguro-ku	The University of Tokyo Campus, Komaba I	31	39	35.66	139.685	S. Kurata | N. Ishikawa | D. T. Vasques	KOMABA270	https://creativecommons.org/licenses/by/4.0/legalcode	2018/8/15	100
Lysimachia L.	96	2021/8/18	en	HumanObservation	Lysimachia japonica Thunb.	Lysimachia japonica Thunb.	Plantae	Equisetopsida	Ericales	Primulaceae	Lysimachia	japonica			species	Thunberg	accepted	S. Kurata | N. Ishikawa | D. T. Vasques	Japan	Tokyo	Meguro-ku	The University of Tokyo Campus, Komaba I	31	39	35.66	139.685	S. Kurata | N. Ishikawa | D. T. Vasques	KOMABA96	https://creativecommons.org/licenses/by/4.0/legalcode	2018/5/18	100
Ardisia Sw.	276	2021/8/18	en	HumanObservation	Ardisia crenata Sims	Ardisia crenata Sims	Plantae	Equisetopsida	Ericales	Primulaceae	Ardisia	crenata			species	Sims	accepted	S. Kurata | N. Ishikawa | D. T. Vasques	Japan	Tokyo	Meguro-ku	The University of Tokyo Campus, Komaba I	31	39	35.66	139.685	S. Kurata | N. Ishikawa | D. T. Vasques	KOMABA276	https://creativecommons.org/licenses/by/4.0/legalcode	2018/7/21	100
Pteris L.	31	2021/8/18	en	HumanObservation	Pteris multifida Poir.	Pteris multifida Poir.	Plantae	Equisetopsida	Polypodiales	Pteridaceae	Pteris	multifida			species	Poiret	accepted	S. Kurata | N. Ishikawa | D. T. Vasques	Japan	Tokyo	Meguro-ku	The University of Tokyo Campus, Komaba I	31	39	35.66	139.685	S. Kurata | N. Ishikawa | D. T. Vasques	KOMABA31	https://creativecommons.org/licenses/by/4.0/legalcode	2018/6/2	100
Ranunculus L.	76	2021/8/18	en	HumanObservation	Ranunculus silerifolius H.Lév. var. glaber (H.Boissieu) Tamura	Ranunculus silerifolius H.Lév. var. glaber (H.Boissieu) Tamura	Plantae	Equisetopsida	Ranunculales	Ranunculaceae	Ranunculus	silerifolius	glaber		varietas	(H. Boissieu) Tamura	accepted	S. Kurata | N. Ishikawa | D. T. Vasques	Japan	Tokyo	Meguro-ku	The University of Tokyo Campus, Komaba I	31	39	35.66	139.685	S. Kurata | N. Ishikawa | D. T. Vasques	KOMABA76	https://creativecommons.org/licenses/by/4.0/legalcode	2018/6/29	100
Ranunculus L.	92	2021/8/18	en	HumanObservation	Ranunculus cantoniensis DC.	Ranunculus cantoniensis DC.	Plantae	Equisetopsida	Ranunculales	Ranunculaceae	Ranunculus	cantoniensis			species	Candolle	accepted	S. Kurata | N. Ishikawa | D. T. Vasques	Japan	Tokyo	Meguro-ku	The University of Tokyo Campus, Komaba I	31	39	35.66	139.685	S. Kurata | N. Ishikawa | D. T. Vasques	KOMABA92	https://creativecommons.org/licenses/by/4.0/legalcode	2018/6/2	100
Delphinium L.	127	2021/8/18	en	HumanObservation	Delphinium anthriscifolium Hance	Delphinium anthriscifolium Hance	Plantae	Equisetopsida	Ranunculales	Ranunculaceae	Delphinium	anthriscifolium			species	Hance	accepted	S. Kurata | N. Ishikawa | D. T. Vasques	Japan	Tokyo	Meguro-ku	The University of Tokyo Campus, Komaba I	31	39	35.66	139.685	S. Kurata | N. Ishikawa | D. T. Vasques	KOMABA127	https://creativecommons.org/licenses/by/4.0/legalcode	2017/4/14	100
Semiaquilegia Makino	181	2021/8/18	en	HumanObservation	Semiaquilegia adoxoides (DC.) Makino	Semiaquilegia adoxoides (DC.) Makino	Plantae	Equisetopsida	Ranunculales	Ranunculaceae	Semiaquilegia	adoxoides			species	(Candolle) Makino	accepted	S. Kurata | N. Ishikawa | D. T. Vasques	Japan	Tokyo	Meguro-ku	The University of Tokyo Campus, Komaba I	31	39	35.66	139.685	S. Kurata | N. Ishikawa | D. T. Vasques	KOMABA181	https://creativecommons.org/licenses/by/4.0/legalcode	2017/4/13	100
Agrimonia L.	83	2021/8/18	en	HumanObservation	Agrimonia pilosa Ledeb. var. japonica (Miq.) Nakai	Agrimonia pilosa Ledeb. var. japonica (Miq.) Nakai	Plantae	Equisetopsida	Rosales	Rosaceae	Agrimonia	pilosa	japonica		varietas	(Miquel) Nakai	accepted	S. Kurata | N. Ishikawa | D. T. Vasques	Japan	Tokyo	Meguro-ku	The University of Tokyo Campus, Komaba I	31	39	35.66	139.685	S. Kurata | N. Ishikawa | D. T. Vasques	KOMABA83	https://creativecommons.org/licenses/by/4.0/legalcode	2018/8/20	100
Rubus L.	86	2021/8/18	en	HumanObservation	Rubus hirsutus Thunb.	Rubus hirsutus Thunb.	Plantae	Equisetopsida	Rosales	Rosaceae	Rubus	hirsutus			species	Thunberg	accepted	S. Kurata | N. Ishikawa | D. T. Vasques	Japan	Tokyo	Meguro-ku	The University of Tokyo Campus, Komaba I	31	39	35.66	139.685	S. Kurata | N. Ishikawa | D. T. Vasques	KOMABA86	https://creativecommons.org/licenses/by/4.0/legalcode	2017/4/14	100
Rhaphiolepis Lindl.	112	2021/8/18	en	HumanObservation	Rhaphiolepis indica (L.) Lindl. var. umbellata (Thunb.) H.Ohashi	Rhaphiolepis indica (L.) Lindl. var. umbellata (Thunb.) H.Ohashi	Plantae	Equisetopsida	Rosales	Rosaceae	Rhaphiolepis	indica	umbellata		varietas	(Thunberg) H. Ohashi	accepted	S. Kurata | N. Ishikawa | D. T. Vasques	Japan	Tokyo	Meguro-ku	The University of Tokyo Campus, Komaba I	31	39	35.66	139.685	S. Kurata | N. Ishikawa | D. T. Vasques	KOMABA112	https://creativecommons.org/licenses/by/4.0/legalcode	2018/10/11	100
Pyracantha M.Roem.	131	2021/8/18	en	HumanObservation	Pyracantha angustifolia (Franch.) C.K.Schneid.	Pyracantha angustifolia (Franch.) C.K.Schneid.	Plantae	Equisetopsida	Rosales	Rosaceae	Pyracantha	angustifolia			species	(Franchet) C.K. Schneider	accepted	S. Kurata | N. Ishikawa | D. T. Vasques	Japan	Tokyo	Meguro-ku	The University of Tokyo Campus, Komaba I	31	39	35.66	139.685	S. Kurata | N. Ishikawa | D. T. Vasques	KOMABA131	https://creativecommons.org/licenses/by/4.0/legalcode	2018/6/2	100
Potentilla L.	193	2021/8/18	en	HumanObservation	Potentilla hebiichigo Yonek. et H.Ohashi	Potentilla hebiichigo Yonek. et H.Ohashi	Plantae	Equisetopsida	Rosales	Rosaceae	Potentilla	hebiichigo			species	Yonekura et H. Ohashi	accepted	S. Kurata | N. Ishikawa | D. T. Vasques	Japan	Tokyo	Meguro-ku	The University of Tokyo Campus, Komaba I	31	39	35.66	139.685	S. Kurata | N. Ishikawa | D. T. Vasques	KOMABA193	https://creativecommons.org/licenses/by/4.0/legalcode	2017/4/21	100
Potentilla L.	224	2021/8/18	en	HumanObservation	Potentilla indica (Andrews) Th.Wolf	Potentilla indica (Andrews) Th.Wolf	Plantae	Equisetopsida	Rosales	Rosaceae	Potentilla	indica			species	(Andrews) Th. Wolf	accepted	S. Kurata | N. Ishikawa | D. T. Vasques	Japan	Tokyo	Meguro-ku	The University of Tokyo Campus, Komaba I	31	39	35.66	139.685	S. Kurata | N. Ishikawa | D. T. Vasques	KOMABA224	https://creativecommons.org/licenses/by/4.0/legalcode	2018/3/29	100
Kerria DC.	230	2021/8/18	en	HumanObservation	Kerria japonica (L.) DC.	Kerria japonica (L.) DC.	Plantae	Equisetopsida	Rosales	Rosaceae	Kerria	japonica			species	(Linnaeus) Candolle	accepted	S. Kurata | N. Ishikawa | D. T. Vasques	Japan	Tokyo	Meguro-ku	The University of Tokyo Campus, Komaba I	31	39	35.66	139.685	S. Kurata | N. Ishikawa | D. T. Vasques	KOMABA230	https://creativecommons.org/licenses/by/4.0/legalcode	2018/3/29	100
Photinia Lindl.	236	2021/8/18	en	HumanObservation	Photinia x fraseri W.J.Dress 'Red Robin'	Photinia x fraseri W.J.Dress 'Red Robin'	Plantae	Equisetopsida	Rosales	Rosaceae	Photinia	x fraseri			species	W.J. Dress	accepted	S. Kurata | N. Ishikawa | D. T. Vasques	Japan	Tokyo	Meguro-ku	The University of Tokyo Campus, Komaba I	31	39	35.66	139.685	S. Kurata | N. Ishikawa | D. T. Vasques	KOMABA236	https://creativecommons.org/licenses/by/4.0/legalcode	2018/3/29	100
Eriobotrya Lindl.	289	2021/8/18	en	HumanObservation	Eriobotrya japonica (Thunb.) Lindl.	Eriobotrya japonica (Thunb.) Lindl.	Plantae	Equisetopsida	Rosales	Rosaceae	Eriobotrya	japonica			species	(Thunberg) Lindley	accepted	S. Kurata | N. Ishikawa | D. T. Vasques	Japan	Tokyo	Meguro-ku	The University of Tokyo Campus, Komaba I	31	39	35.66	139.685	S. Kurata | N. Ishikawa | D. T. Vasques	KOMABA289	https://creativecommons.org/licenses/by/4.0/legalcode	2018/6/2	100
Galium L.	186	2021/8/18	en	HumanObservation	Galium gracilens (A.Gray) Makino	Galium gracilens (A.Gray) Makino	Plantae	Equisetopsida	Gentianales	Rubiaceae	Galium	gracilens			species	(Asa Gray) Makino	accepted	S. Kurata | N. Ishikawa | D. T. Vasques	Japan	Tokyo	Meguro-ku	The University of Tokyo Campus, Komaba I	31	39	35.66	139.685	S. Kurata | N. Ishikawa | D. T. Vasques	KOMABA186	https://creativecommons.org/licenses/by/4.0/legalcode	2018/6/5	100
Paederia L.	191	2021/8/18	en	HumanObservation	Paederia foetida L.	Paederia foetida L.	Plantae	Equisetopsida	Gentianales	Rubiaceae	Paederia	foetida			species	Linnaeus	accepted	S. Kurata | N. Ishikawa | D. T. Vasques	Japan	Tokyo	Meguro-ku	The University of Tokyo Campus, Komaba I	31	39	35.66	139.685	S. Kurata | N. Ishikawa | D. T. Vasques	KOMABA191	https://creativecommons.org/licenses/by/4.0/legalcode	2017/8/18	100
Galium L.	218	2021/8/18	en	HumanObservation	Galium spurium L. var. echinospermon (Wallr.) Desp.	Galium spurium L. var. echinospermon (Wallr.) Desp.	Plantae	Equisetopsida	Gentianales	Rubiaceae	Galium	spurium	echinospermon		varietas	(Wallroth) Desportes	accepted	S. Kurata | N. Ishikawa | D. T. Vasques	Japan	Tokyo	Meguro-ku	The University of Tokyo Campus, Komaba I	31	39	35.66	139.685	S. Kurata | N. Ishikawa | D. T. Vasques	KOMABA218	https://creativecommons.org/licenses/by/4.0/legalcode	2018/3/29	100
Zanthoxylum L.	109	2021/8/18	en	HumanObservation	Zanthoxylum piperitum (L.) DC.	Zanthoxylum piperitum (L.) DC.	Plantae	Equisetopsida	Sapindales	Rutaceae	Zanthoxylum	piperitum			species	(Linnaeus) Candolle	accepted	S. Kurata | N. Ishikawa | D. T. Vasques	Japan	Tokyo	Meguro-ku	The University of Tokyo Campus, Komaba I	31	39	35.66	139.685	S. Kurata | N. Ishikawa | D. T. Vasques	KOMABA109	https://creativecommons.org/licenses/by/4.0/legalcode	2018/6/2	100
Idesia Maxim.	19	2021/8/18	en	HumanObservation	Idesia polycarpa Maxim.	Idesia polycarpa Maxim.	Plantae	Equisetopsida	Mapighiales	Salicaceae	Idesia	polycarpa			species	Maximowicz	accepted	S. Kurata | N. Ishikawa | D. T. Vasques	Japan	Tokyo	Meguro-ku	The University of Tokyo Campus, Komaba I	31	39	35.66	139.685	S. Kurata | N. Ishikawa | D. T. Vasques	KOMABA19	https://creativecommons.org/licenses/by/4.0/legalcode	2018/5/18	100
Houttuynia Thunb.	146	2021/8/18	en	HumanObservation	Houttuynia cordata Thunb.	Houttuynia cordata Thunb.	Plantae	Equisetopsida	Piperales	Saururaceae	Houttuynia	cordata			species	Thunberg	accepted	S. Kurata | N. Ishikawa | D. T. Vasques	Japan	Tokyo	Meguro-ku	The University of Tokyo Campus, Komaba I	31	39	35.66	139.685	S. Kurata | N. Ishikawa | D. T. Vasques	KOMABA146	https://creativecommons.org/licenses/by/4.0/legalcode	2017/5/16	100
Illicium L.	257	2021/8/18	en	HumanObservation	Illicium anisatum L.	Illicium anisatum L.	Plantae	Equisetopsida	Austrobaileyales	Schisandraceae	Illicium	anisatum			species	Linnaeus	accepted	S. Kurata | N. Ishikawa | D. T. Vasques	Japan	Tokyo	Meguro-ku	The University of Tokyo Campus, Komaba I	31	39	35.66	139.685	S. Kurata | N. Ishikawa | D. T. Vasques	KOMABA257	https://creativecommons.org/licenses/by/4.0/legalcode	2018/6/29	100
Picrasma Blume	152	2021/8/18	en	HumanObservation	Picrasma quassioides (D.Don) Benn.	Picrasma quassioides (D.Don) Benn.	Plantae	Equisetopsida	Sapindales	Simaroubaceae	Picrasma	quassioides			species	(D. Don) Bennett	accepted	S. Kurata | N. Ishikawa | D. T. Vasques	Japan	Tokyo	Meguro-ku	The University of Tokyo Campus, Komaba I	31	39	35.66	139.685	S. Kurata | N. Ishikawa | D. T. Vasques	KOMABA152	https://creativecommons.org/licenses/by/4.0/legalcode	2018/11/12	100
Ailanthus Desf.	154	2021/8/18	en	HumanObservation	Ailanthus altissima (Mill.) Swingle	Ailanthus altissima (Mill.) Swingle	Plantae	Equisetopsida	Sapindales	Simaroubaceae	Ailanthus	altissima			species	(Miller) Swingle	accepted	S. Kurata | N. Ishikawa | D. T. Vasques	Japan	Tokyo	Meguro-ku	The University of Tokyo Campus, Komaba I	31	39	35.66	139.685	S. Kurata | N. Ishikawa | D. T. Vasques	KOMABA154	https://creativecommons.org/licenses/by/4.0/legalcode	2018/5/17	100
Salpichroa Miers	166	2021/8/18	en	HumanObservation	Salpichroa origanifolia (Lam.) Baill.	Salpichroa origanifolia (Lam.) Baill.	Plantae	Equisetopsida	Solanales	Solanaceae	Salpichroa	origanifolia			species	(Lamarck) Thellung	accepted	S. Kurata | N. Ishikawa | D. T. Vasques	Japan	Tokyo	Meguro-ku	The University of Tokyo Campus, Komaba I	31	39	35.66	139.685	S. Kurata | N. Ishikawa | D. T. Vasques	KOMABA166	https://creativecommons.org/licenses/by/4.0/legalcode	2018/3/29	100
Solanum L.	187	2021/8/18	en	HumanObservation	Solanum lyratum Thunb.	Solanum lyratum Thunb.	Plantae	Equisetopsida	Solanales	Solanaceae	Solanum	lyratum			species	Thunberg	accepted	S. Kurata | N. Ishikawa | D. T. Vasques	Japan	Tokyo	Meguro-ku	The University of Tokyo Campus, Komaba I	31	39	35.66	139.685	S. Kurata | N. Ishikawa | D. T. Vasques	KOMABA187	https://creativecommons.org/licenses/by/4.0/legalcode	2017/8/18	100
Solanum L.	237	2021/8/18	en	HumanObservation	Solanum carolinense L.	Solanum carolinense L.	Plantae	Equisetopsida	Solanales	Solanaceae	Solanum	carolinense			species	Linnaeus	accepted	S. Kurata | N. Ishikawa | D. T. Vasques	Japan	Tokyo	Meguro-ku	The University of Tokyo Campus, Komaba I	31	39	35.66	139.685	S. Kurata | N. Ishikawa | D. T. Vasques	KOMABA237	https://creativecommons.org/licenses/by/4.0/legalcode	2017/7/1	100
Styrax L.	34	2021/8/18	en	HumanObservation	Styrax japonicus Siebold et Zucc.	Styrax japonicus Siebold et Zucc.	Plantae	Equisetopsida	Ericales	Styracaceae	Styrax	japonicus			species	Siebold et Zuccarini	accepted	S. Kurata | N. Ishikawa | D. T. Vasques	Japan	Tokyo	Meguro-ku	The University of Tokyo Campus, Komaba I	31	39	35.66	139.685	S. Kurata | N. Ishikawa | D. T. Vasques	KOMABA34	https://creativecommons.org/licenses/by/4.0/legalcode	2018/5/18	100
Styrax L.	165	2021/8/18	en	HumanObservation	Styrax obassia Siebold et Zucc.	Styrax obassia Siebold et Zucc.	Plantae	Equisetopsida	Ericales	Styracaceae	Styrax	obassia			species	Siebold et Zuccarini	accepted	S. Kurata | N. Ishikawa | D. T. Vasques	Japan	Tokyo	Meguro-ku	The University of Tokyo Campus, Komaba I	31	39	35.66	139.685	S. Kurata | N. Ishikawa | D. T. Vasques	KOMABA165	https://creativecommons.org/licenses/by/4.0/legalcode	2018/6/2	100
Talinum Adans.	167	2021/8/18	en	HumanObservation	Talinum paniculatum (Jacq.) Gaertn.	Talinum paniculatum (Jacq.) Gaertn.	Plantae	Equisetopsida	Caryophyllales	Talinaceae	Talinum	paniculatum			species	(Jacquin) Gaertner	accepted	S. Kurata | N. Ishikawa | D. T. Vasques	Japan	Tokyo	Meguro-ku	The University of Tokyo Campus, Komaba I	31	39	35.66	139.685	S. Kurata | N. Ishikawa | D. T. Vasques	KOMABA167	https://creativecommons.org/licenses/by/4.0/legalcode	2017/6/16	100
Taxus L.	21	2021/8/18	en	HumanObservation	Taxus cuspidata Siebold et Zucc.	Taxus cuspidata Siebold et Zucc.	Plantae	Equisetopsida	Pinales	Taxaceae	Taxus	cuspidata			species	Siebold et Zuccarini	accepted	S. Kurata | N. Ishikawa | D. T. Vasques	Japan	Tokyo	Meguro-ku	The University of Tokyo Campus, Komaba I	31	39	35.66	139.685	S. Kurata | N. Ishikawa | D. T. Vasques	KOMABA21	https://creativecommons.org/licenses/by/4.0/legalcode	2018/8/15	100
Ternstroemia Mutis ex L.f.	217	2021/8/18	en	HumanObservation	Ternstroemia gymnanthera (Wight et Arn.) Bedd.	Ternstroemia gymnanthera (Wight et Arn.) Bedd.	Plantae	Equisetopsida	Ericales	Ternstroemiaceae	Ternstroemia	gymnanthera			species	(Wight et Arnott) Beddome	accepted	S. Kurata | N. Ishikawa | D. T. Vasques	Japan	Tokyo	Meguro-ku	The University of Tokyo Campus, Komaba I	31	39	35.66	139.685	S. Kurata | N. Ishikawa | D. T. Vasques	KOMABA217	https://creativecommons.org/licenses/by/4.0/legalcode	2018/6/2	100
Camellia L.	105	2021/8/18	en	HumanObservation	Camellia sasanqua Thunb.	Camellia sasanqua Thunb.	Plantae	Equisetopsida	Ericales	Theaceae	Camellia	sasanqua			species	Thunberg	accepted	S. Kurata | N. Ishikawa | D. T. Vasques	Japan	Tokyo	Meguro-ku	The University of Tokyo Campus, Komaba I	31	39	35.66	139.685	S. Kurata | N. Ishikawa | D. T. Vasques	KOMABA105	https://creativecommons.org/licenses/by/4.0/legalcode	2018/10/11	100
Stewartia L.	183	2021/8/18	en	HumanObservation	Stewartia monadelpha Siebold et Zucc.	Stewartia monadelpha Siebold et Zucc.	Plantae	Equisetopsida	Ericales	Theaceae	Stewartia	monadelpha			species	Siebold et Zuccarini	accepted	S. Kurata | N. Ishikawa | D. T. Vasques	Japan	Tokyo	Meguro-ku	The University of Tokyo Campus, Komaba I	31	39	35.66	139.685	S. Kurata | N. Ishikawa | D. T. Vasques	KOMABA183	https://creativecommons.org/licenses/by/4.0/legalcode	2018/8/15	100
Thelypteris Schmidel	174	2021/8/18	en	HumanObservation	Thelypteris japonica (Baker) Ching	Thelypteris japonica (Baker) Ching	Plantae	Equisetopsida	Polypodiales	Thelypteridaceae	Thelypteris	japonica			species	(Baker) Ching	accepted	S. Kurata | N. Ishikawa | D. T. Vasques	Japan	Tokyo	Meguro-ku	The University of Tokyo Campus, Komaba I	31	39	35.66	139.685	S. Kurata | N. Ishikawa | D. T. Vasques	KOMABA174	https://creativecommons.org/licenses/by/4.0/legalcode	2018/7/21	100
Thelypteris Schmidel	194	2021/8/18	en	HumanObservation	Thelypteris acuminata (Houtt.) C.V.Morton	Thelypteris acuminata (Houtt.) C.V.Morton	Plantae	Equisetopsida	Polypodiales	Thelypteridaceae	Thelypteris	acuminata			species	(Houttuyn) C.V. Morton	accepted	S. Kurata | N. Ishikawa | D. T. Vasques	Japan	Tokyo	Meguro-ku	The University of Tokyo Campus, Komaba I	31	39	35.66	139.685	S. Kurata | N. Ishikawa | D. T. Vasques	KOMABA194	https://creativecommons.org/licenses/by/4.0/legalcode	2018/7/12	100
Thelypteris Schmidel	209	2021/8/18	en	HumanObservation	Thelypteris viridifrons Tagawa	Thelypteris viridifrons Tagawa	Plantae	Equisetopsida	Polypodiales	Thelypteridaceae	Thelypteris	viridifrons			species	Tagawa	accepted	S. Kurata | N. Ishikawa | D. T. Vasques	Japan	Tokyo	Meguro-ku	The University of Tokyo Campus, Komaba I	31	39	35.66	139.685	S. Kurata | N. Ishikawa | D. T. Vasques	KOMABA209	https://creativecommons.org/licenses/by/4.0/legalcode	2018/7/12	100
Ulmus L.	7	2021/8/18	en	HumanObservation	Ulmus parvifolia Jacq.	Ulmus parvifolia Jacq.	Plantae	Equisetopsida	Rosales	Ulmaceae	Ulmus	parvifolia			species	Jacquin	accepted	S. Kurata | N. Ishikawa | D. T. Vasques	Japan	Tokyo	Meguro-ku	The University of Tokyo Campus, Komaba I	31	39	35.66	139.685	S. Kurata | N. Ishikawa | D. T. Vasques	KOMABA7	https://creativecommons.org/licenses/by/4.0/legalcode	2018/10/11	100
Zelkova Spach	93	2021/8/18	en	HumanObservation	Zelkova serrata (Thunb.) Makino	Zelkova serrata (Thunb.) Makino	Plantae	Equisetopsida	Rosales	Ulmaceae	Zelkova	serrata			species	(Thunberg) Makino	accepted	S. Kurata | N. Ishikawa | D. T. Vasques	Japan	Tokyo	Meguro-ku	The University of Tokyo Campus, Komaba I	31	39	35.66	139.685	S. Kurata | N. Ishikawa | D. T. Vasques	KOMABA93	https://creativecommons.org/licenses/by/4.0/legalcode	2018/4/20	100
Pilea Lindl.	5	2021/8/18	en	HumanObservation	Pilea pumila (L.) A.Gray	Pilea pumila (L.) A.Gray	Plantae	Equisetopsida	Rosales	Urticaceae	Pilea	pumila			species	(Linnaeus) A. Gray	accepted	S. Kurata | N. Ishikawa | D. T. Vasques	Japan	Tokyo	Meguro-ku	The University of Tokyo Campus, Komaba I	31	39	35.66	139.685	S. Kurata | N. Ishikawa | D. T. Vasques	KOMABA5	https://creativecommons.org/licenses/by/4.0/legalcode	2017/10/9	100
Boehmeria Jacq.	68	2021/8/18	en	HumanObservation	Boehmeria nivea (L.) Gaudich. var. concolor Makino f. nipononivea (Koidz.) Kitam. ex H.Ohba	Boehmeria nivea (L.) Gaudich. var. concolor Makino f. nipononivea (Koidz.) Kitam. ex H.Ohba	Plantae	Equisetopsida	Rosales	Urticaceae	Boehmeria	nivea	nipononivea		forma	(Koidzumi) Kitamura ex Ohba	accepted	S. Kurata | N. Ishikawa | D. T. Vasques	Japan	Tokyo	Meguro-ku	The University of Tokyo Campus, Komaba I	31	39	35.66	139.685	S. Kurata | N. Ishikawa | D. T. Vasques	KOMABA68	https://creativecommons.org/licenses/by/4.0/legalcode	2018/9/15	100
Boehmeria Jacq.	225	2021/8/18	en	HumanObservation	Boehmeria japonica (L.f.) Miq. var. longispica (Steud.) Yahara	Boehmeria japonica (L.f.) Miq. var. longispica (Steud.) Yahara	Plantae	Equisetopsida	Rosales	Urticaceae	Boehmeria	japonica	longispica		varietas	(Steudel) Yahara	accepted	S. Kurata | N. Ishikawa | D. T. Vasques	Japan	Tokyo	Meguro-ku	The University of Tokyo Campus, Komaba I	31	39	35.66	139.685	S. Kurata | N. Ishikawa | D. T. Vasques	KOMABA225	https://creativecommons.org/licenses/by/4.0/legalcode	2017/8/18	100
Lantana L.	110	2021/8/18	en	HumanObservation	Lantana camara L. subsp. aculeata (L.) R.W.Sanders	Lantana camara L. subsp. aculeata (L.) R.W.Sanders	Plantae	Equisetopsida	Lamiales	Verbenaceae	Lantana	camara	aculeata		subspecies	(Linnaeus) Sanders	accepted	S. Kurata | N. Ishikawa | D. T. Vasques	Japan	Tokyo	Meguro-ku	The University of Tokyo Campus, Komaba I	31	39	35.66	139.685	S. Kurata | N. Ishikawa | D. T. Vasques	KOMABA110	https://creativecommons.org/licenses/by/4.0/legalcode	2017/8/18	100
Phyla Lour.	180	2021/8/18	en	HumanObservation	Phyla nodiflora (L.) Greene var. minor (Gillies et Hook.) N.O'Leary et Mulgura	Phyla nodiflora (L.) Greene var. minor (Gillies et Hook.) N.O'Leary et Mulgura	Plantae	Equisetopsida	Lamiales	Verbenaceae	Phyla	nodiflora	minor		varietas	(Gillies et Hooker) N.O'Leary et Mulgura	accepted	S. Kurata | N. Ishikawa | D. T. Vasques	Japan	Tokyo	Meguro-ku	The University of Tokyo Campus, Komaba I	31	39	35.66	139.685	S. Kurata | N. Ishikawa | D. T. Vasques	KOMABA180	https://creativecommons.org/licenses/by/4.0/legalcode	2017/8/18	100
Duranta L.	264	2021/8/18	en	HumanObservation	Duranta erecta L.	Duranta erecta L.	Plantae	Equisetopsida	Lamiales	Verbenaceae	Duranta	erecta			species	Linnaeus	accepted	S. Kurata | N. Ishikawa | D. T. Vasques	Japan	Tokyo	Meguro-ku	The University of Tokyo Campus, Komaba I	31	39	35.66	139.685	S. Kurata | N. Ishikawa | D. T. Vasques	KOMABA264	https://creativecommons.org/licenses/by/4.0/legalcode	2017/8/18	100
Viola L.	15	2021/8/18	en	HumanObservation	Viola sororia Willd.	Viola sororia Willd.	Plantae	Equisetopsida	Malpighiales	Violaceae	Viola	sororia			species	Willdenow	accepted	S. Kurata | N. Ishikawa | D. T. Vasques	Japan	Tokyo	Meguro-ku	The University of Tokyo Campus, Komaba I	31	39	35.66	139.685	S. Kurata | N. Ishikawa | D. T. Vasques	KOMABA15	https://creativecommons.org/licenses/by/4.0/legalcode	2018/3/29	100
Viola L.	130	2021/8/18	en	HumanObservation	Viola grypoceras A.Gray var. grypoceras	Viola grypoceras A.Gray var. grypoceras	Plantae	Equisetopsida	Malpighiales	Violaceae	Viola	grypoceras	grypoceras		varietas	A. Gray	accepted	S. Kurata | N. Ishikawa | D. T. Vasques	Japan	Tokyo	Meguro-ku	The University of Tokyo Campus, Komaba I	31	39	35.66	139.685	S. Kurata | N. Ishikawa | D. T. Vasques	KOMABA130	https://creativecommons.org/licenses/by/4.0/legalcode	2017/4/12	100
Viola L.	204	2021/8/18	en	HumanObservation	Viola keiskei Miq.	Viola keiskei Miq.	Plantae	Equisetopsida	Malpighiales	Violaceae	Viola	keiskei			species	Miquel	accepted	S. Kurata | N. Ishikawa | D. T. Vasques	Japan	Tokyo	Meguro-ku	The University of Tokyo Campus, Komaba I	31	39	35.66	139.685	S. Kurata | N. Ishikawa | D. T. Vasques	KOMABA204	https://creativecommons.org/licenses/by/4.0/legalcode	2017/4/21	100
Viola L.	302	2021/8/18	en	HumanObservation	Viola yedoensis Makino	Viola yedoensis Makino	Plantae	Equisetopsida	Malpighiales	Violaceae	Viola	yedoensis			species	Makino	accepted	S. Kurata | N. Ishikawa | D. T. Vasques	Japan	Tokyo	Meguro-ku	The University of Tokyo Campus, Komaba I	31	39	35.66	139.685	S. Kurata | N. Ishikawa | D. T. Vasques	KOMABA302	https://creativecommons.org/licenses/by/4.0/legalcode	2019/4/13	100
Ampelopsis Michx.	163	2021/8/18	en	HumanObservation	Ampelopsis glandulosa (Wall.) Momiy. var. heterophylla (Thunb.) Momiy.	Ampelopsis glandulosa (Wall.) Momiy. var. heterophylla (Thunb.) Momiy.	Plantae	Equisetopsida	Vitales	Vitaceae	Ampelopsis	glandulosa	heterophylla		varietas	(Thunberg) Momiyama	accepted	S. Kurata | N. Ishikawa | D. T. Vasques	Japan	Tokyo	Meguro-ku	The University of Tokyo Campus, Komaba I	31	39	35.66	139.685	S. Kurata | N. Ishikawa | D. T. Vasques	KOMABA163	https://creativecommons.org/licenses/by/4.0/legalcode	2018/7/21	100
Causonis Raf.	299	2021/8/18	en	HumanObservation	Causonis japonica (Thunb.) Raf.	Causonis japonica (Thunb.) Raf.	Plantae	Equisetopsida	Vitales	Vitaceae	Causonis	japonica			species	(Thunberg) Rafinesque	accepted	S. Kurata | N. Ishikawa | D. T. Vasques	Japan	Tokyo	Meguro-ku	The University of Tokyo Campus, Komaba I	31	39	35.66	139.685	S. Kurata | N. Ishikawa | D. T. Vasques	KOMABA299	https://creativecommons.org/licenses/by/4.0/legalcode	2017/5/16	100
Hemerocallis L.	300	2021/8/18	en	HumanObservation	Hemerocallis fulva L. var. kwanso Regel	Hemerocallis fulva L. var. kwanso Regel	Plantae	Equisetopsida	Asparagales	Xanthorrhoeaceae	Hemerocallis	fulva	kwanso		varietas	Regel	accepted	S. Kurata | N. Ishikawa | D. T. Vasques	Japan	Tokyo	Meguro-ku	The University of Tokyo Campus, Komaba I	31	39	35.66	139.685	S. Kurata | N. Ishikawa | D. T. Vasques	KOMABA300	https://creativecommons.org/licenses/by/4.0/legalcode	2018/6/19	100
Carex L.	305	2021/8/18	en	HumanObservation	Carex parciflora Boott var. macroglossa (Franch. et Sav.) Ohwi	Carex parciflora Boott var. macroglossa (Franch. et Sav.) Ohwi	Plantae	Equisetopsida	Poales	Cyperaceae	Carex	parciflora	macroglossa		varietas	(Franchet et Savatier) Ohwi	accepted	S. Kurata | N. Ishikawa | D. T. Vasques	Japan	Tokyo	Meguro-ku	The University of Tokyo Campus, Komaba I	31	39	35.66	139.685	S. Kurata | N. Ishikawa | D. T. Vasques	KOMABA305	https://creativecommons.org/licenses/by/4.0/legalcode	2019	100
Osmunda L.	306	2021/8/18	en	HumanObservation	Osmunda japonica Thunb.	Osmunda japonica Thunb.	Plantae	Equisetopsida	Osmundales	Osmundaceae	Osmunda	japonica			species	Thunberg	accepted	S. Kurata | N. Ishikawa | D. T. Vasques	Japan	Tokyo	Meguro-ku	The University of Tokyo Campus, Komaba I	31	39	35.66	139.685	S. Kurata | N. Ishikawa | D. T. Vasques	KOMABA306	https://creativecommons.org/licenses/by/4.0/legalcode	2018/8/15	100
Cerasus Mill.	307	2021/8/18	en	HumanObservation	Cerasus x yedoensis (Matsum.) Masam. et S.Suzuki 'Somei-yoshino'	Cerasus x yedoensis (Matsum.) Masam. et S.Suzuki 'Somei-yoshino'	Plantae	Equisetopsida	Rosales	Rosaceae	Cerasus	x yedoensis			species	(Matsumura) Masamume et S. Suzuki	accepted	S. Kurata | N. Ishikawa | D. T. Vasques	Japan	Tokyo	Meguro-ku	The University of Tokyo Campus, Komaba I	31	39	35.66	139.685	S. Kurata | N. Ishikawa | D. T. Vasques	KOMABA307	https://creativecommons.org/licenses/by/4.0/legalcode	2019	100
Citrus L.	308	2021/8/18	en	HumanObservation	Citrus trifoliata L.	Citrus trifoliata L.	Plantae	Equisetopsida	Sapindales	Rutaceae	Citrus	trifoliata			species	Linnaeus	accepted	S. Kurata | N. Ishikawa | D. T. Vasques	Japan	Tokyo	Meguro-ku	The University of Tokyo Campus, Komaba I	31	39	35.66	139.685	S. Kurata | N. Ishikawa | D. T. Vasques	KOMABA308	https://creativecommons.org/licenses/by/4.0/legalcode	2019	100
Cerasus Mill.	309	2021/8/18	en	HumanObservation	Cerasus Mill.	Cerasus Mill.	Plantae	Equisetopsida	Rosales	Rosaceae	Cerasus			Sato-zakura Group	genus	Mill.	accepted	S. Kurata | N. Ishikawa | D. T. Vasques	Japan	Tokyo	Meguro-ku	The University of Tokyo Campus, Komaba I	31	39	35.66	139.685	S. Kurata | N. Ishikawa | D. T. Vasques	KOMABA309	https://creativecommons.org/licenses/by/4.0/legalcode	2019	100
Cerasus Mill.	310	2021/8/18	en	HumanObservation	Cerasus itosakura (Siebold) Masam. et S.Suzuki 'Pendula'	Cerasus itosakura (Siebold) Masam. et S.Suzuki 'Pendula'	Plantae	Equisetopsida	Rosales	Rosaceae	Cerasus	itosakura			species	(Siebold) Masamune. et S. Suzuki 'Pendula'	accepted	S. Kurata | N. Ishikawa | D. T. Vasques	Japan	Tokyo	Meguro-ku	The University of Tokyo Campus, Komaba I	31	39	35.66	139.685	S. Kurata | N. Ishikawa | D. T. Vasques	KOMABA310	https://creativecommons.org/licenses/by/4.0/legalcode	2019	100
Veronica L.	311	2021/8/18	en	HumanObservation	Veronica persica Poir.	Veronica persica Poir.	Plantae	Equisetopsida	Lamiales	Plantaginaceae	Veronica	persica			species	Poiret	accepted	S. Kurata | N. Ishikawa | D. T. Vasques	Japan	Tokyo	Meguro-ku	The University of Tokyo Campus, Komaba I	31	39	35.66	139.685	S. Kurata | N. Ishikawa | D. T. Vasques	KOMABA311	https://creativecommons.org/licenses/by/4.0/legalcode	2019/3/21	100
Akebia Decne.	312	2021/8/18	en	HumanObservation	Akebia quinata (Houtt.) Decne.	Akebia quinata (Houtt.) Decne.	Plantae	Equisetopsida	Ranunculales	Lardizabalaceae	Akebia	quinata			species	(Houttuyn) Decaisne	accepted	S. Kurata | N. Ishikawa | D. T. Vasques	Japan	Tokyo	Meguro-ku	The University of Tokyo Campus, Komaba I	31	39	35.66	139.685	S. Kurata | N. Ishikawa | D. T. Vasques	KOMABA312	https://creativecommons.org/licenses/by/4.0/legalcode	2019/3/21	100
Cinnamomum Schaeff.	314	2021/8/18	en	HumanObservation	Cinnamomum yabunikkei H.Ohba	Cinnamomum yabunikkei H.Ohba	Plantae	Equisetopsida	Laurales	Lauraceae	Cinnamomum	yabunikkei			species	H. Ohba	accepted	S. Kurata | N. Ishikawa | D. T. Vasques	Japan	Tokyo	Meguro-ku	The University of Tokyo Campus, Komaba I	31	39	35.66	139.685	S. Kurata | N. Ishikawa | D. T. Vasques	KOMABA314	https://creativecommons.org/licenses/by/4.0/legalcode	2019/3/21	100
Cardamine L.	316	2021/8/18	en	HumanObservation	Cardamine occulta Hornem.	Cardamine occulta Hornem.	Plantae	Equisetopsida	Brassicales	Brassicaceae	Cardamine	occulta			species	Hornemann	accepted	S. Kurata | N. Ishikawa | D. T. Vasques	Japan	Tokyo	Meguro-ku	The University of Tokyo Campus, Komaba I	31	39	35.66	139.685	S. Kurata | N. Ishikawa | D. T. Vasques	KOMABA316	https://creativecommons.org/licenses/by/4.0/legalcode	2019/3/21	100
Olea L.	317	2021/8/18	en	HumanObservation	Olea europaea L.	Olea europaea L.	Plantae	Equisetopsida	Lamiales	Oleaceae	Olea	europaea			species	Linnaeus	accepted	S. Kurata | N. Ishikawa | D. T. Vasques	Japan	Tokyo	Meguro-ku	The University of Tokyo Campus, Komaba I	31	39	35.66	139.685	S. Kurata | N. Ishikawa | D. T. Vasques	KOMABA317	https://creativecommons.org/licenses/by/4.0/legalcode	2019/3/21	100
Veronica L.	318	2021/8/18	en	HumanObservation	Veronica hederifolia L.	Veronica hederifolia L.	Plantae	Equisetopsida	Lamiales	Plantaginaceae	Veronica	hederifolia			species	Linnaeus	accepted	S. Kurata | N. Ishikawa | D. T. Vasques	Japan	Tokyo	Meguro-ku	The University of Tokyo Campus, Komaba I	31	39	35.66	139.685	S. Kurata | N. Ishikawa | D. T. Vasques	KOMABA318	https://creativecommons.org/licenses/by/4.0/legalcode	2019/3/21	100
Spiraea L.	319	2021/8/18	en	HumanObservation	Spiraea thunbergii Siebold ex Blume	Spiraea thunbergii Siebold ex Blume	Plantae	Equisetopsida	Rosales	Rosaceae	Spiraea	thunbergii			species	Siebold ex Blume	accepted	S. Kurata | N. Ishikawa | D. T. Vasques	Japan	Tokyo	Meguro-ku	The University of Tokyo Campus, Komaba I	31	39	35.66	139.685	S. Kurata | N. Ishikawa | D. T. Vasques	KOMABA319	https://creativecommons.org/licenses/by/4.0/legalcode	2019/3/21	100
Acer L.	320	2021/8/18	en	HumanObservation	Acer palmatum Thunb.	Acer palmatum Thunb.	Plantae	Equisetopsida	Sapindales	Sapindaceae	Acer	palmatum			species	Thunberg	accepted	S. Kurata | N. Ishikawa | D. T. Vasques	Japan	Tokyo	Meguro-ku	The University of Tokyo Campus, Komaba I	31	39	35.66	139.685	S. Kurata | N. Ishikawa | D. T. Vasques	KOMABA320	https://creativecommons.org/licenses/by/4.0/legalcode	2019/3/21	100
Camellia L.	321	2021/8/18	en	HumanObservation	Camellia japonica L.	Camellia japonica L.	Plantae	Equisetopsida	Ericales	Theaceae	Camellia	japonica			species	Linnaeus	accepted	S. Kurata | N. Ishikawa | D. T. Vasques	Japan	Tokyo	Meguro-ku	The University of Tokyo Campus, Komaba I	31	39	35.66	139.685	S. Kurata | N. Ishikawa | D. T. Vasques	KOMABA321	https://creativecommons.org/licenses/by/4.0/legalcode	2019/3/21	100
Petasites Mill.	322	2021/8/18	en	HumanObservation	Petasites japonicus (Siebold et Zucc.) Maxim.	Petasites japonicus (Siebold et Zucc.) Maxim.	Plantae	Equisetopsida	Asterales	Asteraceae	Petasites	japonicus			species	(Siebold et Zuccarini) Maximowicz	accepted	S. Kurata | N. Ishikawa | D. T. Vasques	Japan	Tokyo	Meguro-ku	The University of Tokyo Campus, Komaba I	31	39	35.66	139.685	S. Kurata | N. Ishikawa | D. T. Vasques	KOMABA322	https://creativecommons.org/licenses/by/4.0/legalcode	2019/3/21	100
Lamium	323	2021/8/18	en	HumanObservation	Lamium amplexicaule L.	Lamium amplexicaule L.	Plantae	Equisetopsida	Lamiales	Lamiaceae	Lamium	amplexicaule			species	Linnaeus	accepted	S. Kurata | N. Ishikawa | D. T. Vasques	Japan	Tokyo	Meguro-ku	The University of Tokyo Campus, Komaba I	31	39	35.66	139.685	S. Kurata | N. Ishikawa | D. T. Vasques	KOMABA323	https://creativecommons.org/licenses/by/4.0/legalcode	2019/3/21	100
Daphne L.	324	2021/8/18	en	HumanObservation	Daphne odora Thunb.	Daphne odora Thunb.	Plantae	Equisetopsida	Malvales	Thymelaeaceae	Daphne	odora			species	Thunberg	accepted	S. Kurata | N. Ishikawa | D. T. Vasques	Japan	Tokyo	Meguro-ku	The University of Tokyo Campus, Komaba I	31	39	35.66	139.685	S. Kurata | N. Ishikawa | D. T. Vasques	KOMABA324	https://creativecommons.org/licenses/by/4.0/legalcode	2019/3/21	100
Magnolia L.	325	2021/8/18	en	HumanObservation	Magnolia denudata Desr.	Magnolia denudata Desr.	Plantae	Equisetopsida	Magnoliales	Magnoliaceae	Magnolia	denudata			species	Desrousseaux	accepted	S. Kurata | N. Ishikawa | D. T. Vasques	Japan	Tokyo	Meguro-ku	The University of Tokyo Campus, Komaba I	31	39	35.66	139.685	S. Kurata | N. Ishikawa | D. T. Vasques	KOMABA325	https://creativecommons.org/licenses/by/4.0/legalcode	2019/3/21	100
Chaenomeles Lindl.	326	2021/8/18	en	HumanObservation	Chaenomeles speciosa (Sweet) Nakai	Chaenomeles speciosa (Sweet) Nakai	Plantae	Equisetopsida	Rosales	Rosaceae	Chaenomeles	speciosa			species	(Sweet) Nakai	accepted	S. Kurata | N. Ishikawa | D. T. Vasques	Japan	Tokyo	Meguro-ku	The University of Tokyo Campus, Komaba I	31	39	35.66	139.685	S. Kurata | N. Ishikawa | D. T. Vasques	KOMABA326	https://creativecommons.org/licenses/by/4.0/legalcode	2019/3/21	100
Abies Mill.	327	2021/8/18	en	HumanObservation	Abies firma Siebold et Zucc.	Abies firma Siebold et Zucc.	Plantae	Equisetopsida	Pinales	Pinaceae	Abies	firma			species	Siebold et Zuccarini	accepted	S. Kurata | N. Ishikawa | D. T. Vasques	Japan	Tokyo	Meguro-ku	The University of Tokyo Campus, Komaba I	31	39	35.66	139.685	S. Kurata | N. Ishikawa | D. T. Vasques	KOMABA327	https://creativecommons.org/licenses/by/4.0/legalcode	2019/3/21	100
Iris L.	328	2021/8/18	en	HumanObservation	Iris japonica Thunb.	Iris japonica Thunb.	Plantae	Equisetopsida	Asparagales	Iridaceae	Iris	japonica			species	Thunberg	accepted	S. Kurata | N. Ishikawa | D. T. Vasques	Japan	Tokyo	Meguro-ku	The University of Tokyo Campus, Komaba I	31	39	35.66	139.685	S. Kurata | N. Ishikawa | D. T. Vasques	KOMABA328	https://creativecommons.org/licenses/by/4.0/legalcode	2019/3/21	100
